# Supplementary material for: Monitoring aerosols over Europe: an assessment of the potential benefit of assimilating the VIS04 measurements from the future MTG/FCI geostationary imager
Source: Copernicus journal article supplement (doi:10.5194/amt-2018-215), 2018-08-06
Supplement: Supplementary file [file amt-2018-215-AC1-supplement.pdf]

Dear Editor, Dear reviewers,

We thank both reviewers for their positive and constructive comments on the first version of the manuscript. We have taken into account their suggestions as described below. These corrections have led to a new version of the manuscript, which we hope to be considered for final publication in *Atmospheric Measurement Techniques*.

In this letter, we provide response to all Reviewer Comments. For a clear and easy-to-follow sequence, every comment is copied in *Italic* and is followed by our answer, in which the changes that have been done in the new version of the manuscript are addressed. The page and line references can be found in the “track-change” file.

## **Response to Reviewer Comments 1**

### *Major comments*

- 1. The procedure to create the synthetic datasets is not clear. What is clear is that a lot of effort and time has gone into this part of the work, but then the procedure is introduced in what it looked to me a chaotic way. First you talk about the Monte Carlo approach to calculate the radiances, then you mention a global sensitivity analysis whose purpose is not clear, then you mention the use of the OPAC tables. I was not sure whether the AODs were retrieved from the simulated FCI radiances and how. I really got lost in this section. Please rewrite it all keeping in mind that most readers are not familiar with how to create a synthetic AOD dataset. Give enough details, but do not get carried away.*

This section has been completely re-written, aiming at clarifying the methodology and at pointing out the essential steps and results. As you may see in the new version of the manuscript (Section 3), the method consists in adding an error perturbation to the NR AOD, which variance is deduced from a sensitivity analysis taking into account the FCI characteristics. The sensitivity analysis is used to compute a look-up-table that provides the RMSE of AOD as a function of key parameters. This methodology has never been published and so we consider that it deserves to be presented and explained with enough details. But we acknowledge that some unnecessary details were misleading in the previous version of the manuscript. They have been removed (two tables and two figures) or summarized. Also, part of the method description, that is not essential to the understanding of the article, have been exported in an appendix.

- 2. At the end of section 3, you conclude that only a few profiles can be assimilated over the continent. This is an important result but at the same time undermines the concept of the paper which is to highlight the usefulness of the high temporal resolution data from the geostationary sensors. Besides, it is important to keep the study realistic, but with an OSSE you can go wild and seek to demonstrate the untapped potential of the instrument. For example, what would happen if you were able to use the full temporal resolution of the instrument and not only hourly data? Have you thought of these issues? What is completely unrealistic and what is pushing the limit of the technology? I do not feel you had the time to address these important questions. While this may be subject of future work, you need to comment on this and add your insight.*

Since we consider assimilation of FCI data for regional-scale pollution with a 0.2° model, the study does not fully exploit the temporal and horizontal high-resolution of FCI. Our objective is to assess how much the VIS04 channel is useful for air pollution in Europe with a 0.2° resolution model using hourly observations. We agree that our study does not fully exploit the potential of FCI, and that this question needs to be addressed. To clarify this question, the new version of the manuscript :

- In the introduction, it has been clarified that the study focuses on regional scale pollution (page 3, line 29),
- Includes a discussion (Section 6), in which a whole paragraph addresses the potential of the high-resolution of FCI,
- In the conclusion, a perspective has been added about the exploitation of FCI at high resolution (page 17, lines 26-29).

3. *You only selected one wavelength (444nm). I am sure this was due to the amount of work needed to generate the synthetic dataset but your choice needs to be better justified as it is rather limiting.*

In the introduction, the choice of this wavelength has been justified by the fact that it is new compared to SEVIRI and that it is the shortest one, theoretically favourable for the detecting fine particles. In the new manuscript, in order to clarify and expand the justification:

- because MOCAGE cannot assimilate AOD at several wavelengths simultaneously, only one wavelength was chosen. The introduction brings forward the argument (page 3, line 31) that the study focuses on the more relevant wavelength (the shortest) *a priori for fine aerosol detection*,
- In Section 2.3 (*Assimilation system PALM*), we provide more argument why MOCAGE cannot assimilate AOD from several wavelengths simultaneously; a sentence has also been added at the beginning of Section 3.

4. *In some parts the paper reads too academic. For example, the long list of verification metrics including the formulas is not needed. Please change that.*

The formulas and definition of verification metrics have been removed (page 7).

5. *For all figures, particularly the PM maps, the legends have to be bigger.*

The PM maps have been zoomed in and their legends have been improved, in a similar manner for the figures of the article and of the supplementary material document.

6. *Some of the tables can be eliminated. I found table 3 particularly cumbersome. Please consider presenting the information in a more concise way.*

Table 3 has been removed and reference to Ceamanos et al (2014), where the same information may be found, has been added (page 18, line 10). Some other figures and tables, mostly related to Section 3, could be removed from the manuscript without losing the essential information, so they have been removed.

*Other comments:*

*Page 2 Line 20: please use also this reference. Peuch, V. and Engelen, R.: Towards and operational GMES Atmosphere Monitoring Service, ECMWF Newsletter, 132, 20–25, 2012.*

Done (page 2, line 25)

*Page 3 Line 20: Please expand the overview of the OSSE approach and provide more references.*

The end of the introduction (page 4, lines 1-11) has been re-ordered to make a specific paragraph on the OSSE approach. This paragraph has been expanded with more references and now it points out the main potentialities and limitations of OSSEs

*Page 5 Line 10: are 6 bins used for all aerosols, including sulphates, nitrates etc?*

Done (page 5, line 20)

*Page 5 Line 23: “parameterized” instead of “made”*

Done (page 6, line 1)

*Page 6 Line 9: Please add Benedetti et al, 2009 (Benedetti, A., Morcrette, J.-J., Boucher, O., Dethof, A., Engelen, R., Fisher, M., Flentje, H., Huneeus, N., Jones, L., Kaiser, J., et al.: Aerosol analysis and forecast in the European centre for medium-range weather forecasts integrated forecast system: 2. Data assimilation, Journal of Geophysical Research: Atmospheres (1984–2012), 114, 2009) to the reference list for the AOD assimilation approach.*

Done (page 3 line 20, and page 6 line 17)

*Page 6 Line 18. Is the computation of the optical properties performed online or off-line and tabulated in a look-up table.*

It is done off-line ; we have completed the manuscript accordingly (page 7 lines 26-27)

*Page 7 Lines 10-30. Please rewrite in a less academic way. Maybe you do not need to put formulas for all of the metrics.*

Done

*Page 8. Line 7. This is not useful, please explain what 1-5 means.*

Done (page 7, lines 29-30)

*Page 8 Line 12: remove “a bit”. The underestimation of PM in global aerosol models is a general problem, due to unresolved emissions and coarse resolution. Even a resolution of 0.2 does not allow to resolve all the regional and urban pollution features.*

Done (page 8, line 1)

*Page 8 Line 30. It is unusual that AOD is overestimated. The explanation on page 9 line 10 is unlikely.*

At the global scale, Sic et al (2015) showed also that MOCAGE tends to overestimate AOD, despite PM at surface are underestimated. We acknowledge that other models tend also to underestimate AOD (Morcrette et al, 2009). The comparison of our NR with AERONET stations show that the bias is almost positive for all stations in Europe. This can be explained by assumptions in MOCAGE and in the AOD calculations : the vertical profiles of emission injections, the size distribution of aerosols and the hypotheses that underlie the computation of optical properties.

This part of the manuscript has been rephrased (page 8, lines 24-34).

*Page 9 Line 23: why was only one wavelength selected, and why the 444nm?*

*Referring to the general comments this section is not clear to me and would benefit from substantial rewriting.*

Done

*Page 13 Lines 24-32. You are effectively saying that your experimental set-up is not adequate to explore the potentiality of the instrument due to limited spatial resolution. This is actually not ideal for an OSSE. Would it be possible to run the model at higher resolution or downscale somehow the synthetic AOD? I am not suggesting this extension for this study, but perhaps for a follow-on.*

A discussion (Section 6) has been added, that addresses this question.

*Page 14 Line 5. Please explain how convergence is connected to thinning. Usually thinning is applied to avoid using correlated observations in the assimilation, without accounting for the correlation errors (off-diagonal elements of the R matrix).*

Our argument that thinning is useful to speed up convergence is based on some experiments that we have done using these observations and MOCAGE-PALM. We have rephrased this sentence (page 12, lines 27-28).

*Page 14 Line 18. Use another adjective instead of "great".*

« great » has been removed (page 13, line 10).

*Page 14 Line 19. I missed the supplementary material. Was it accessible?*

Yes, it is on the same webpage as the article, besides the manuscript.

*Page 16 Line 8-9. Where does the improvement in the vertical profile come from? AOD does not contain information in the vertical distribution of the aerosols.*

We have added an argument there (page 15, lines 2-4), based on the published work of Sic et al (2016).

*Section 6. The conclusions are fine but this is where you should elaborate more what you would do to extend this study. For example you could comment on trying to increase the resolution of the model to produce synthetic measurements that are closer to the future capabilities of FCI (or something along these lines).*

This question is addressed in the discussion (Section 6). Besides, the conclusion has also been expanded following this line.

## **Response to Reviewer Comments 2**

*- To identify the value of the new instrument it should ideally be compared to the current situation. Currently most operational models assimilate surface observations of PM10 and PM2.5 and some also AOD observations from e.g. MODIS. It would be beneficial to show the added value of the FCI observations on top of these common observations. How beneficial are these observations from the geostationary instrument as compared to observations from an orbiting satellite with lower temporal resolution. Perhaps an experiment could be done with assimilation of only one observation per day, as compared to the hourly observations, do you see an added value? Can the satellite observations replace or add value to the surface observations (which are much cheaper). This is something is really miss in the discussion to support the value of this instrument for aerosol modelling.*

In the new discussion section, we have added a discussion on this issue. This discussion includes the results of a new simulation called AR3LEO, in which only pixels at 12UTC are assimilated every day.

*- I would suggest more room for discussion of the results. There is a large focus on the areas/cases where it goes well, but some discussion is required on the situations where it does not work so well. The assimilation distributes the increments based on the fractions, so it can not correct for errors in the size distributions. The same holds for the vertical distributions. The AOD does not provide any*

*vertical information, so what happens when the vertical profile is wrong, such as for example in figure 16 bottom right, you can see that the system does not work in these cases. So when the AOD is underestimated but the surface PM is overestimated (or the other way around), the AOD observations will increase the PM at all levels also at the surface, leading to worse results. This discussion on AOD-PM relationship and the importance of having correct vertical distributions or vertical information is missing and should be added. Especially since you are showing that your NR shows overestimation of AOD and underestimation of PM, when you would use that version of the model for assimilation I think you would get problems*

In section 6, some more discussion on how important the vertical distribution of aerosols is and about the relationship between AOD bias and PM bias has been added. This discussion follows the presentation of the results in Section 5 about the vertical distribution of PM of CR3 and CR4 and the biases at surface of AR4.

*- The model runs are performed at a resolution of approximately 20km which is soon not really representative anymore for regional air quality forecasts/analysis. Many models already run at a 0.1 deg resolution. Especially since the observations are available at a 2km resolution I wonder why it is not chosen to run at a higher resolution. Somewhere it is mentioned that the goal of the study is to evaluate the impact for continental modelling, Please elaborate a bit more on this choice and for the discussion part I would add the potential to look at the impact at urban scales, maybe in a follow-up study.*

Discussion has been added on this issue (Section 6).

*- For the vertical distribution of the aerosol emissions, a fixed profile is used as I understand correctly, is this not depending on the source type of the emissions, e.g. car emissions at the surface and emissions from industry higher up*

Yes, a fixed profile is used for all source type. This is the usual MOCAGE setup.

*- The inclusion or exclusion of SOA is not clear throughout the paper. Somewhere it is mentioned that SOA is added to the NR and CR1 by using a percentage of the primary carbon species. But further along it looks as if the SOA is not included in the computation of AOD (p9, line 16-17), is that correct? Your nature run is the "real world" so then also the synthetic observations should include the SOA. What is the impact of excluding SOA in the AOD synthetic observations*

SOA are included in the NR (page 7, lines 19-20) and CR1 (page 10, line 22) and not in other CR (consistently with Table 4). SOA are included in the AOD synthetic observations (like all types of aerosols, as stated in Section 3).

*- Section 3 is very hard for me to follow, it is not within my field of expertise but I get the impression that the AOD is only computed from the model concentrations without taking into account any radiative transfer modelling? Is this a correct assumption from my side? because then the sensitivity of the instrument to different altitudes in the atmosphere is not taken into account which can lead to overoptimistic results. On the other hand the errors are computed in a very accurate way. A lot of attention goes to the simulation of these errors, which are very important for the realism of the OSSE. However I think the amount of figures/tables and text dedicated to this part of the study is out of proportion and needs condensation and rewriting.*

This section has been completely re-written, aiming at clarifying the methodology and at pointing out the essential steps and results. A radiative transfer model (LibRadTran, see the Appendix) is indeed taken into account for the computation of errors. The methodology to compute AOD errors has never been published and so we consider that it deserves to be presented and explained with

enough details. But some unnecessary details have been removed and some parts of section 3 have been moved to the appendix and also summarized.

- p 11, *Filtering: A lot of observations are removed due to filtering. This is an important comment. The added value of geostationary satellites lies in their temporal resolution. If you only retain 1 to 4 observations per day, is there still a large added value, is this representative of the future real situation? Please add some discussion*

The filtering (or thinning) procedure that is applied is a spatial filtering. We have found that such thinning procedure did change the assimilated fields slightly only but did save some computing time. A presentation on temporal and spatial representativeness is developed at the beginning of Section 5 and a discussion on its implication for future use of FCI data has been added in Section 6.

- *Location of observations, the observations seem to be concentrated over central Europe, how representative are the results at the AQeR for other regions? You can see that the plots for the entire domain provide different conclusions than the plots for the AQeR stations.*

The results on maps show improvement of scores at most places of the domain. This behaviour is thus consistent with the scores at AQeR stations.

- *Validity of CR-NR: The statistical metrics have been compared to metrics from literature. Two different papers have been used, but if I am correct both evaluating the ensemble of models which is always better than the individual models. Have you also compared to individual model results. The CR-NR seem to be smaller than the NR – real observations difference.*

By introducing differences between the key factors that affect PM forecasts (meteorological drivers, emissions, SOA) and by examining their impact on scores, we aim at evaluating and guaranteeing sufficient differences between NR and CR.

Besides, since the work of Marécal et al (2015), most of models (and particularly the ones of MACC and CAMS) have improved for PM forecasts and their scores are now in the range of values of the difference between the CR and NR of our study. So it is acceptable that the CR-NR differences are representative of real errors, particularly for CR3 and CR4.

- *Only one observation per hour is used because of the system. As is suggested in the conclusion I would make a super observation. It is mentioned that avoiding overoptimistic results is one of the reasons for this choice but I do not agree as this will probably be done once the observations become available in real life, so I do not see why this would lead to overoptimistic results*  
We agree. The comment on the over-optimistic results has been removed (page 12, line 25).

- *Spatially 3 out of 4 observations are removed through filtering for convergence of cost function, while already a lot of observations are removed due to clouds etc. Is a larger impact of the observations foreseen without this spatial filtering*

It has been verified on a short period that thinning does not change significantly the fields. A comment on this has been added (page 12, lines 30-31). The horizontal correlation length of the background error covariance matrix is set to  $0.4^\circ$  in order to propagate the increments horizontally.

- p1., line 17 Abstract, *change 4-months to 4-month*  
Done (page 1, line 17)

- p2. Line 6. *which lead → which leads*  
Done (page 2, line 9)

- p2, line 13, *Only the WHO limit values are mentioned, but it would also be good to include the official EU limit values.*

Done (page 2, lines 18-19)

- p2, line 20, there are more appropriate references for the CAMS services, please add the website and the paper from Marécal which is use further along in the paper.

Done (page 2, line 25)

- p2 line 30, MODIS is now also available in a 1x1 km product (MAIAC)

Done (page 3, line 6)

- p4, line 10-11 this sentence is unclear to me, do you mean by combining AOD and error characteristics?

Done (page 4, lines 22-23)

- p4, line 12, CR, which should represent.....(something like the current situation, the situation without use of the observations)

done (page 4, line 25)

- p4, line 25-26. Also when you are using two different models, you should evaluate this.

Done (page 5, line 5)

- p4, line 27, as MOCAGE is used for both....

Done (page 5, line 7)

- p7, line 20, FGE is also used

Done

- Figure 2, I find it very hard to see the NR background in central Europe with all the overlying circles and the small plots. It is mentioned that the variability and maxima are well represented, but I cannot evaluate this when I do not see the background.

The figures have been zoomed in for better clarity.

- p8, lines 20-24. The underestimation is indeed common, I do think there are many more possible reasons for this, such as underestimation of emissions in cold winter periods, and perhaps the modelling of stable winter conditions with shallow surface layers.

A sentence has been added (page 8, lines 13-15).

- P8, line 16: maxima, I would change this word, as I relate maxima to the absolute maximum values, while I think you mean the location of the maximum values.

Done (page 8, line 2)

- p12, line 5 slowest → slower

Done (page 10, line 24)

- p13, line 2, especially the CR4: but the bias for CR4 is quite small....

It is rather CR3, which is more different to the NR than CR4. The text has been changed accordingly (page 11, line 25).

- p13, line 24, here the purpose of the paper is mentioned, but this should be stated more clearly in the introduction, especially the focus on the continental scale

done (page 3, line 29; page 4, lines 13-14)

- p14, line 25-28 Figure 14 versus figure 12, I found it hard to see the improvement, while a large

*improvement is mentioned, maybe it would be helpful to direct the reader to some specific areas where it is visible. Tables 9 and 10 are clear but only cover central Europe.*

Done (page 13, lines 19-21)

*- p15, lines 5-10 please add here the discussion of AOD-PM relation as suggested in the general Comments*

Done (page 13, lines 30-31), and also in Section 6.

*- p15, line 29-20, what is meant with high spatial and temporal episode?*

Correction done (page 14, line 23)

*- p16, summary, please also add the case where it does not work (simulation 4 at the surface, averaged over whole domain).*

Done (page 17, line 15)

We thank again the reviewers for their insightful and constructive comments, which have led to improvements to the manuscript. Besides, we have completed some additional changes regarding format, particularly in the references.



Mis en forme : Anglais (États Unis)

## Monitoring aerosols over Europe: an assessment of the potential benefit of assimilating the VIS04 measurements from the future MTG/FCI geostationary imager

5 Maxence Descheemaeker<sup>1</sup>, Matthieu Plu<sup>1</sup>, Virginie Marécal<sup>1</sup>, Marine Claeysman<sup>2</sup>, Francis Olivier<sup>2</sup>, Youva Aoun<sup>3</sup>, Philippe Blanc<sup>3</sup>, Lucien Wald<sup>3</sup>, Jonathan Guth<sup>1</sup>, Bojan Sič<sup>1</sup>, Jérôme Vidot<sup>4</sup>, Andrea Piacentini<sup>5</sup>, Béatrice Josse<sup>1</sup>

1CNRM, [Université de Toulouse](#), Météo-France, [CNRS](#), Toulouse, France

2Thales Alenia Space, Cannes la Bocca, 06156, France

10 3Mines ParisTech, PSL Research University, O.I.E.- Center for Observation, Impacts, Energy, Sophia Antipolis, 06904, France

4Centre de Météorologie Spatiale, Météo-France, 22300, Lannion, France

5CERFACS – CNRS, UMR5318, 31057, Toulouse, France

*Correspondence to:* Maxence Descheemaeker (maxence.descheemaeker@meteo.fr)

Supprimé: - CNRS, UMR3589, 31057,

15 **Abstract.** The study assesses the possible benefit of assimilating Aerosol Optical Depth (AOD) from the future spaceborne sensor FCI (Flexible Combined Imager) for air quality monitoring in Europe. An Observing System Simulation Experiment (OSSE) was designed and applied over a 4-month period that includes a severe pollution episode. The study focuses on the FCI channel centred at 444 nm, which is the shortest wavelength of FCI. A Nature Run (NR) and four different Control Runs of the MOCAGE chemistry-transport model were designed and evaluated to guarantee the robustness of the OSSE results. 20 The AOD synthetic observations from the NR were disturbed by errors that are typical of the FCI. The variance of the FCI AOD at 444 nm was deduced from a global sensitivity analysis that took into account the aerosol type, surface reflectance and different atmospheric optical properties. The experiments show a general benefit on all statistical indicators of the assimilation of the FCI AOD at 444 nm for aerosol concentrations at surface over Europe, and also a positive impact during the severe pollution event. The simulations with data assimilation reproduced spatial and temporal patterns of PM<sub>10</sub> concentrations at surface better than without assimilation all along the simulations and especially during the pollution event. 25

[The advantage of assimilating AOD from a geostationary platform over a Low Earth Orbit satellite has also been quantified.](#)

This work demonstrates the capability of data from the future FCI sensor to bring an added value to the MOCAGE aerosol simulations, and in general, to other chemistry transport models.

Supprimé: s

## 1 Introduction

Aerosols are liquid and solid compounds suspended in the atmosphere, whose sizes range from a few nanometers to several tens of micrometers, and whose lifetime in the troposphere varies from a few hours to a few weeks (Seinfeld and Pandis, 1998). Stable sulfate aerosols at high altitude can last for years (Chazette et al., 1995). The sources of aerosols may be natural (dusts, sea salt, ashes from volcanic eruptions, for instance) or anthropogenic (from road traffic, residential heating, industries, for instance), and they can be transported up to thousands of kilometers. Aerosols are known to have significant impacts on climate (IPCC, 2007) and on air quality and further on human health as WHO (2014) estimated over 3 million deaths in 2012 to be due to aerosols.

Aerosols absorb and diffuse solar radiation, which leads to local heating of the aerosol layer and cooling of the climate system through the backscatter of solar radiation to space for most of the aerosols, except for black carbon (Stocker et al., 2013). The absorption of solar radiation modifies the vertical temperature profile, affecting the stability of the atmosphere and cloud formation (Seinfeld and Pandis, 1998). Aerosols, as condensation nuclei, play a significant role in the formation and life cycle of clouds (Seinfeld and Pandis, 1998). Deposition of aerosols on Earth's surface may also affect surface properties and albedo. All these effects show that aerosols play a key role on the energy budget of the climate system.

Aerosols, also called particulate matter in the context of air quality, are responsible for serious health problems all over the world, as they are known to favor respiratory and cardiovascular diseases as well as cancers (Brook et al., 2004). The World Health Organization (WHO) has set regulatory limits for aerosol concentrations, respectively  $20 \mu\text{g}\cdot\text{m}^{-3}$  and  $10 \mu\text{g}\cdot\text{m}^{-3}$  annual mean for  $\text{PM}_{10}$  and  $\text{PM}_{2.5}$  (particulate matter with a diameter less than 10 and 2.5  $\mu\text{m}$ , respectively) concentrations. The European Union regulation introduces also  $\text{PM}_{10}$  daily mean limits of  $50 \mu\text{g}\cdot\text{m}^{-3}$ . The presence of a dense layer of aerosols can also affect air traffic by the reduction of visibility (Bäumer et al., 2008) and by risks of disruptions of engines of air planes (Guffanti et al., 2010). Therefore, it is essential to accurately determine the evolution of the concentration and size of the different types of aerosols in space and time, in order to assess their effect on climate and on air quality and to mitigate their impacts. A pertinent approach to achieve a continuous and accurate monitoring of aerosols is to combine measurements and models, a good example being the Copernicus Atmosphere Monitoring Service (CAMS) (<http://www.atmosphere.copernicus.eu/>; Peuch and Engelen, 2012; Eskes et al., 2015; Marécal et al., 2015).

Ground-based stations, which measure aerosol and gas concentrations in-situ, have been used for several decades to monitor air quality, such as the stations in the Air Quality e-Reporting program (AQeR, <https://www.eea.europa.eu/data-and-maps/data/aqereporting-2>) from the European Environment Agency (EEA). Other observations can also be used to measure aerosols. The AERONET (AErosol RObotic NETwork) program (<https://aeronet.gsfc.nasa.gov/>) performs the retrieval of the Aerosol Optical Depth (AOD) at several ground stations (Holben et al., 1998). Similarly, AOD observations can be retrieved from images taken in different channels by imagers aboard Low Earth Orbit (LEO) or GEOstationary (GEO) satellites. Generally, AOD from satellite provides a better spatial coverage than ground-based stations at the expense of additional sources of uncertainty, such as the surface reflectance. An example of AOD product from LEO satellites is the Daily Level 2

Mis en forme : Anglais (États Unis),  
Indice

Mis en forme : Anglais (États Unis)

AOD, from the Moderate Resolution Imaging Spectroradiometer (MODIS) (Levy et al., 2013) sensor on board Terra and Aqua (MOD 04 & MYD 04 products). This AOD product is provided at a 10 km resolution every 5 min, down to 1 km. Sensors on geostationary orbit satellites can continuously scan one third of Earth's surface much more frequently than low Earth orbit satellites. The SEVIRI (Spinning Enhanced Visible and Infra-Red Imager) sensor, aboard MSG (Meteosat Second Generation), is an example of a GEO sensor providing information on aerosols. Different AOD are retrieved over lands from SEVIRI data in the VIS0.6 and VIS0.8 channels, respectively centered at 0.635  $\mu\text{m}$  (0.56  $\mu\text{m}$  – 0.71  $\mu\text{m}$ ) and 0.81  $\mu\text{m}$  (0.74  $\mu\text{m}$  – 0.88 $\mu\text{m}$ ). AOD products are retrieved following different methods. Carrer et al. (2010) presented a method to estimate a daily quality-controlled AOD based on a directional and temporal analysis of SEVIRI observations of channel VIS0.6. Another method consists in matching simulated Top Of the Atmosphere (TOA) reflectances (from a set of 5 models) with TOA SEVIRI reflectances (Bernard et al., 2011) to obtain an AOD for VIS0.6. Another method (Mei et al., 2012) estimates the AOD and the aerosol type by analysing the reflectances at 0.6 and 0.8  $\mu\text{m}$  in three orderly scan times. These methods derive AOD for specific channels, from the combined analysis of several channels and very often using several images if not all of a day to have information.

Numerical models, even if they are subject to errors, are necessary to describe the variability of the aerosol types and of their concentrations with space and time, as a complement to observations. Aerosol forecasts on regional and global scales are made by three-dimensional models, such as the chemistry-transport model (CTM) MOCAGE (Sič et al., 2015; Guth et al., 2016). MOCAGE is currently used daily to provide air quality forecasts to the French platform Prev' Air (Rouil et al., 2009) and also to the European CAMS ensemble (Marécal et al., 2015). Data assimilation of AOD can be used in order to improve the representation of aerosols within the model simulations (Benedetti et al. 2009, Sič et al, 2016). Studies on geostationary sensors have also proved a positive effect of the assimilation of AOD, see e.g. Yumimoto, et al. (2016), who assessed this positive effect using the AOD at 550 nm from AHI (Advanced Himawari Imager) sensor aboard Himawari-8.

The future geostationary Flexible Combined Imager (FCI, URD Eumetsat, 2010), that will be aboard the Meteosat Third Generation satellite (MTG), will perform a full disk in 10 min, and in 2.5 min for the European Regional-Rapid-Scan which covers one-quarter of the full disk, with a spatial resolution of 1 km at nadir and around 2 km in Europe. Like AHI, FCI is designed to have multiple wavelengths and the assimilation of its data into models should be beneficial to aerosol monitoring. The aim of the paper is to assess the possible benefit of assimilating measurements from the future MTG/FCI sensor for monitoring aerosols on regional scale over Europe. Since MOCAGE cannot assimilate AOD at multiple wavelengths simultaneously (Sič et al, 2016), the study focusses on the assimilation of AOD from a single channel. Among the 16 channels of FCI, the VIS04 band (centered at 444 nm) has been chosen because it covers the shortest wavelengths, which is expected to be the most relevant to detect small particles (Petty, 2006). Besides, VIS04 is a new channel compared to MSG/SEVIRI, which shortest band is around 650nm (Carrer et al, 2010), and so assessing the benefit of VIS04 over Europe is original.

**Déplacé vers le bas [8]:** Other studies have shown the positive impact of assimilating synthetic aerosol data from future geostationary instruments in preparation of new satellite sensors. Timmermans et al (2009) presented the results of assimilating synthetic AOD together with ground-based PM<sub>2.5</sub> measurements and showed a positive impact on the estimation of surface PM<sub>2.5</sub> concentrations. Claeys et al. (2011) also used an observing systems simulation experiments (OSSE) approach to evaluate the benefit of geostationary instruments to monitor gas pollutant concentrations in the lowermost troposphere.

- Supprimé: ¶
- Supprimé:
- Supprimé: This
- Supprimé: es
- Supprimé: of
- Supprimé: the
- Supprimé: , as the channel VIS04 is new compared to the present SEVIRI sensor, and besides, a short wavelength is
- Supprimé: re accurate
- Supprimé: , such as PM<sub>2.5</sub>, than longer wavelengths

As FCI is not yet operational, an OSSE (Observing System Simulation Experiments) approach (Timmermans et al., 2015) is used in this study. In an OSSE, synthetic observations are created from a numerical simulation that is as close as possible to the real atmosphere (the Nature Run), and then are assimilated in a different model configuration. The differences between model outputs with and without assimilation provide an assessment of the added value of the assimilated data. OSSE have been widely developed and used for assessing and designing future sensors for air quality monitoring: for carbon monoxide (Edwards et al, 2009) and ozone (Claeyman et al, 2011; Zoogman et al, 2014) from LEO or GEO satellites (Lahoz et al, 2012), and for aerosol analysis from GEO satellites over Europe (Timmermans et al, 2009a, 2009b). Some of these studies have successfully assessed the potential benefit of future satellites and they have helped to design the instruments (Claeyman et al, 2011), however cautions and limitations on the OSSE for air quality have been addressed (Timmermans et al, 2009a, 2009b, 2015), such as the “identical twin problem” and the control of the boundary conditions of the model, and the accuracy and the representativeness of the synthetic observations.

By designing an OSSE that takes into account these precautions, the present study proposes a quantitative assessment of the potential benefit of assimilating AOD at 444 nm from FCI for aerosol monitoring in Europe. The OSSE and its experimental setup are described in Sect. 2. Then, the case study and an evaluation of the ability of the reference simulation to represent a true state of the atmosphere are presented. The calculation of synthetic observations is explained in Sect. 3. An evaluation of the control simulations is made in Sect. 4. In Sect. 5, the results of the assimilation of FCI synthetic observations are presented and discussed. Finally, Sect. 6 concludes this study.

## 2 Methodology

### 2.1 Experimental setup

Figure 1 shows the general principle of the OSSE (Timmermans et al, 2015). A reference simulation, called “Nature Run” (NR) is assumed to represent the “true” state of the atmosphere. AOD synthetic observations are generated by combining AOD retrieved from the NR and the error characteristics of FCI. These error characteristics are described in Sect. 3. The second kind of simulations in the OSSE is the “Control Run” (CR) simulation. The differences between NR’s output and CR’s output should represent the errors of current models without use of observations. Finally, the assimilation run (AR) is done by assimilation in the CR of the synthetic observations. To assess the added value of the instrument, a comparison is made between the output of the AR and the NR and between the CR and the NR. If the AR is closer to the NR than the CR, it means that the observations provide useful information to the assimilation system. The differences between AR and CR quantify the added value of the instrument.

The NR should be as close as possible to the actual atmosphere because it serves as the reference to produce the synthetic observations. The temporal and spatial variations of the NR should approximate those of actual observations. An evaluation

**Supprimé:** this sensor

**Supprimé:**

**Supprimé:** study to assess its ability to improve the aerosols analysis, by assimilation of 444 nm AOD

**Supprimé:** The general principle of OSSEs (Observing System Simulation Experiments) is to assess the added value of future sensor

**Supprimé:** s by assimilating synthetic observations in different simulations. Other studies have shown the positive impact of assimilating synthetic aerosol data from future geostationary

**Déplacé (insertion) [8]**

**Supprimé:** instruments in preparation of new satellite sensors. Timmermans et al (2009) presented the results of assimilating synthetic AOD together with ground-based PM<sub>2.5</sub> measurements and showed a positive impact on the estimation of surface PM<sub>2.5</sub> concentrations. Claeyman et al. (2011) also used an observing systems simulation experiments (OSSE) approach to evaluate the benefit of geostationary instruments to monitor gas pollutant concentrations in the lowermost troposphere.

**Mis en forme :** Anglais (États Unis), Surlignage

**Mis en forme :** Anglais (États Unis)

**Supprimé:** AOD synthetic observations from FCI VIS04 will be assimilated in MOCAGE.¶

**Mis en forme :** Anglais (États Unis)

**Supprimé:** is explained

**Supprimé:** It contains a description of the OSSE, of the MOCAGE model, and its assimilation system.

**Supprimé:** from the addition of

**Supprimé:** approximate those between a state-of-the-art model and the actual atmosphere

of the NR, presented in Sect. 2.2, includes a comparison of the model with aerosol concentrations and AOD data from ground-based stations.

In addition, the differences between the NR and the CR must be significant and approximate those between the CR and the actual observations. Ideally, the NR and CR should be run with different models, as the use of the same model could lead to over-optimistic results (Masutani et al., 2010); this issue is called the “identical twin” problem. It is strongly recommended to evaluate the spatio-temporal variability of the NR and its differences with the CR to avoid this “identical twin” problem (Timmermans et al., 2015). As MOCAGE is used for both NR and CR in the present study, a method similar to that used in Claeys et al. (2011) is proposed. Instead of one CR, various CR simulations (Fig. 1) are performed in different configurations, and they are assessed independently and compared to the NR to ensure the robustness of the OSSE results. An evaluation of those differences is presented in Sect. 4.

## 2.2 MOCAGE

The CTM model used in this study is MOCAGE (Modèle de Chimie Atmosphérique à Grande Echelle, Guth et al, 2016), that has been developed for operational and research purposes. MOCAGE is a three-dimensional model that covers the global scale, down to regional scale using two-way nested grids. MOCAGE vertical resolution is not uniform: the model has 47 vertical sigma-hybrid altitude-pressure levels from the surface up to 5 hPa. Levels are denser near the surface, with a resolution of about 40 m in the lower troposphere and 800 m in the lower stratosphere.

MOCAGE simulates gases (Josse et al., 2004; Dufour et al., 2004), primary aerosols (Martet et al., 2009; Sič et al., 2015) and secondary inorganic aerosols (Guth et al, 2016). Aerosols species in the model are primary species: desert dust, sea salt, black carbon and organic carbon, and secondary inorganic species: sulfate, nitrate and ammonium, formed from gaseous precursors in the model. For each type of aerosols (primary and secondary), the same 6 bin sizes are used between 2 nm and 50 μm: 2 nm -10 nm - 100 nm - 1 μm - 2.5 μm - 10 μm - 50 μm. All emitted species are injected every 15 mins in the five lower levels (up to 0.5 km), following an hyperbolic decay with altitude: the fraction of pollutants emitted in the lowest level is 52 %, and then respectively 26 %, 13 %, 6 % and 3 % in the four levels above. Such a vertical repartition ensures continuous concentration fields in the first levels, which guarantee a proper behavior of the of the semi-Lagrangian advection scheme. Carbonaceous particles are emitted using emission inventories. Sea salt emissions are simulated using a semi-empirical source function (Gong, 2003; Jaeglé et al., 2011) with the wind speed and the water temperature as input. Desert dust are emitted, using wind speed, soil moisture and surface characteristics based on Marticorena and Bergametti (1995) which give the total emission mass, that is then distributed in each bin according to Alfaro et al. (1998). Secondary inorganic aerosols are included in MOCAGE using the module ISORROPIA II (Fountoukis and Nenes, 2007), which solves the thermodynamic equilibrium between gaseous, liquid and solid compounds. Chemical species are transformed by the RACMOBUS scheme, which is a combination of the RACM scheme (Regional Atmospheric Chemistry Mechanism; Stockwell et al., 1997) and the REPROBUS scheme (Reactive Processes Ruling the Ozone Budget in the Stratosphere;

Supprimé: In the case of using the same model, i

Supprimé: both

Supprimé: all

Supprimé: s

Supprimé: u

Lefèvre et al., 1994). Dry and wet depositions of gaseous and particulate compounds are parameterized as in Guth et al. (2016).

Supprimé: made

MOCAGE uses meteorological forecasts (wind, pressure, temperature, specific humidity, precipitation) as input, such as Météo-France operational meteorological forecast from ARPEGE (Action de Recherche Petite Echelle Grande Echelle), or ECMWF (European Centre for Medium-Range Weather Forecasts) meteorological forecast from IFS (Integrated Forecast System). A semi-lagrangian advection scheme (Williamson and Rasch, 1989), a parameterization for convection (Bechtold et al., 2001) and a diffusion scheme (Louis, 1979) are used to transport gaseous and particulate species.

Supprimé: n...rangian advection { ... [1]

### 2.3 Assimilation system PALM

The assimilation system of MOCAGE (Massart et al., 2009), is based on the 3-Dimensional First Guess at Appropriate Time (3D-FGAT) algorithm. This method consists of minimizing the cost function  $J$ :

Supprimé: 2005;

$$J(\delta x) = J_b(\delta x) + J_o(\delta x) = \frac{1}{2}(\delta x)^T \mathbf{B}^{-1} \delta x + \frac{1}{2} \sum_{i=0}^N (d_i - \mathbf{H}_i \delta x)^T \mathbf{R}_i^{-1} (d_i - \mathbf{H}_i \delta x), \quad (1)$$

Mis en forme ... [2]

where  $J_b$  and  $J_o$  are respectively the part of the cost function related to the model background and to the observations;  $\delta x = x - x^b$  is the difference between the model background  $x^b$  and the state of the system  $x$ ;  $d_i = y_i - H_i x^b(t_i)$  is the difference between the observation  $y_i$  and the background  $x^b$  in the observations space at time  $t_i$ ;  $H_i$  is the observation operator;  $\mathbf{H}$  its linearized version;  $\mathbf{B}$  is the background covariance matrix; and  $\mathbf{R}_i$  is the observation covariance matrix at time  $t_i$ .

The general principal for the assimilation of AOD (Benedetti et al., 2009) is the same as in Sič et al. (2016). The control variable  $x$  used in the minimization is the 3D total aerosol concentration. After minimization of the cost function, an analysis increment  $\delta x^a$ , is obtained, which is a 3D-total aerosol concentration. This increment  $\delta x^a$  is then converted into all MOCAGE aerosol bins according to their local fractions of the total aerosol mass in the model background. The result is added to the background aerosol field at the beginning of the cycle. Then the model is run over the 1-hour cycle length to obtain the analysis. The state at the end of this cycle is used as a departure point for the background model run of the next cycle.

Supprimé:

The observation operator  $\mathbf{H}$  for AOD uses as input the concentrations of all bins (6) of the seven types of aerosols and the associated optical properties. For this computation also, the control variable  $x$  is converted into all MOCAGE aerosol bins according to their local fractions of the total aerosol mass in the model background. The AOD is computed for each model layer to obtain, by summing, the AOD of the total column. The optical properties of the different aerosol types are issued from a look-up table, that is computed from the Mie code scheme of Wiscombe (1980, 1979, revised 1996) for spherical and homogeneous particles. The refractive indices come from Kirchstetter et al. (2004) for organic carbon and from the Global Aerosol Data Set (GADS, Köpke et al., 1997) for other aerosol species. The hygroscopicity of sea salts and secondary inorganic aerosols are taken into account based on Gerber (1985).

Supprimé: is computation is base( ... [3]

While the observation operator is designed to assimilate AOD of any wavelength from the UV to the IR, the assimilation system MOCAGE-PALM cannot assimilate data of several wavelengths simultaneously (Sič et al., 2016). This limitation is

due to the choice of the control vector, which is the 3D total aerosol concentration: assimilating different wavelengths simultaneously would require to rethink and to extend the control vector, for instance splitting it by aerosol size bins or types. This explains why the study focuses on the assimilation of AOD of a single wavelength.

## 2.4 Case study

The period extends from the 1<sup>st</sup> of January to the 30<sup>th</sup> of April 2014, and includes several days of PM pollution over Europe. From the 7<sup>th</sup> to 15<sup>th</sup> of March, a secondary particles episode (EEA report 2014) occurs, while from 29<sup>th</sup> March to 5<sup>th</sup> April a dust plume originating from the Sahara Desert propagates Northwards to Europe (Vieno et al., 2016).

The MOCAGE simulation covers the whole period from January to April 2014, on a global domain at 2° resolution and a nested regional domain, that covers Europe, from 28 °N to 72 °N and from 26 °W to 46 °E, at 0.2 ° resolution (see Fig. 2). A 4-month spin-up is made before the simulation. The NR is forced by ARPEGE meteorological analysis. Emissions of chemical species in the global domain come from MACCity (van der Werf et al., 2006; Lamarque et al., 2010; Granier et al., 2011), for anthropogenic gas species and biogenic species are from GEIA for the global and regional domain. ACCMIP project emissions are used for anthropogenic organic and black carbon emissions at the global scale. The TNO-MACC-III inventory for year 2011 provides anthropogenic emissions in the regional domain. TNO-MACC-III emissions are the latest update of the TNO-MACC inventory based on the methodology developed in the MACC-II project described in Kuenen et al. (2014). These anthropogenic emissions are completed, on our regional domain, at the boundary of the MACC-III inventory domain by emissions from MACCity. Daily biomass burning sources of organic and black carbon and gases from the Global Fire Assimilation System (GFAS) (Kaiser et al., 2012) are injected in the model. The NR includes secondary organic aerosols (SOA) in order to enhance its realism and to well fit the observations made at ground-based stations over Europe. Standard ratios from observations (Castro et al., 1999) are used to simulate the portion of secondary carbon species, 40 % in winter, from the primary carbon species in the emission input.

The NR is compared to real observations from AERONET AOD observations and AQeR surface concentrations, using common statistical indicators: mean bias (B), modified normalized mean bias (MNMB), root mean square error (RMSE), fractional gross error (FGE), Pearson correlation coefficient ( $R_p$ ) and Spearman correlation coefficient ( $R_s$ ). While the Pearson correlation measures the linear relation between the two datasets, the Spearman correlation is a mean to assess their monotonic relationship.

The AQeR stations are mainly located over Western Europe (Fig. 2). After selection of the surface stations that are representative of background air pollution (following Joly and Peuch, 2012), 597 and 535 stations are respectively used for the PM<sub>10</sub>, PM<sub>2.5</sub> comparison. Figure 2 represents the mean surface concentration of the NR and selected AQeR measurements over the domain, from January to April 2014. The left panel shows the PM<sub>10</sub> concentrations of the NR in the background and the AQeR concentrations as circle, while the right panel shows the PM<sub>2.5</sub> concentrations. The concentration

Supprimé: ; Diehl et al., 2012... [4]

Mis en forme : Anglais (États Unis)

Supprimé: has been improved, by introducing

Mis en forme : Anglais (États Unis)

Supprimé: into the model, to

Mis en forme : Anglais (États Unis)

Supprimé: 8

Supprimé: several ...statistical ind[... [5]

Mis en forme [6]

Supprimé: is defined as:¶

$$MNMB = \frac{2}{N} \sum_{i=1}^N \frac{f_i - o_i}{f_i + o_i}, (4) .$$

and varies between - 2 and 2.¶

The

Mis en forme [7]

Supprimé: R...ot mM...an sS...u[... [8]

Mis en forme [9]

Supprimé: the F...ractional G...ross

E...rror (FGE) is used in this study. It is

defined as:¶

$$FGE = \frac{2}{N} \sum_{i=1}^N \frac{|f_i - o_i|}{f_i + o_i}, (5) .$$

and varies between 0 and 2.¶

Another indicator is the factor of 2

(FactOf2), which represents the fraction of

the forecast dataset ranged within a factor

of 2 from the observation dataset. [10]

Supprimé: ¶

The ...earson correlation coefficient ( $R_p$ )

and is often used to measure the extent to

which patterns in the forecast dataset match

those in the observation dataset in a linear

aspect. It ranges from -1 to 1 and has the

following formula:¶

$$R_p = \frac{\sum_{i=1}^N (f_i - \bar{f})(o_i - \bar{o})}{N \sigma_f \sigma_o}, (6) .$$

where  $\bar{f}$  and  $\bar{o}$  are the means of the datasets

and  $\sigma_f$  and  $\sigma_o$  are the standard dev[... [12]

Mis en forme [11]

Mis en forme [13]

Supprimé: a...monotonic relationship

between the datasets... If  $r_g$  denot[... [14]

Mis en forme [15]

Supprimé: (8) .

Mis en forme : Anglais (États Unis)

Supprimé: Stations, classified as 1 to 5,

have been selected following Joly [16]

of the NR  $PM_{10}$  and  $PM_{2.5}$  are generally underestimated compared to observations. Nevertheless, on both figures, the spatial variability and particularly the location of maxima are reasonably well represented. Over the European continent, the NR and AQeR data show clear maxima in the center of Europe for both  $PM_{10}$  and  $PM_{2.5}$  concentrations, even if the NR underestimates these maxima.

Table 1 shows the statistical indicators of this comparison for hourly surface concentrations in  $PM_{10}$  and  $PM_{2.5}$ . A negative mean bias is observed, around  $-6.23 \mu\text{g}\cdot\text{m}^{-3}$  ( $\sim -35.1\%$ ) for  $PM_{10}$  and  $-3.20 \mu\text{g}\cdot\text{m}^{-3}$  ( $\sim -24.7\%$ ) for  $PM_{2.5}$ . The RMSE is equal to  $16.2 \mu\text{g}\cdot\text{m}^{-3}$  for  $PM_{10}$  and  $11.9 \mu\text{g}\cdot\text{m}^{-3}$  for  $PM_{2.5}$  while the FGE equals to 0.56 and 0.543. The factor of two is equal to 64.7 % and 67.5 % for  $PM_{10}$  and  $PM_{2.5}$ . Pearson and Spearman correlations are respectively 0.452 and 0.535 for  $PM_{10}$  and  $PM_{2.5}$  and 0.537 and 0.602 for  $PM_{10}$  and  $PM_{2.5}$ . The NR underestimation is greater for  $PM_{10}$  than for  $PM_{2.5}$  in relative differences.

This suggests a lack of aerosol concentrations in the  $PM_{10-2.5}$  (concentration of aerosols between  $2.5 \mu\text{m}$  and  $10 \mu\text{m}$ ). Not taking into account wind-blown crustal aerosols may cause a potential underestimation of PM in models (Im et al., 2015). Taking them into account needs a detailed ground type inventory to compute those emissions unavailable in MOCAGE. For  $PM_{2.5}$ , the underestimation of aerosol concentrations can be due to a lack of carbonaceous species (Prank et al., 2016). Other possible reasons for PM negative bias at surface are the underestimation of emissions in cold winter period and the uncertainty in the modelling of stable winter conditions with shallow surface layers.

A time-series graph of the median NR surface concentrations and the median surface concentrations of the AQeR stations are presented in Fig. 3. Compared to ground-based AQeR data (in black), the NR (in purple) generally underestimates the  $PM_{10}$  and the  $PM_{2.5}$  concentrations, especially during the 7<sup>th</sup>-15<sup>th</sup> March pollution episode. However, the variations and maxima of the NR concentrations of PM are generally well represented. Furthermore, around 65 % of model concentrations are relatively close to observations as shown by the factor of 2 in Table 1. The variability of NR concentrations is thus consistent with AQeR station concentrations.

Table 2 gives an evaluation of the NR against the daily mean of the AOD at 500 nm obtained from 84 AERONET stations in the regional domain from January to April 2014. The statistical indicators show good consistency between the NR and AERONET observations. However, like the results showed at global scale (Sič et al., 2015), MOCAGE tends to overestimate AOD: although small, the AOD bias is positive. While PM concentrations at surface are underestimated in the NR, different reasons may explain an overestimation of AOD. The vertical distribution of aerosol concentrations in the model is largely controlled by vertical transport, removal processes and by the prior assumptions done on the aerosol emission profiles. However, these processes may have large variability and they are prone to large uncertainties (Sič et al., 2015). Another possible explanation is the uncertainty of the size distribution of aerosols that can affect significantly the optical properties. More generally, the assumptions that underly the computation of optical properties are largely uncertain and they can affect the computation of AOD by a factor of 50% (Curci et al., 2015): the mixing state assumption, the uncertainty on refractive indices and on hygroscopicity growth. These uncertainties on aerosol vertical profiles, size distribution, and optical properties may explain the decorrelation between AOD and PM concentrations at surface, and so why the MOCAGE NR has a positive

Supprimé: a bit

Supprimé: , even if the NR tends to overestimate AOD.

Supprimé: uncertainty of the

Supprimé: in the NR may explain this overestimation. The overestimation may also be due to uncertainties of the most important parameters in the computation of the AOD for each level layer, namely, the refractive index, density, hygroscopicity and the mixing state. The mixing state is a property of particles to be arranged in different chemical configurations across the particle population. As mentioned above, particles in MOCAGE are separated in individual species and in 6 bins and assumed to be spherical and homogeneous. Curci et al. (2015) studied the impact of the refractive index, density, hygroscopicity and the mixing state on simulated optical properties by comparing observations to models from the Air Quality Model Evaluation International Initiative (AQMEII-2). An estimation of uncertainties due to the assumption of the mixing state is calculated at 30-35 % on simulated AOD, while uncertainties from other parameters are around 10 %.

Supprimé: Thos

Supprimé: could



bias in AOD while underestimating PM at surface. However, both the PM and AOD correlation errors of the NR remain in a realistic range.

As a result, the NR simulation exhibits surface concentrations and AOD in the same range compared to those from ground-based stations and shows similar spatial and temporal variations, which makes the NR acceptable for the OSSE.

### 3 Generation of synthetic AOD observations

The study focuses on the added value of assimilating AOD at the central wavelength (444 nm) of the FCI/VIS04 spectral band. Since the assimilation of AOD from several wavelengths simultaneously is not possible (Sect. 2.3), the choice of the single channel VIS04 is mainly driven by the fact that it is the shortest wavelengths of FCI, that is a priori the most favorable to the detection of fine particles.

Thus, synthetic AOD observations at 444nm are created over the MOCAGE simulated regional domain, from the NR simulation 3D fields: all aerosol concentrations per type and per size bins, and meteorological variables. At every gridpoint of the NR regional domain where the solar zenithal angle is below 80° (daytime) and where clouds are absent, an AOD value at 444 nm is computed using the MOCAGE observation operator described above (Sect. 2.3). In order to take into account the error characteristics of the FCI VIS04 AOD, a random noise is then added to this NR AOD value.

To estimate the variance of this random noise, the general principle is to assess and quantify the respective sensitivity of the FCI VIS04 top-of-the-atmosphere reflectance to AOD and to the other variables. For doing this, the FCI simulator developed by Aoun et al (2016), based on the Radiative Transfer Model (RTM) libRadtran (Mayer and Killings, 2005), has been used. This simulator computes the reflectance in the different spectral bands of FCI, as a function of different input atmospheric parameters (AOD,  $\tau$ , total column water vapor, ozone content), ground albedo  $\rho_g$ , and solar zenithal angle  $\theta_s$  for different OPAC (Optical Properties of Aerosols and Clouds, Hess et al., 1998) aerosol types: dust, maritime clean, maritime polluted, continental clean, continental average, continental polluted, and urban.. The FCI simulator takes into account the spectral response sensitivity and the measurement noise representative of the FCI VIS04 spectral band (415-475 nm).

By applying a Global Sensitivity Analysis to this FCI simulator ran on a large dataset (see the Appendix for the details of the method), a look-up table of the RMSE of AOD is derived. It depends on the OPAC type, on the relative error of surface albedo, on the solar zenithal angle and of the ground albedo value. The classification of each MOCAGE profile into the OPAC types relies on three parameters (Tab. 3): the surface concentration, the main surface species and the proportion in relation to the total aerosols concentrations. A species is described as a main species if its concentrations, [species], is above each other concentrations, for example DD is a main species if [DD]>[SS] & [DD]>[IWS]. An example of NR profiles (7<sup>th</sup> March 2014 at 12 UTC) decomposed in OPAC type is presented in Fig. 4. A small part of the profiles are dismissed where MOCAGE profiles do not match one of the OPAC types, such as profiles over ocean where IWS (Insoluble, Water Soluble and Soot; Tab. 3) is greater than DD (Desert Dust) and SS (Sea Salt). A larger part of profiles are dismissed because of

**Supprimé:** the overestimation of the AOD from the NR, even if the surface concentration of the PM<sub>10</sub> of the NR is underestimated. Another explanation of the overestimation of AOD is an overestimation of particulate matters larger than 10 μm (and therefore not include in the PM<sub>10</sub> comparison) which cause higher AOD.

**Supprimé:** S...ynthetic AOD ... [17]

**Supprimé:** from the 3D fields of the NR variables: primary organic and black carbon concentrations, desert dust concentrations, sea salt concentrations, secondary inorganic aerosol concentrations (ammonium ... [18]

**Déplacé (insertion) [4]**

**Mis en forme :** Anglais (États Unis)

**Déplacé (insertion) [3]**

**Supprimé:** u..., ozone contents, ... [19]

**Mis en forme** ... [20]

**Supprimé:** s

**Mis en forme** ... [21]

**Supprimé:** s

**Mis en forme :** Anglais (États Unis)

**Supprimé:** It...takes into account ... [22]

**Déplacé (insertion) [1]**

**Déplacé vers le haut [1]:** Si ... [23]

**Supprimé:** Since the FCI respon ... [24]

**Mis en forme** ... [25]

**Supprimé:** The aim of this step ... [26]

**Supprimé:** For each spectral band ... [27]

**Déplacé (insertion) [2]** ... [28]

**Déplacé vers le haut [2]:** nde ... [29]

**Mis en forme** ... [30]

**Déplacé vers le haut [3]:**  $\theta_s$

**Mis en forme** ... [31]

**Déplacé vers le haut [4]:**  $\rho_g$

**Mis en forme** ... [32]

**Déplacé vers le haut [5]:** For ... [33]

**Mis en forme** ... [34]

**Supprimé:** (Table 5) using ... here ... [35]

**Déplacé (insertion) [6]**

**Supprimé:** In order to keep a lar ... [36]

night-time profiles and cloudy conditions. Figure 5 represents the average number of NR AOD that are retained per day for assimilation. After these filters apply, between 10 % and 20 % of profiles are kept every hour. The density of these profiles is higher in the south of the domain, which is directly correlated to the quantity of direct sunlight available. Over the continent, between 1 and 4 profiles can be assimilated per day at each grid-box location.

On every NR profiles that is kept, an AOD error is introduced, by addition of random value from an unbiased Gaussian with a standard deviation derived from the AOD RMSE look-up table, calculated as explained above. The surface albedo fields are taken from MODIS using the Radiative Transfer Model RTTOV (Vidot et al., 2014). A relative error of 10% is assumed for ground albedo, which corresponds to a realistic value (Vidot et al. 2014). An example of the synthetic observations is presented in Fig. 6. It represents the NR AOD, the synthetic observations and the noise applied to NR AOD for the 7<sup>th</sup> March 2014 at 12 UTC.

#### 4 Controls runs (CRs) and their comparison to NR

Sect. 2 showed an evaluation of the NR compared to real observations. Another requirement of the OSSE is the evaluation of differences between the NR and the CR. Various CR simulations have been performed to evaluate the behaviour of the OSSE on different CR configurations and prove its robustness. The NR and CRs use different setups of MOCAGE. The CRs use IFS meteorological forcings, while the NR uses ARPEGE meteorological forcings. The use of different meteorological inputs is expected to yield differences in the transport of pollutant species, and changes in dynamic emissions of sea salt and desert dust. To introduce more differences between the CRs and NR, changes in the emissions are also introduced.

Table 4 indicates the changes made on the different model parameters to create 4 distinct CR simulations. The first control run, CR1, uses the same inputs as the NR except for the meteorological forcings. Other control runs (CR2, CR3, CR4) do not have the SOA formation process of the NR (Sect. 2) and CR1 simulations. Finally, CR3 and CR4 change from other simulations by different vertical repartitions of emissions in the five lowest levels. In CR3, the pollutants are emitted with a slower decay with height than the NR (with repartition from 30 % at surface and respectively 24 %; 19 %; 15 %; 12 % for the four levels above), and in the CR4 emissions are only injected in the lowest level. These changes aim to generate simulations that are more significantly different from the NR than the first two control runs.

The four CRs are compared to the NR for PM<sub>10</sub> and PM<sub>2.5</sub> surface concentration considering virtual observations located at the same locations as the AQeR stations. A time-series of daily means of surface concentrations at simulated stations is presented in Fig. 7, for NR and CRs simulations from the 1<sup>st</sup> January to the 30<sup>th</sup> April 2014. The PM<sub>10</sub> concentrations of the NR (in purple) are mostly greater than the PM<sub>10</sub> concentrations in the CRs. During the period of late March and early April (around the 90<sup>th</sup> day of simulation) the NR concentrations of PM<sub>10</sub> are close to those of the CR2, CR3 and CR4, and less than those of the CR1 by about few μgm<sup>-3</sup>. In terms of PM<sub>2.5</sub>, the CRs concentrations are also underestimating the NR

Supprimé: . Furthermore,

Supprimé: profiles are also dismissed.

Supprimé:

Supprimé: , an

Supprimé: a

Supprimé: s

Supprimé: equal to the RMSE

Supprimé: , depending on the OPAC type

Supprimé: .

**Déplacé vers le haut [6]:** In order to keep a large number of profiles, the criteria are less restrictive than the ones described in Table 4. By this process, a few portions of the profiles will be dismissed, such as profiles over ocean where *IWS* (Insoluble, Water Soluble and Soot; Table 5) is greater than *DD* (Desert Dust) and *SS* (Sea Salt). Furthermore, night-time profiles and cloudy profiles are also dismissed.

Supprimé: 8

Supprimé: relative error

Supprimé: After these filters apply, between 10 % and 20 % of profiles are kept every hour.

Supprimé: Figure 9 represents the average number of profiles, that are available for assimilation, retained per day. The density of these profiles is denser in the south of the domain. This is directly correlated to the quantity of direct sunlight available. Over the continent, between 1 and 4 profiles can be assimilated per day.

Supprimé: 6

Supprimé: (

Supprimé: )

Supprimé: improvement

Mis en forme : Anglais (États Unis)

Supprimé: made in

Mis en forme : Anglais (États Unis)

Supprimé: st

Supprimé: more

Supprimé:

Supprimé: Figure 10

Mis en forme : Anglais (États Unis)

Mis en forme : Anglais (États Unis)

concentration. As for PM<sub>10</sub>, around the 90<sup>th</sup> day of simulation, the concentrations of CR1 are above the concentrations of the NR.

These tendencies can also be observed in Fig. 8, which represents a scatter plot of CRs concentrations as a function of NR concentrations for the daily means of surface concentration in PM<sub>10</sub> and PM<sub>2.5</sub> at the virtual stations. The CR1 concentrations are fairly close to those of the NR concentrations with a coefficient of regression about 0.801 and 0.835 for PM<sub>10</sub> and PM<sub>2.5</sub>. Other CRs underestimate the NR concentrations. This tendency is stronger for PM<sub>10</sub> than for PM<sub>2.5</sub>. The regression coefficient of the CR2, CR3, CR4 are respectively 0.596, 0.583 and 0.607 for PM<sub>10</sub> and 0.570, 0.505 0.647 for PM<sub>2.5</sub>. For both PM<sub>10</sub> and PM<sub>2.5</sub> concentrations, the underestimation is more important for high values of the NR concentrations than for low values.

The statistical indicators in Tab. 5 and 6 are consistent with Fig. 7 and 8. The CR1 is close to the NR with a bias of -1.3 (-8.2 %)  $\mu\text{g.m}^{-3}$  for PM<sub>10</sub> and -0.8 (-6.2 %)  $\mu\text{g.m}^{-3}$  for PM<sub>2.5</sub>. CR4 bias is around -2.9 (-20.5 %)  $\mu\text{g.m}^{-3}$  for PM<sub>10</sub> and -1.8 (-15.1 %)  $\mu\text{g.m}^{-3}$  for PM<sub>2.5</sub>. The two other CRs highly underestimate PM<sub>10</sub> and PM<sub>2.5</sub> concentrations with a bias of -4.5  $\mu\text{g.m}^{-3}$  (-35.2 %) and -3.9  $\mu\text{g.m}^{-3}$  (-37.4 %) respectively for CR2 and -4.8  $\mu\text{g.m}^{-3}$  (-38.1 %) and -4.4  $\mu\text{g.m}^{-3}$  (-42.6 %) for the CR3. These biases are in agreement with the literature. Prank et al. (2016) measure a bias around -5.8 for PM<sub>10</sub> and -4.4  $\mu\text{g.m}^{-3}$  for PM<sub>2.5</sub> for the median of four CTMs against ground-based stations in winter. In Marécal et al. (2015), statistical indicators for an ensemble of seven models are presented for winter. A bias between -3 and -7  $\mu\text{g.m}^{-3}$  is observed for the median ensemble. The PM concentrations of our CRs compared to the NR are characteristic of models compared to observations.

Prank et al. (2016) also show other indicators for the median of models, such as the temporal correlation and the factor of 2. Their correlations are around 0.7 for PM<sub>2.5</sub> and 0.6 for PM<sub>10</sub> and are close to those for our CRs simulations that vary from 0.644 to 0.732 for PM<sub>2.5</sub> and from 0.572 to 0.671 for PM<sub>10</sub>. Their factor of 2 equals 65 % for PM<sub>10</sub> and 67 % for PM<sub>2.5</sub>. The factor of 2 of the CRs ranges between 70 % and 90 % for both PM<sub>10</sub> and PM<sub>2.5</sub> concentrations. The RMSE of CRs simulations ranges from 8  $\mu\text{g.m}^{-3}$  to 10  $\mu\text{g.m}^{-3}$  for PM<sub>10</sub> concentrations, which is slightly under the RMSE of the ensemble from the study of Marécal et al. (2015) which ranges between 10 and 15  $\mu\text{g.m}^{-3}$ . The FGE of the study of Marécal et al. is equal to 0.55, while the FGE of CRs varies from 0.33 to 0.51. Our CRs simulations slightly underestimate the model relative error. Thus, compared to literature, the CRs (especially the CR3) are different enough from the NR to be representative of state-of-the-art simulations.

Between the CRs and the NR there are important spatial differences in surface concentrations of PM, as demonstrated in Fig. 9, which shows the relative differences, Pearson correlation and the FGE for PM<sub>10</sub>. Over the Atlantic Ocean, the CRs concentrations are relatively close to the NR, except for the CR4 which overestimates the concentration of PM<sub>10</sub>. All CRs present high concentrations of PM<sub>10</sub> all over North Africa. This corresponds to high emissions of desert dust over this area, which cause an important overestimation of PM<sub>10</sub> compared to the NR. This overestimation can also be observed around all the Mediterranean Basin. The CRs tend to overestimate the PM<sub>10</sub> concentrations over Spain, Italy, the Alps, Greece, Turkey, the north of the UK, the Iceland and the Norway. The overestimation over the Alps, Iceland and Norway are located at places of negligible concentrations. Over the rest of the European continent, CRs underestimate the concentration of PM<sub>10</sub>,

Supprimé: Figure 11

Mis en forme : Anglais (États Unis)

Mis en forme : Anglais (États Unis)

Supprimé: les

Supprimé: 7

Supprimé: 8

Supprimé: 10

Supprimé: 11

Supprimé: 4

Supprimé: Figure 12 for PM<sub>10</sub>. The

Mis en forme : Anglais (États Unis)

Mis en forme : Anglais (États Unis)

Mis en forme : Anglais (États Unis),  
Indice

Supprimé: are represented in this figure

Mis en forme : Anglais (États Unis)

slightly for CR1, but very pronounced for CR2, CR3 and CR4. The area where the consistency between the CRs and the NR is better is the Atlantic Ocean with a correlation ranging from 0.6 to 0.9 and a low FGE around 0.3. Over the Mediterranean Basin the correlation varies significantly between 0 and 1. Low correlations correspond to high FGE around 1. Over the continent, the correlation varies from 0.4 to 0.9 following a west-east axis. The correlations are slightly greater for CR1 than for the other CRs. The FGE over the continent changes significantly between the CR1 and the other CRs, respectively around 0.35 and 0.55. Similar conclusions can be obtained for the PM<sub>2.5</sub> comparison (see complementary materials). A similar comparison has been done for the AOD between the CRs simulations and the NR simulation (see complementary materials).

In summary, the control runs present spatial variability along with temporal variability. The closest CR to the NR is the CR1. In terms of surface concentrations in PM, the CR3 is the most distant, while in terms of AOD the CR4 is the most distant. Those differences and the use of different CRs, coupled with the realism of the NR, demonstrate the robustness of the OSSE to evaluate the added value provided by AOD derived from the FCI.

### 5 Assimilation of FCI synthetic observations

The purpose of this paper is to assess the potential contribution of FCI VIS04 channel to the assimilation of aerosols on a continental scale. In our OSSE, MOCAGE represents the atmosphere with a horizontal resolution of 0.2° (around 20 km at the equator). Synthetic observations are therefore computed at the model resolution although FCI scans around 1 km resolution at the equator and 2 km over Europe. To fit with the timestep of our assimilation cycle, synthetic observations are also created every hour, although the future FCI imager could retrieve radiance observations every 10 minutes over the globe, and 2.5 minutes over Europe with the European Regional-Rapid-Scan. This means that for each profile of our simulation, only one synthetic observation is available each hour, instead of 24x10x10 at best (FCI scans 24 times an hour, with a spatial resolution 10 times higher than the model over the Europe). The use of one observation for each profile in an assimilation window is due to the assimilation system design that does not allow multiple observations for a same profile. In practice, future FCI observations could be averaged over each MOCAGE profile to reduce the impact of the instrument errors on assimilated observations.

The 3D-FGAT assimilation scheme integrates the synthetic observations described in Sect. 3.

Before assimilation, a **thinning** process is applied to the synthetic observations to keep spatially only 1 pixel out of 4. **Such thinning is useful to reduce the computation time, by accelerating the convergence of the cost function (not shown).** The spatial correlation length of the B background covariance matrix is set to 0.4° in order to have a spatial impact of the assimilation on the simulation while not having multiple coverage of assimilated observations over one profile. **The result of this thinning procedure changes only slightly the assimilated fields but saves significantly computing time.** Assimilation simulations (ARs) are run for all CRs simulations using the same generated set of synthetic observations over the period of 4

Supprimé: ,

Supprimé: especially for

Supprimé: Avoiding over-optimistic results is also a reason to only assimilate one observation (non-averaged).

Supprimé: screening

Supprimé: in order to reach a better

Supprimé: , and to reduce the computation time

months, from the 1<sup>st</sup> of January to the 30<sup>th</sup> of April. The standard deviation of errors used for B and R matrix are estimated respectively at 24 % and 12 %, as in Sič et al. (2016).

To assess the impact of the assimilation of FCI synthetic AOD observations, the CR forecasts and the AR analyses are compared to the assimilated synthetic observations. [Figure 10](#) shows the histograms of the differences between the synthetic observations and the forecast field (in blue) and between synthetic observations and analyzed fields (in purple) for the four ARs simulations. The histograms follow a Gaussian shape, and the distribution of the analyzed values are closer to the synthetic observations than the forecast values. The spread of the histograms is smaller for the analyzed fields than for the forecast fields. The assimilation of synthetic AODs hence improved the representation of AOD fields in the assimilation simulations. Besides, the spatial comparisons between the simulations and the NR show improvements in the AOD fields of simulations by assimilation of the synthetic observations (see supplementary material Fig. S5, S6, S7 and S8). As the increment is applied to all aerosol bins and that PM<sub>10</sub> corresponds to 5 of the 6 bins while PM<sub>2.5</sub> to only 4, we expect better corrections for PM<sub>10</sub> concentrations than for PM<sub>2.5</sub> concentrations.

To validate the results of the OSSEs, the simulations are compared to the reference simulation (NR) over the period. [Figure 11](#) exhibits the spatial differences in surface concentrations of PM<sub>10</sub> between the ARs and the NR. It shows the mean relative bias, the correlation and the FGE for every simulations. Using [Fig. 9](#) as a reference, the relative bias, the FGE and the correlation have been improved over most parts of the domain after assimilation for all simulations. Over the European continent, all simulations show a strong improvement of the statistical indicators. [For instance in CR3, along a line that goes from Spain to Poland, the FGE decreases by about 0.1 after assimilation, in the Eastern part of Europe \(from the Turkey to Finland\), the decrease of FGE is even higher. Over North Africa and the Mediterranean Sea the improvement is intermediate.](#) Nevertheless, the mean bias over the ocean tends to increase for the simulations, especially for [AR4](#). This can also be observed for the PM<sub>2.5</sub> concentration comparison (see supplementary material S1, S2, S3 and S4).

The assimilation of the synthetic observations has a positive impact at each layer of the model. The mean vertical concentrations of PM<sub>10</sub> and PM<sub>2.5</sub> of the different simulations are respectively represented in [Fig. 12 and 13](#), from the surface (level 47) up to 6 km (level 30). The positive impact along the vertical of the assimilation of AOD in the CTM MOCAGE is due to the use of the vertical representation of the model to distribute the increment. Sič et al (2016) showed that the assumption of using the vertical representation of the model gives good assimilation results with the regular MOCAGE setup that distributes emissions over the 5 lowest vertical levels. [However, the performance of the assimilation may depend on the realism of the representation of aerosols along the vertical in the CTM.](#) The CRs simulations, in red, overestimate the PM<sub>10</sub> concentrations of the NR, in purple, due to the overestimation of desert dust concentrations in the CRs simulations. This overestimation is not present in the PM<sub>2.5</sub> concentrations because this is the fraction of aerosols where there are few desert dusts. For the first three simulations, the vertical PM<sub>10</sub> concentrations are well corrected by the assimilation, while for

Supprimé: Figure 13

Supprimé: s

Supprimé: s

Supprimé: great

Supprimé: Figure 14

Supprimé: Figure 12

Supprimé: while o

Supprimé: the simulation 4

Supprimé: Figure 15 and 16

simulation 4, the correction is less relevant for the levels near the surface. The assimilation tends to decrease the  $PM_{2.5}$  concentrations above the level 42 and to increase the concentrations under that level. Simulation 4 presents a decay of the surface concentrations of  $PM_{2.5}$ . The correction of concentrations is more pertinent for the  $PM_{10}$  concentrations than for the  $PM_{2.5}$  concentrations, which was expected.

The vertical distribution of aerosol concentrations between the CR4 simulations and the NR explains why the bias over the ocean tends to increase. At the lowest level, the concentration of  $PM_{10}$  is more important, since the CR4 emits only at the surface level, while the AOD is less important, since the aerosol loss by dry deposition increases. The positive increment is therefore added preferentially to the surface level, which increases the bias at surface.

To evaluate the capability of the FCI 444 nm channel observations to improve aerosol forecast in an air quality scenario, the ARs simulations have been compared to the NR using the synthetic AQeR stations as in Sect. 4. Tables 7 and 8 show the statistics of the comparison between the ARs and the NR for  $PM_{10}$  and  $PM_{2.5}$  concentrations. With regard of the comparison of the CRs against the NR in Tab. 5 and 6, the ARs are more consistent with the NR. The bias is reduced for both  $PM_{10}$  and  $PM_{2.5}$  concentrations. The RMSE and the FGE decrease while the Factor of 2 and the correlations increase for all ARs compared to their respective CRs.

The daily medians of  $PM_{10}$  and  $PM_{2.5}$  concentrations at all stations are represented over time in Fig. 14 and 15 for the four simulations. The assimilation reduces the gap between the simulations and the NR over the entire period. Around the secondary inorganic aerosol episode, 65<sup>th</sup> day of simulation, the improvements of  $PM_{10}$  and  $PM_{2.5}$  surface concentrations are significant for simulations 2, 3 and 4.

From an air quality monitoring perspective, the assimilation of the FCI synthetic AOD at 444 nm in MOCAGE improves strongly the surface  $PM_{10}$  concentrations in the 4 simulations over the European continent for the period January-April 2014.

To quantify the improvement of simulations through the assimilation of FCI synthetic observations during a severe pollution episode for (7<sup>th</sup>-15<sup>th</sup> March) over Europe, maps of relative concentrations of  $PM_{10}$  and FGE are respectively represented for the CRs comparison and for the ARs comparison in Fig. 16 and 17. The simulations CR2, CR3 and CR4 underestimate  $PM_{10}$  concentrations for 70 % over all Europe compared to the NR. The FGE presents high values going from 0.55 to 0.85. The assimilation of synthetic AOD improves meaningfully the surface concentrations of aerosols over the continent in the simulations, but the simulations still underestimate the  $PM_{10}$  concentrations by 30-20 %. Important changes in the FGE are noticeable, with values dropping from 0.55-0.85 down to 0.2-0.4 for all simulations. Over the other areas, the assimilation reduces significantly the relative bias and the FGE. Thus, the assimilation of synthetic observations improves significantly the representation of the surface  $PM_{10}$  concentrations of simulations during the pollution episode.

In summary, the use of synthetic observations at 444 nm of the future sensor FCI through assimilation improves significantly the aerosol fields of the simulations over the European domain from January to April 2014. These improvements are located

Supprimé: les

Supprimé: 9

Supprimé: 10

Supprimé: les 7

Supprimé: 8

Supprimé: Figure 17 and in Figure 18

Supprimé: 4

Supprimé: over a high spatial and temporal episode of

Supprimé: Figure 19 and in Figure 20

all over the domain with best results over the European continent and the Mediterranean area. The improvement of the vertical profile of aerosol concentrations is also noticeable, and it may be explained because different parts of the column can be transported by winds in different directions (Sič et al, 2016), although the AOD synthetic observations do not provide information along the vertical. The first two simulations give better results over the ocean than simulations 3 and 4, due to a closer representation of the vertical profile of the aerosol concentrations. This may show an overly optimistic aspect of the OSSE of the first two simulations. The simulations lead to sufficiently reliable results since the shapes of their vertical profile of aerosol concentrations are different from those of the NR. These differences are caused by the way emissions are injected in the atmosphere (higher for simulation 3 and lower for simulation 4). The simulations 3 and 4 present robust results over continent, despite the differences in the vertical representation of aerosol concentrations.

## 6 Discussion

Although the results have shown a general benefit of FCI/VIS04 future measurements for assimilation in the CTM MOCAGE, some limitations must be addressed. The AOD does not introduce information on the vertical distribution of PM, nor on the size distribution and type of aerosols. So, the performance of the assimilation will largely depend on the realism of the representation of aerosols in the CTM before assimilation. If, for instance, the model has a positive bias in AOD and a negative bias in surface PM10 compared to observations, then the assimilation could lead to detrimental results. So the AOD and PM biases should be assessed and corrected as far as possible, before assimilation, in order to avoid detrimental assimilation.

To identify the added value of assimilating FCI/VIS04 AOD, it is needed to compare the results with the assimilation of present-day observations, such as imagers on LEO satellites and in-situ surface PM observations. The assimilation of PM surface observations is indeed an efficient way to improve PM concentration fields at surface (Tombette et al, 2009), but the correction of the fields remains confined to the lowermost levels. While improving the PM surface fields, it has been shown that the assimilation of AOD also gives a better representation of aerosols along the vertical (Fig. 12 and 13) and of the AOD fields, which are important added value that the assimilation of PM surface observations only cannot achieve. Besides, the satellite coverage is much broader than the coverage of in-situ network and, for instance, aerosol fields over the seas can be corrected before they reach the coast.

In order to assess the added-value of a high repetitivity measurements of FCI compared to a LEO satellite, a complementary experiment, called AR3LEO, has been done. This experiment is based on the CR3 configuration of MOCAGE, but the synthetic observations kept are only the ones at 12UTC, instead of the hourly observations. By taking into account only one measurement per pixel per day, AR3LEO should thus simulate the assimilation of a LEO satellite. The results of AR3LEO are in Tab. 9 and Fig. 18. The density of observations assimilated is about 10 times lower than the density of FCI assimilated data. Most of the scores (except the PM2.5 correlation) of AR3LEO are between the CR3 and the AR3 scores, which shows

Supprimé: 6

Mis en forme : Normal

and quantifies the benefit of FCI compared to a LEO satellite. This is confirmed also on the time series of PM<sub>10</sub> surface concentrations show (Fig. 18): the AR3LEO simulation is closer to the CR3 simulation than to the AR3 simulation. During the pollution episodes from 7 to 14 March 2014 (Fig. 18, time series between day 60 and day 67, and maps), the amplitude of PM concentrations is underestimated more in AR3LEO than in AR3. The maps of bias and FGE show better scores in AR3 than in AR3LEO at the locations where pollution occurs.

The results have shown the potential benefit of assimilating AOD data from the future FCI/VIS04 in a chemistry-transport model for monitoring the PM concentrations at regional scale over Europe. The horizontal and temporal resolution of FCI (2 km horizontal grid every 10 minutes or even 2.5 minutes in Regional Rapid Scan) will however be much finer than the regional scales that have been considered in this study: (0.2° horizontal grid every hour). The large differences between the resolution of future FCI data and the data used in this OSSE have two important implications that deserve to be presented. Firstly, in order to get closer to the future data, one could consider generating synthetic observations at the full FCI resolution and assimilate them in a regional-scale assimilation system. The use of multiple observations using a “super-observation” approach, by spatial and temporal averaging, should reduce the instrumental errors and thus one may expect that the assimilation of real FCI data can lead to even better results than the OSSE presented here. Secondly, it is worth considering whether high-resolution FCI measurements could be assimilated in a high-resolution model for kilometre-scale monitoring of air quality. However, such work is presently limited by the present state of the art of numerical chemistry models and of their input emission data. The conclusions of some recent numerical experiments with kilometre-scale air quality models (Colette et al, 2014) are that such models are very expensive and that the emission inventories do not have a sufficient resolution. Still, the performance of such high resolution models are better than coarser resolution ones. As computing capacities keep increasing and kilometre-scale air quality models become affordable, it will be interesting to evaluate the benefit of assimilating high resolution FCI data in a kilometre-scale air quality model, even if the emission data is built with coarse assumptions. One might expect that the assimilation of FCI data could correct enough the model state to balance the deficiencies of the emission inventories. For such study, high temporal repetitivity may be also of high interest.

## 7 Conclusion

An OSSE method has been developed to quantify the added value of assimilating future MTG/FCI VIS04 AOD (444 nm) for regional-scale aerosol monitoring in Europe. The characteristic errors of the FCI have been computed from a sensitivity analysis and introduced in the computation of synthetic observations from the NR. An evaluation of the realistic state of the

Mis en forme : Anglais (États Unis), Indice

Mis en forme : Anglais (États Unis)

Supprimé: Conclu

Déplacé (insertion) [7]

Supprimé: The assimilation has been made using only one observation per model profile. T

Supprimé: . ¶

Supprimé: sion

Supprimé: in the chemistry and transport model MOCAGE



atmosphere of the NR has been done, as well as a comparison of CR simulations with the NR, in order to avoid the identical twin problem mentioned in Timmermans et al. (2009a). Furthermore, different control run simulations have been set up as in Claeys et al. (2011) to avoid this issue. The results of the OSSE should hence be representative of the results that the assimilation of real retrieved AODs from the FCI sensor will bring.

Although the use of a single synthetic observation per profile and the choice of an albedo error of 10% are pessimistic choices, the assimilation of synthetic AOD at 444 nm showed a positive impact, particularly for the European continental air pollution. The simulations with data assimilation reproduced spatial and temporal patterns of PM<sub>10</sub> concentrations at surface better than without assimilation all along the simulations and especially during the high pollution event of March. The improvement of analysed fields is also expected for other strong pollution event such as a volcanic ash plume. This capability of synthetic observations to improve the analysis of aerosols is present for the 4 set of simulations which show the capability of future data from the FCI sensor to bring an added value within the CTM MOCAGE aerosol forecasts, and in general, in atmospheric composition models. Moreover, the advantage of a GEO platform over a LEO satellite has been shown and assessed.

The results over ocean show an increase of PM concentration bias after assimilation in some places, particularly for AR4. An explanation is that AOD does not introduce information vertically and that the correction of aerosols in the vertical relies on the model vertical distribution. For a satisfactory assimilation of AOD, the AOD and PM biases of the model should be assessed and corrected as far as possible. Another perspective is to use multiple wavelengths, using the Ångström exponent, could avoid this problem by better distributing the increment of AOD between the different bins and hence the different species. Sič et al. (2016) also recommended the use of other types of observations, such as lidars, in the assimilation process to introduce information over the vertical.

The results presented here in this OSSE are encouraging for the use of future FCI AOD data within CTMs for the wavelength VIS04 centered at 444 nm. The use of other channels could bring complementary information, such as the NIR2.2 that is expected to be less sensitive to fine aerosols but more sensitive to large aerosols such as desert dusts and sea salt aerosols. Future work may also consider exploiting the high-resolution of FCI, following two possible lines: either for regional-scale assimilation by using a “super-observation” procedure, or for kilometre-scale air quality mapping and for assessing the quality of emission inventories. However, such extension is mostly depending on improvements in the numerical chemistry models, in the input emission data and in the optimization of assimilation algorithms.

**Déplacé vers le haut [7]:** The assimilation has been made using only one observation per model profile. The use of multiple observations using a “super-observation” approach, by spatial and temporal averaging, should reduce the instrumental errors and lead to even better results. ¶

**Supprimé:** Some of t

**Supprimé:** ed

**Supprimé:** breakdown of the concentrations due to the way assimilated information is split between the aerosol bins following the model concentrations on the vertical

**Supprimé:** The

**Supprimé:** of

**Supprimé:** channel

## Acknowledgements

We acknowledge that the MTG satellites are being developed under an European Space Agency contract to Thales Alenia Space. We thank both reviewers for their constructive and insightful comments.

## Appendix: Deriving AOD error variance from the Global Sensitivity Analysis of FCI/VIS04 reflectance

The general method is summarized in Figure A1. A sensitivity analysis has been performed for each OPAC aerosol types, using Monte-Carlo FCI simulations of about 200.000 draws in the prior distribution of the input parameters. The input distribution of AOD and of total ozone and water vapor columns are obtained from a MOCAGE simulation ran over the whole 2013 year. The distribution of ground albedo is deduced from the OPAC database. The profiles of the MOCAGE simulation are classified into OPAC (Hess et al., 1998) types by making correspondence between species as Ceamanos et al. (2014) and then by applying classification criteria similar to the OPAC types.

For every OPAC type, a global sensitivity analysis (GSA) has been performed between the input (AOD  $\tau$ , total column water vapour, ozone content), ground albedo  $\rho_{gr}$  and solar zenithal angle  $\theta_s$  distributions and the output (VIS04 reflectance) distributions of the FCI simulator. Under the assumption of independent inputs, the Sobol (1990, 1993) indices enable a ranking of inputs or couple of inputs with respect their variance-based importance in the total output variance. For VIS04, the variability of the solar zenithal angle, the ground albedo and the AOD are the three largest Sobol indices in that order and, together, they are at the origin of more than 98 % of the total variance of the output reflectance. Following Sobol (1996), the GSA can also be used to determine a truncated version of the Hoeffding (1948, ANOVA) functional decomposition, with key inputs, that approximates the analyzed reflectance. For all OPAC groups, the dependence of reflectance for VIS04 on the total ozone column and water vapor is negligible and is not taken into account in the reflectance approximation. As a consequence, the reflectance  $R$  can be approximated by the following equation:

$$R = f_1(\theta_s) + f_2(\rho_{gr}) + f_3(\tau) + \epsilon, \quad (2)$$

where  $f_1$ ,  $f_2$  and  $f_3$  are functions of the solar zenithal angle, the ground albedo and the AOD, respectively. The approximation error  $\epsilon$ , exhibits a root mean square (RMS) less than  $0.7 \text{ W m}^{-2} \text{ sr}^{-1} \mu\text{m}^{-1}$  (1.5 % of the mean radiance values of  $47.3 \text{ W m}^{-2} \text{ sr}^{-1} \mu\text{m}^{-1}$ ).

As a consequence of this sensitivity analysis, it is then possible to isolate the AOD  $\tau$  with respect the measured reflectance  $R$ , the other key inputs  $\theta_s$ ,  $\rho_{gr}$  and the approximation error  $\epsilon$ :

$$\tau = F(R, \theta_s, \rho_{gr}, \epsilon), \quad (3)$$

By sampling input distributions on this equation (Monte-Carlo method), the root mean square error (RMSE) of the AOD retrieval can be derived as a function of the reflectance  $R$ , the solar zenithal angle  $\theta_s$ , the ground albedo  $\rho_{gr}$  and of their uncertainty.  $R$  is associated with a measurement noise. No uncertainty is prescribed for the solar zenithal angle. For a given fixed value of relative error of ground albedo, a look-up-table is built, that provides the root mean square error (RMSE) of

Mis en forme : Retrait : Première  
ligne : 0 cm

Mis en forme ... [37]

Mis en forme ... [38]

Mis en forme ... [39]

Mis en forme ... [40]

Mis en forme ... [41]

Mis en forme ... [42]

Mis en forme ... [43]

Mis en forme ... [44]

Mis en forme ... [45]

Mis en forme ... [46]

Mis en forme ... [47]

Mis en forme ... [48]

Mis en forme ... [49]

the AOD retrieval as a function of the solar zenithal angle and of the ground albedo. Such a look-up-table of the RMSE of VIS04 AOD has been computed for every OPAC types and for different possible values of surface albedo errors.

## References

- 5 Alfaro, S. C., Gaudichet, A., Gomes, L., and Maillé, M.: Mineral aerosol production by wind erosion: aerosol particle sizes and binding energies, *Geophys. Res. Lett.*, **25**, 991–994, 1998.
- Aoun, Y.: Evaluation de la sensibilité de l'instrument FCI à bord du nouveau satellite Meteosat Troisième Génération imageur (MTG-I) aux variations de la quantité d'aérosols d'origine désertique dans l'atmosphère. Thèse de Doctorat PSL Research University, 2016.
- 10 Aoun, Y., Blanc, P., Wald, L., Mathieu, S., and Claeys, M.: The use of global sensitivity analysis for assessing capability of the MTG/FCI instrument to detect aerosols. In Proceedings of the 2015 EUMETSAT Meteorological Satellite Conference, Toulouse, France, 21-25 Sep 2015. [http://www.eumetsat.int/website/home/News/ConferencesandEvents/DAT\\_2305526.html](http://www.eumetsat.int/website/home/News/ConferencesandEvents/DAT_2305526.html) (session 3), Aoun.pdf, 2015.
- 15 Bäumer, D., Vogel, B., Versick, S., Rinke, R., Möhler, O., and Schnaiter, M.: Relationship of visibility, aerosol optical thickness and aerosol size distribution in an ageing air mass over South-West Germany, *Atmos. Environ.*, **42**, 989–998, 2008.
- Bechtold, P., Bazile, E., Guichard, F., Mascart, P., and Richard, E.: A mass-flux convection scheme for regional and global models, *Q. J. Roy. Meteor. Soc.*, **127**, 869–886, 2001.
- 20 Benedetti, A., Morcrette, J.-J., Boucher, O., Dethof, A., Engelen, R., Fisher, M., Flentje, H., Huneeus, N., Jones, L., Kaiser, J., et al.: Aerosol analysis and forecast in the European centre for medium-range weather forecasts integrated forecast system: 2. Data assimilation, *J. Geophys. Res. Atmos.*, **114**, 2009.
- Bernard, E., Moulin, C., Ramon, D., Jolivet, D., Riedi, J., and Nicolas, J.-M.: Description and validation of an AOT product over land at the 0.6 [mu] m channel of the SEVIRI sensor onboard MSG, *Atmos. Meas. Tech.*, **4**, 2543, 2011.
- 25 Brook, R. D., Franklin, B., Cascio, W., Hong, Y., Howard, G., Lipsett, M., Luepker, R., Mittleman, M., Samet, J., Smith, S. C., et al.: Air pollution and cardiovascular disease, *Circulation*, **109**, 2655–2671, 2004.
- Carrer, D., Roujean, J.-L., Hauteceur, O., and Elias, T.: Daily estimates of aerosol optical thickness over land surface based on a directional and temporal analysis of SEVIRI MSG visible observations, *J. Geophys. Res. - Atmos.*, **115**, 2010.
- Castro, L., Pio, C., Harrison, R. M., and Smith, D.: Carbonaceous aerosol in urban and rural European atmospheres: estimation of secondary organic carbon concentrations, *Atmos. Environ.*, **33**, 2771–2781, 1999.
- 30 Ceamanos, X., Carrer, D. and Roujean, J.L.: Improved retrieval of direct and diffuse downwelling surface shortwave flux in cloudless atmosphere using dynamic estimates of aerosol content and type: Application to the LSA-SAF project. *Atmos. Chem. Phys.*, **15**, 8209–8232, 2014.

Mis en forme : Retrait : Première ligne : 0 cm

Supprimé: sical

Supprimé: earch

Supprimé: ers,

Supprimé: held in

Supprimé: 6

Supprimé: pheric

Supprimé: ment

Supprimé: uarterly Journal of the Royal

Supprimé: ological

Supprimé: iety

Supprimé: urnal of

Supprimé: ical

Supprimé: earch:

Supprimé: pheres

Supprimé: pheric

Supprimé: urement

Supprimé: niques

Supprimé: Boucher, O.: Aérosols atmosphériques : Propriétés et impacts climatiques, Springer, Ingénierie Et Develop.durable, 2011.¶

Supprimé: Journal of Geophysical Research: Atmospheres

Supprimé: ¶

Supprimé: pheric

Supprimé: ment

Supprimé: pheric

Supprimé: istry and

Supprimé: ics

Claeys, M., Attié, J.-L., Peuch, V.-H., El Amraoui, L., Lahoz, W. A., Josse, B., Joly, M., Barré, J., Ricaud, P., Massart, S., et al.: A thermal infrared instrument onboard a geostationary platform for CO and O3 measurements in the lowermost troposphere: Observing System Simulation Experiments (OSSE), *Atmos. Meas. Tech.*, **4**, 1637, 2011.

Colette, A., B. Bessagnet, F. Meleux, E. Terrenoire, and L. Rouil.: *Frontiers in air quality modelling*, *Geosci. Model Dev.*, **7**, 203-210, 2014.

Curci, G., C. Hogrefe, R. Bianconi, U. Im, A. Balzani, R. Baro, D. Brunner, R. Forkel, L. Giordano, M. Hirtl: *Uncertainties of simulated optical properties induced by assumption on aerosol physical and chemical properties: an AQMEII-2 perspective*, *Atmos. Environ.*, **115**, 541-552, 2015.

Dufour, A., Amodei, M., Ancellet, G., and Peuch, V.-H.: Observed and modelled “chemical weather” during ESCOMPTE, *Atmos. Res.*, **74**, 161–189, 2005.

EEA: Air quality in Europe — 2014 report, <https://www.eea.europa.eu/publications/air-quality-in-europe-2014/>.

Edwards, D. P., A. F. Arellano Jr., M. N., and M. N. Deter, A satellite observation system simulation experiment for carbon monoxide in the lowermost atmosphere, *J. Geophys. Res.*, **114**, D14304, 2009.

Eskes, H., Huijnen, V., Arola, A., Benedictow, A., Blechschmidt, A., Botek, E., Boucher, O., Bouarar, I., Chabrillat, S., Cuevas, E., et al.: Validation of reactive gases and aerosols in the MACC global analysis and forecast system, *Geosci. Model. Dev.*, **8**, 3523, 2015.

Eumetsat: URD Eumetsat,  
[http://www.eumetsat.int/website/wcm/idc/idcplg?IdcService=GET\\_FILE&dDocName=pdf\\_mtg\\_eurd&RevisionSelectionMethod=LatestReleased&Rendition=Web](http://www.eumetsat.int/website/wcm/idc/idcplg?IdcService=GET_FILE&dDocName=pdf_mtg_eurd&RevisionSelectionMethod=LatestReleased&Rendition=Web), 2010.

Fountoukis, C. and Nenes, A.: ISORROPIA II: a computationally efficient thermodynamic equilibrium model for K+–Ca 2+–Mg 2+–NH4+–Na+–SO 4 2–NO 3–Cl–H 2 O aerosols, *Atmos. Chem. and Phys.*, **7**, 4639–4659, 2007.

Gerber, H. E.: Relative-humidity parameterization of the Navy Aerosol Model (NAM), Tech. rep., NAVAL RESEARCH LAB WASHINGTON DC, 1985.

Gong, S.: A parameterization of sea-salt aerosol source function for sub-and super-micron particles, *Global Biogeochem. Cy.*, **17**, 2003.

Granier, C., Bessagnet, B., Bond, T., D’Angiola, A., van Der Gon, H. D., Frost, G. J., Heil, A., Kaiser, J. W., Kinne, S., Klimont, Z., et al.: Evolution of anthropogenic and biomass burning emissions of air pollutants at global and regional scales during the 1980–2010 period, *Climatic Change*, **109**, 163, 2011.

Guffanti, M., Casadevall, T. J., and Budding, K. E.: Encounters of aircraft with volcanic ash clouds: a compilation of known incidents, 1953-2009, US Department of Interior, US Geological Survey, 2010.

Guth, J., Josse, B., Maréchal, V., Joly, M., and Hamer, P. D.: First implementation of secondary inorganic aerosols in the MOCAGE version R2. 15.0 chemistry transport model, *Geosci. Model. Dev.*, **9**, 137-160, 2016.

Hess, M., Koepke, P., and Schult, I.: Optical properties of aerosols and clouds: The software package OPAC, *B. Am. Meteorol. Soc.*, **79**, 831–844, 1998.

- Supprimé: pheric
- Supprimé: urement
- Supprimé: niques
- Mis en forme : Police :(Par défaut) +Corps (Times New Roman), Anglais (États Unis)
- Supprimé: Diehl, T., Heil, A., Chin, M., Pan, X., Streets, D., Schultz, M., and Kinne, S.: Anthropogenic, biomass burning, and volcanic emissions of black carbon, organic carbon, and SO 2 from 1980 to 2010 for hindcast model experiments, *Atmospheric Chemistry and Physics Discussions*, pp. 24 895–24 954, 2012.
- Mis en forme : Anglais (États Unis)
- Supprimé: pheric
- Supprimé: earch
- Supprimé: Eckermann, S.: Hybrid σ–p coordinate choices for a global model, *Monthly Weather Review*, **137**, 224–245, 2009.¶
- Mis en forme : Anglais (États Unis)
- Mis en forme : Anglais (États Unis)
- Supprimé: entific model development
- Supprimé: pheric
- Supprimé: istry
- Supprimé: ics
- Supprimé: b
- Supprimé: ical
- Supprimé: c
- Supprimé: ycles
- Supprimé: ulletin of the
- Supprimé: erican
- Supprimé: meteorological society

Hoefding, W.: A class of statistics with asymptotically normal distribution, *Ann. Math. Stat.*, pp. 293–325, 1948.

Holben, B. N., Eck, T., Slutsker, I., Tanre, D., Buis, J., Setzer, A., Vermote, E., Reagan, J., Kaufman, Y., Nakajima, T., et al.: AERONET—A federated instrument network and data archive for aerosol characterization, *Remote Sens. Environ.*, 66, 1–16, 1998.

5 Im, U., Bianconi, R., Solazzo, E., Kioutsioukis, I., Badia, A., Balzarini, A., Baró, R., Bellasio, R., Brunner, D., Chemel, C., et al.: Evaluation of operational on-line-coupled regional air quality models over Europe and North America in the context of AQMEII phase 2. Part I: Ozone, *Atmos. Environ.*, 115, 404–420, 2015.

Jaeglé, L., Quinn, P., Bates, T., Alexander, B., and Lin, J.-T.: Global distribution of sea salt aerosols: new constraints from in situ and remote sensing observations, *Atmos. Chem. Phys.*, 11, 3137–3157, 2011.

10 Joly, M. and Peuch, V.-H.: Objective classification of air quality monitoring sites over Europe, *Atmos. Environ.*, 47, 111–123, 2012.

Josse, B.: Représentation des processus de transport et de lessivage pour la modélisation de la composition chimique de l’atmosphère à l’échelle planétaire, Ph.D. thesis, Toulouse 3, 2004.

Kaiser, J., Heil, A., Andreae, M., Benedetti, A., Chubarova, N., Jones, L., Morcrette, J.-J., Razinger, M., Schultz, M., Suttie, M., et al.: Biomass burning emissions estimated with a global fire assimilation system based on observed fire radiative power, *Biogeosciences*, 9, 527, 2012.

15 Kirchstetter, T. W., Novakov, T., and Hobbs, P. V.: Evidence that the spectral dependence of light absorption by aerosols is affected by organic carbon, *J. Geophys. Res. - Atmos.*, 109, 2004.

Koepke, P., Hess, M., Schult, I., and Shettle, E.: Global aerosol data set, *MPI Meteorologie Hamburg Rep*, 243, 44, 1997.

20 Kuenen, J., Visschedijk, A., Jozwicka, M., and Denier Van Der Gon, H.: TNO-MACC\_II emission inventory; a multi-year (2003–2009) consistent high-resolution European emission inventory for air quality modelling, *Atmos. Chem. Phys.*, 14, 10 963–10 976, 2014.

[IPCC: Climate change 2007-the physical science basis: Working group I contribution to the fourth assessment report of the IPCC. vol. 4. Cambridge University Press, 2007.](#)

25 [Lahoz, W. A., V.-H. Peuch, J. Orphal, J.-L. Attié, K. Chance, X. Liu, D. Edwards, H. Elbern, J.-M. Flaud, M. Claeysman, L. El Amraoui, Monitoring air quality from space: the case of geostationary platform, Bull. Am. Meteorol. Soc., 93, 221-233, 2012.](#)

Lamarque, J.-F., Bond, T. C., Eyring, V., Granier, C., Heil, A., Klimont, Z., Lee, D., Liousse, C., Mieville, A., Owen, B., et al.: Historical (1850–2000) gridded anthropogenic and biomass burning emissions of reactive gases and aerosols: methodology and application, *Atmos. Chem. Phys.*, 10, 7017–7039, 2010.

30 Levy, R., Mattoo, S., Munchak, L., Remer, L., Sayer, A., Patadia, F., and Hsu, N.: The Collection 6 MODIS aerosol products over land and ocean, *Atmos. Meas. Tech.*, 6, 2989, 2013.

Louis, J.-F.: A parametric model of vertical eddy fluxes in the atmosphere, *Bound-Lay. Meteorol.*, 17, 187–202, 1979.

Supprimé: The annals of mathematical statistics

Supprimé: s

Supprimé: ing of

Supprimé: e

Supprimé: ment

Supprimé: pheric

Supprimé: ment

Supprimé: pheric

Supprimé: istry and

Supprimé: ics

Supprimé: pheric

Supprimé: ment

Supprimé: Journal of Geophysical Research: Atmospheres

Supprimé: pheric

Supprimé: istry and

Supprimé: ics

Supprimé: pheric

Supprimé: istry and

Supprimé: ics

Supprimé: pheric

Supprimé: urement

Supprimé: niques

Supprimé: ary

Supprimé: er

Supprimé: ogy,

Marécal, V., Peuch, V.-H., Andersson, C., Andersson, S., Arteta, J., Beekmann, M., Benedictow, A., Bergström, R., Bessagnet, B., Cansado, A., et al.: A regional air quality forecasting system over Europe: the MACC-II daily ensemble production, *Geosci. Model Dev.*, 8, 2777, 2015.

5 Martet, M., Peuch, V.-H., Laurent, B., Marticorena, B., and Bergametti, G.: Evaluation of long-range transport and deposition of desert dust with the CTM MOCAGE, *Tellus B*, 61, 449–463, 2009.

Marticorena, B. and Bergametti, G.: Modeling the atmospheric dust cycle: 1. Design of a soil-derived dust emission scheme, *Journal of Geophysical Research: Atmospheres*, 100, 16 415–16 430, 1995.

Massart, S., Clerbaux, C., Cariolle, D., Piacentini, A., Turquety, S., and Hadji-Lazaro, J.: First steps towards the assimilation of IASI ozone data into the MOCAGE-PALM system, *Atmos. Chem. Phys.*, 9, 5073–5091, 2009.

10 Masutani, M., T. W. Schlatter, R. M. Errico, A. Stoffelen, E. Andersson, W. Lahoz, J. S. Woollen, G. D. Emmitt, L. P. Riishøjgaard, and S. J. Lord: Observing system simulation experiments, *Data Assimilation*, 647-679, 2010.

Mayer, B. and Kylling, A.: The libRadtran software package for radiative transfer calculations-description and examples of use, *Atmospheric Chemistry and Physics*, 5, 1855–1877, 2005.

15 Mei, L., Xue, Y., Leeuw, G. d., Holzer-Popp, T., Guang, J., Li, Y., Yang, L., Xu, H., Xu, X., Li, C., et al.: Retrieval of aerosol optical depth over land based on a time series technique using MSG/SEVIRI data, *Atmos. Chem. Phys.*, 12, 9167–9185, 2012.

Petty, G. W.: A first course in atmospheric radiation, Sundog Pub, 2006.

Peuch, V.-H., and R. Engelen: Towards and operational GMES Atmosphere Monitoring Service. ECMWF Newsletter, 132, 20–25, 2012.

20 Prank, M., Sofiev, M., Tsyro, S., Hendriks, C., Semeena, V., Vazhappilly Francis, X., Butler, T., Denier van der Gon, H., Friedrich, R., Hendricks, J., et al.: Evaluation of the performance of four chemical transport models in predicting the aerosol chemical composition in Europe in 2005, *Atmos. Chem. Phys.*, 16, 6041–6070, 2016.

Rouil, L., Honore, C., Bessagnet, B., Malherbe, L., Meleux, F., Vautard, R., Beekmann, M., Flaud, J.-M., Dufour, A., Martin, D., et al.: PREV’AIR: an operational forecasting and mapping system for air quality in Europe, *B. Am. Meteorol.*

25 *Soc.*, 90, 73–83, 2009.

Seinfeld J.H. and Pandis S.N.: *Atmospheric Chemistry and Physics*, 1326 pp. John Wiley, Hoboken, NJ, 1998.

Sič, B., El Amraoui, L., Marécal, V., Josse, B., Arteta, J., Guth, J., and Hamer, P. D.: Modelling of primary aerosols in the chemical transport model MOCAGE: development and evaluation of aerosol physical parameterizations. *Geosci. Model Dev.*, 8, 381, 2015.

30 Sič, B., Amraoui, L. E., Piacentini, A., Marécal, V., Emili, E., Cariolle, D., Prather, M., and Attié, J.-L.: Aerosol data assimilation in the chemical transport model MOCAGE during the TRAQA/ChArMEx campaign: aerosol optical depth, *Atmos. Meas. Tech.*, 9, 5535–5554, 2016.

Sobol, I. M.: On sensitivity estimation for nonlinear mathematical models, *Matematicheskoe modelirovanie*, 2, 112–118, 1990.

- Supprimé: entific
- Supprimé: m
- Supprimé: d
- Supprimé: elopment
- Supprimé: ¶
- Supprimé: ¶ ... [50]
- Supprimé: pheric
- Supprimé: istry and
- Supprimé: ics
- Supprimé: ichiko,
- Supprimé: homas
- Supprimé: onald
- Supprimé: d
- Supprimé: rik
- Supprimé: illiam
- Supprimé: ohn
- Supprimé: avid
- Supprimé: ars
- Supprimé: eter
- Supprimé: tephen
- Supprimé: pheric
- Supprimé: istry and
- Supprimé: ics
- Supprimé: pheric
- Supprimé: istry and
- Supprimé: ics
- Supprimé: ulletin of the
- Supprimé: erican
- Supprimé: ogical
- Supprimé: iety
- Supprimé: . . .
- Supprimé: &
- Supprimé: entific
- Supprimé: elopment
- Supprimé: pheric
- Supprimé: urement
- Supprimé: niques
- Supprimé: ¶ ... [51]

Sobol, I. M.: Sensitivity estimates for nonlinear mathematical models, *Mathematical modelling and computational experiments*, 1, 407–414, 1993.

[Sobol, I. M.: On freezing of unessential variables, \*Moscow University Mathematics Bulletin\*, 51, 60–62, 1996.](#)

Stocker, T.: *Climate change 2013: the physical science basis: Working Group I contribution to the Fifth assessment report of the Intergovernmental Panel on Climate Change*, Cambridge University Press, 2014.

Timmermans, R. M., Schaap, M., Builtjes, P., Elbern, H., Siddans, R., Tjemkes, S., and Vautard, R.: An observing system simulation experiment (OSSE) for aerosol optical depth from satellites, *Journal of Atmospheric and Oceanic Technology*, 26, 2673–2682, 2009a.

[Timmermans, R. M., A. J. Segers, P. J. Builtjes, R. Vautard, R. Siddans, H. Elbern, S. A. Tjemkes, M. Schaap, The added value of a proposed satellite imager for ground level particulate matter analyses and forecasts, \*IEEE-JSTARS. J. Sel. Top. Appl. Earth Obs. Remote Sens.\*, 271-283, 2009b.](#)

Timmermans, R. M., Lahoz, W. A., Attié, J. L., Peuch, V. H., Curier, R. L., Edwards, D. P., ... & Builtjes, P. J. H.: Observing system simulation experiments for air quality, *Atmos. Environ.*, 115, 199-213, 2015.

[Tombette, M., V. Mallet, and B. Sportisse: PM10 data assimilation over Europe with the optimal interpolation method, \*Atmos. Phys. Chem.\*, 9, 57-70, 2009.](#)

van der Werf, G. R., Randerson, J. T., Giglio, L., Collatz, G. J., Kasibhatla, P. S., and Arellano Jr, A. F.: Interannual variability in global biomass burning emissions from 1997 to 2004, *Atmos. Chem. Phys.*, 6, 3423–3441, 2006.

Vidot, J. and Borbás, É.: Land surface VIS/NIR BRDF atlas for RTTOV-11: model and validation against SEVIRI land SAF albedo product, *Q. J. Roy. Meteorol. Soc.*, 140, 2186–2196, 2014.

Vieno, M., Heal, M., Twigg, M., MacKenzie, I., Braban, C., Lingard, J., Ritchie, S., Beck, R., Mórning, A., Ots, R., et al.: The UK particulate matter air pollution episode of March–April 2014: more than Saharan dust, *Environ. Res. Lett.*, 11, 044 004, 2016.

Williamson, D. L. and Rasch, P. J.: Two-dimensional semi-Lagrangian transport with shape-preserving interpolation, *Mon. Wea. Rev.*, 117, 102–129, 1989.

Wiscombe, W. J.: Mie scattering calculations: advances in technique and fast, vector-speed computer codes, *Atmospheric Analysis and Prediction Division, National Center for Atmospheric Research Boulder, CO*, 1979, revised 1996.

Wiscombe, W. J.: Improved Mie scattering algorithms, *Applied optics*, 19, 1505–1509, 1980.

Yumimoto, K., Nagao, T., Kikuchi, M., Sekiyama, T., Murakami, H., Tanaka, T., Ogi, A., Irie, H., Khatri, P., Okumura, H., et al.: Aerosol data assimilation using data from Himawari-8, a next-generation geostationary meteorological satellite, *Geophys. Res. Lett.*, 43, 5886–5894, 2016.

[Zoogman, P., D. J. Jacob, K. Chance, H. M. Worden, D. P. Edwards, L. Zhang, Improved monitoring of surface ozone by joint assimilation of geostationary satellite observations of ozone and CO, \*Atmos. Environ.\*, 84, 254-261, 2014.](#)

**Supprimé:** Solomon, S.: *Climate change 2007-the physical science basis: Working group I contribution to the fourth assessment report of the IPCC*, vol. 4, Cambridge University Press, 2007.¶  
Staniforth, A. and Côté, J.: Semi-Lagrangian integration schemes for atmospheric models—A review, *Monthly weather review*, 119, 2206–2223, 1991.¶

**Supprimé:** pheric

**Supprimé:** ment

**Supprimé:** pheric

**Supprimé:** istry and

**Supprimé:** ics

**Supprimé:** .

**Supprimé:** uarterly Journal of the

**Supprimé:** al

**Supprimé:** ogical

**Supprimé:** iety

**Supprimé:** mental

**Supprimé:** earch

**Supprimé:** ers

**Supprimé:** thly

**Supprimé:** ther

**Supprimé:** iew,

**Supprimé:** Yumimoto, K.: Impacts of geostationary satellite measurements on CO forecasting: An observing system simulation experiment with GEOSChem/LETKF data assimilation system, *Atmospheric environment*, 74, 123–133, 2013.¶

**Supprimé:** sical Research Letters

**Tables :**

|                          | Bias ( $\mu\text{g}/\text{m}^3$ ) | RMSE ( $\mu\text{g}/\text{m}^3$ ) | FGE   | FactOf2 | $R_p$ | $R_s$ |
|--------------------------|-----------------------------------|-----------------------------------|-------|---------|-------|-------|
| ▲ NR's $\text{PM}_{10}$  | - 6.23<br>(~ - 35.1 %)            | 16.2                              | 0.56  | 64.7 %  | 0.452 | 0.537 |
| ▲ NR's $\text{PM}_{2.5}$ | - 3.20<br>(~ - 24.7 %)            | 11.9                              | 0.543 | 67.5 %  | 0.535 | 0.602 |

**Table 1:** Bias, RMSE, FGE, Factor of 2, Pearson correlation ( $R_p$ ) and Spearman correlation ( $R_s$ ) of the NR simulation taking as reference the AQeR observations for hourly  $\text{PM}_{10}$  and  $\text{PM}_{2.5}$  concentrations from January to April 2014.

|      | Bias  | MNMB | RMSE | FGE   | $R_p$ |
|------|-------|------|------|-------|-------|
| ▲ NR | 0.043 | 0.39 | 0.09 | 0.531 | 0.56  |

**Table 2:** Bias, MNMB, RMSE, FGE and Pearson correlation ( $R_p$ ) between the NR simulation and AERONET station for daily 500 nm AOD from January to April 2014.

Mis en forme : Anglais (États Unis)

Mis en forme : Anglais (États Unis)

Supprimé: 1

Supprimé: (B)

Mis en forme : Anglais (États Unis)

Mis en forme : Anglais (États Unis)

Supprimé: 2

Supprimé: (B)

Mis en forme : Anglais (États Unis)

Supprimé: Species  ... [52]

Mis en forme : Anglais (États Unis)



| Aerosol types | Surface Concentration in $\mu\text{g}/\text{m}^3$ | Main species | Surface proportion over the total $\text{PM}_{10}$ |
|---------------|---------------------------------------------------|--------------|----------------------------------------------------|
| DO. & DC.     | -                                                 | DD           |                                                    |
| MC.           | -                                                 | SS           | $\text{SS} > 85\%$                                 |
| MPO.          | -                                                 | SS           | $\text{SS} < 85\%$                                 |
| MPC.          | -                                                 | SS           | $\text{SS} < 85\%$                                 |
| CC.           | 0 – 17                                            | IWS          |                                                    |
| CA.           | 17 – 34                                           | IWS          |                                                    |
| CP.           | 34 – 75                                           | IWS          |                                                    |
| U.            | > 75                                              | IWS          |                                                    |

Mis en forme : Anglais (États Unis)

**Table 3:** Conditions for classifying the MOCAGE NR into the OPAC types. The first condition is the surface concentrations, the second is the main specie at the surface between Desert Dust (DD), Sea Salts (SS) and IWS (Insoluble, Water soluble, and Soot) and the third is a condition of the species over all the aerosols concentration. A species is described as a main species if its concentrations is above each other concentrations, for example DD is a main species if  $[\text{DD}] > [\text{SS}]$  &  $[\text{DD}] > [\text{IWS}]$ .

Mis en forme : Anglais (États Unis)

Supprimé: 5

Supprimé: on

Supprimé: profiles to be sorted

Supprimé: in

Supprimé: before being used for assimilation

Mis en forme : Anglais (États Unis)

Supprimé: 6

|     | Forecasts | SOA | Repartition of emissions from level 1 (surface layer) up to the 5th level |
|-----|-----------|-----|---------------------------------------------------------------------------|
| NR  | ARPEGE    | Yes | 52%; 26%; 13%; 6%; 3%                                                     |
| CR1 | IFS       | Yes | 52%; 26%; 13%; 6%; 3%                                                     |
| CR2 | IFS       | No  | 52%; 26%; 13%; 6%; 3%                                                     |
| CR3 | IFS       | No  | 30%; 24%; 19%; 15%; 12%                                                   |
| CR4 | IFS       | No  | 100%; 0%; 0%; 0%; 0%                                                      |

**Table 4:** Table of differences between the NR simulation and the CRs simulations.

Mis en forme : Anglais (États Unis)

| Hourly PM10<br>CRs<br>« stations » vs<br>NR « stations » | Bias (µg/m3)   | RMSE (µg/m3) | FGE   | FactOf2 | R <sub>p</sub> | R <sub>s</sub> |
|----------------------------------------------------------|----------------|--------------|-------|---------|----------------|----------------|
| ▲ CR1                                                    | -1.3 (-8.2 %)  | 7.9          | 0.332 | 89.1 %  | 0.671          | 0.748          |
| ▲ CR2                                                    | -4.5 (-35.2 %) | 9.3          | 0.47  | 75.6 %  | 0.609          | 0.709          |
| ▲ CR3                                                    | -4.8 (-38.1 %) | 9.8          | 0.511 | 69.3 %  | 0.572          | 0.671          |
| ▲ CR4                                                    | -2.9 (-20.5%)  | 8.7          | 0.412 | 81.9 %  | 0.623          | 0.712          |

**Table 5:** Bias, RMSE, FGE, Factor of 2, Pearson correlation (R<sub>p</sub>) and Spearman correlation (R<sub>s</sub>) of the CRs simulation taking as reference the NR simulations for hourly PM<sub>10</sub> concentrations from January to April 2014. The comparison is made at the same station location as for AQeR stations.

| Hourly PM2.5<br>CRs<br>« stations » vs<br>NR « stations » | Bias (µg/m3)  | RMSE (µg/m3) | FGE   | FactOf2 | R <sub>p</sub> | R <sub>s</sub> |
|-----------------------------------------------------------|---------------|--------------|-------|---------|----------------|----------------|
| ▲ CR1                                                     | -0.8(-6.24%)  | 5.9          | 0.307 | 91.1 %  | 0.732          | 0.776          |
| ▲ CR2                                                     | -3.9 (-37.4%) | 7.1          | 0.452 | 78.4 %  | 0.69           | 0.731          |
| ▲ CR3                                                     | -4.4 (-42.6%) | 7.6          | 0.505 | 70.6 %  | 0.644          | 0.695          |
| ▲ CR4                                                     | -1.8 (-15.1%) | 6.6          | 0.374 | 85.5 %  | 0.665          | 0.73           |

**Table 6:** Bias, RMSE, FGE, Factor of 2, Pearson correlation (R<sub>p</sub>) and Spearman correlation (R<sub>s</sub>) of the CRs simulation taking as reference the NR simulations for hourly PM<sub>2.5</sub> concentrations from January to April 2014. The comparison is made at the same station location as for AQeR stations.

Mis en forme : Anglais (États Unis)

Mis en forme : Gauche, Taquets de tabulation : 1,12 cm, Centré + 2,16 cm, Gauche

Mis en forme : Anglais (États Unis)

Supprimé: 7

Mis en forme : Anglais (États Unis)

Mis en forme : Anglais (États Unis)

Supprimé: (B)

Mis en forme : Position :Horizontal : 1,49 cm, Par rapport à : Page, Vertical : 4,74 cm, Par rapport à : Paragraphe

Mis en forme : Anglais (États Unis)

Mis en forme : Position :Horizontal : 1,46 cm, Par rapport à : Page, Vertical : 4,83 cm, Par rapport à : Paragraphe

Supprimé: 8

Mis en forme : Anglais (États Unis)

Mis en forme : Anglais (États Unis)

Supprimé: (B)

| Hourly PM10<br>CRs<br>« stations » vs<br>NR « stations » | Bias (µg/m3)     | RMSE (µg/m3) | FGE   | FactOf2 | R <sub>p</sub> | R <sub>s</sub> |
|----------------------------------------------------------|------------------|--------------|-------|---------|----------------|----------------|
| AR1                                                      | -1.17 (-7.21 %)  | 7.16         | 0.296 | 92.2 %  | 0.739          | 0.791          |
| AR2                                                      | -2.91 (-21.3 %)  | 8.1          | 0.373 | 85.3 %  | 0.694          | 0.751          |
| AR3                                                      | -3.53 (-26.2 %)  | 8.67         | 0.417 | 80.4 %  | 0.67           | 0.726          |
| AR4                                                      | -0.756 (-5.31 %) | 8.03         | 0.339 | 88.2 %  | 0.691          | 0.759          |

**Table 7:** Bias, RMSE, FGE, Factor of 2, Pearson correlation and Spearman correlation of the ARs simulation taking as reference the NR simulations for hourly PM<sub>10</sub> concentrations from January to April 2014. The comparison is made at the same station location as for AQeR stations.

Mis en forme : Anglais (États Unis)

Supprimé: 9

| Hourly PM2.5<br>ARs<br>« stations » vs<br>NR « stations » | Bias (µg/m3)    | RMSE (µg/m3) | FGE   | FactOf2 | R <sub>p</sub> | R <sub>s</sub> |
|-----------------------------------------------------------|-----------------|--------------|-------|---------|----------------|----------------|
| AR1                                                       | -0.395 (-3.15%) | 5.61         | 0.284 | 92.7 %  | 0.755          | 0.806          |
| AR2                                                       | -2.28 (-20.5 %) | 6.31         | 0.364 | 86.6 %  | 0.703          | 0.766          |
| AR3                                                       | -2.94 (-27.1 %) | 6.86         | 0.416 | 80.9 %  | 0.669          | 0.732          |
| AR4                                                       | 0.109 (0.9 %)   | 6.56         | 0.328 | 89.4 %  | 0.699          | 0.765          |

**Table 8:** Bias, RMSE, FGE, Factor of 2, Pearson correlation and Spearman correlation of the ARs simulation taking as reference the NR simulations for hourly PM<sub>2.5</sub> concentrations from January to April 2014. The comparison is made at the same station location as for AQeR stations.

Mis en forme : Anglais (États Unis)

Mis en forme : Position :Horizontal : 1,4 cm, Par rapport à : Page, Vertical : 5,24 cm, Par rapport à : Paragraphe

Supprimé:

Supprimé: 10

Mis en forme : Anglais (États Unis)

5

| Hourly<br>AR3LEO<br>« stations » vs<br>NR « stations » | Bias (µg/m3)    | RMSE<br>(µg/m3) | FGE   | FactOf2 | R <sub>p</sub> | R <sub>s</sub> |
|--------------------------------------------------------|-----------------|-----------------|-------|---------|----------------|----------------|
| PM10                                                   | -4.47 (-35.1 %) | 9.11            | 0.462 | 75.6 %  | 0.656          | 0.717          |
| PM2.5                                                  | -3.89 (-37 %)   | 7.14            | 0.457 | 76.5 %  | 0.681          | 0.731          |

Table 9: Bias, RMSE, FGE, Factor of 2, Pearson correlation and Spearman correlation of the AR3LEO simulation taking as reference the NR simulations for hourly PM10 and PM<sub>2.5</sub> concentrations from January to April 2014. The comparison is made at the same station location as for AQeR stations.

Mis en forme : Anglais (États Unis)

|

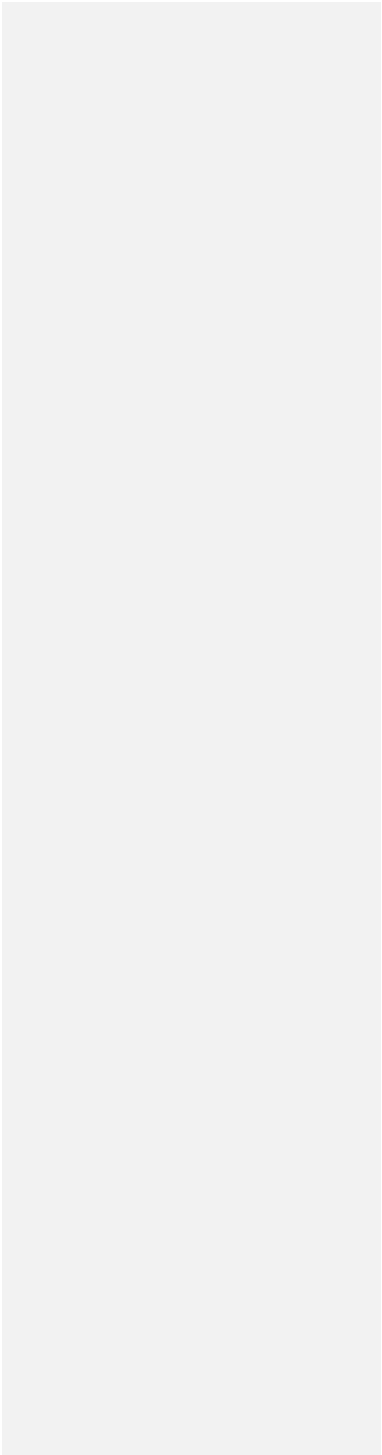





|                                  |                       |                            |
|----------------------------------|-----------------------|----------------------------|
| <b>Page 6 : [2] Mis en forme</b> | <b>Descheemaecker</b> | <b>02/01/2019 11:59:00</b> |
| Anglais (États Unis)             |                       |                            |
| <b>Page 6 : [2] Mis en forme</b> | <b>Descheemaecker</b> | <b>02/01/2019 11:59:00</b> |
| Anglais (États Unis)             |                       |                            |
| <b>Page 6 : [2] Mis en forme</b> | <b>Descheemaecker</b> | <b>02/01/2019 11:59:00</b> |
| Anglais (États Unis)             |                       |                            |
| <b>Page 6 : [2] Mis en forme</b> | <b>Descheemaecker</b> | <b>02/01/2019 11:59:00</b> |
| Anglais (États Unis)             |                       |                            |
| <b>Page 6 : [3] Supprimé</b>     | <b>Descheemaecker</b> | <b>10/12/2018 08:40:00</b> |
| is computation is based on       |                       |                            |
| <b>Page 6 : [3] Supprimé</b>     | <b>Descheemaecker</b> | <b>10/12/2018 08:40:00</b> |
| is computation is based on       |                       |                            |
| <b>Page 6 : [3] Supprimé</b>     | <b>Descheemaecker</b> | <b>10/12/2018 08:40:00</b> |
| is computation is based on       |                       |                            |
| <b>Page 6 : [3] Supprimé</b>     | <b>Descheemaecker</b> | <b>10/12/2018 08:40:00</b> |
| is computation is based on       |                       |                            |
| <b>Page 6 : [3] Supprimé</b>     | <b>Descheemaecker</b> | <b>10/12/2018 08:40:00</b> |
| is computation is based on       |                       |                            |
| <b>Page 7 : [4] Supprimé</b>     | <b>Descheemaecker</b> | <b>02/01/2019 10:12:00</b> |
| ; Diehl et al., 2012             |                       |                            |
| <b>Page 7 : [4] Supprimé</b>     | <b>Descheemaecker</b> | <b>02/01/2019 10:12:00</b> |
| ; Diehl et al., 2012             |                       |                            |
| <b>Page 7 : [5] Supprimé</b>     | <b>Descheemaecker</b> | <b>03/12/2018 09:44:00</b> |
| several                          |                       |                            |
| <b>Page 7 : [5] Supprimé</b>     | <b>Descheemaecker</b> | <b>03/12/2018 09:44:00</b> |
| several                          |                       |                            |
| <b>Page 7 : [5] Supprimé</b>     | <b>Descheemaecker</b> | <b>03/12/2018 09:44:00</b> |
| several                          |                       |                            |
| <b>Page 7 : [5] Supprimé</b>     | <b>Descheemaecker</b> | <b>03/12/2018 09:44:00</b> |
| several                          |                       |                            |
| <b>Page 7 : [5] Supprimé</b>     | <b>Descheemaecker</b> | <b>03/12/2018 09:44:00</b> |
| several                          |                       |                            |
| <b>Page 7 : [6] Mis en forme</b> | <b>Descheemaecker</b> | <b>02/01/2019 11:59:00</b> |
| Anglais (États Unis)             |                       |                            |
| <b>Page 7 : [6] Mis en forme</b> | <b>Descheemaecker</b> | <b>02/01/2019 11:59:00</b> |
| Anglais (États Unis)             |                       |                            |



**Page 7 : [6] Mis en forme** Descheemaecker 02/01/2019 11:59:00  
Anglais (États Unis)

**Page 7 : [6] Mis en forme** Descheemaecker 02/01/2019 11:59:00  
Anglais (États Unis)

**Page 7 : [6] Mis en forme** Descheemaecker 02/01/2019 11:59:00  
Anglais (États Unis)

**Page 7 : [6] Mis en forme** Descheemaecker 02/01/2019 11:59:00  
Anglais (États Unis)

**Page 7 : [6] Mis en forme** Descheemaecker 02/01/2019 11:59:00  
Anglais (États Unis)

**Page 7 : [6] Mis en forme** Descheemaecker 02/01/2019 11:59:00  
Anglais (États Unis)

**Page 7 : [6] Mis en forme** Descheemaecker 02/01/2019 11:59:00  
Anglais (États Unis)

**Page 7 : [6] Mis en forme** Descheemaecker 02/01/2019 11:59:00  
Anglais (États Unis)

**Page 7 : [6] Mis en forme** Descheemaecker 02/01/2019 11:59:00  
Anglais (États Unis)

**Page 7 : [6] Mis en forme** Descheemaecker 02/01/2019 11:59:00  
Anglais (États Unis)

**Page 7 : [6] Mis en forme** Descheemaecker 02/01/2019 11:59:00  
Anglais (États Unis)

**Page 7 : [6] Mis en forme** Descheemaecker 02/01/2019 11:59:00  
Anglais (États Unis)

**Page 7 : [6] Mis en forme** Descheemaecker 02/01/2019 11:59:00  
Anglais (États Unis)

**Page 7 : [6] Mis en forme** Descheemaecker 02/01/2019 11:59:00  
Anglais (États Unis)

**Page 7 : [6] Mis en forme** Descheemaecker 02/01/2019 11:59:00  
Anglais (États Unis)

**Page 7 : [6] Mis en forme** Descheemaecker 02/01/2019 11:59:00  
Anglais (États Unis)

**Page 7 : [6] Mis en forme** Descheemaecker 02/01/2019 11:59:00  
Anglais (États Unis)

**Page 7 : [6] Mis en forme** Descheemaecker 02/01/2019 11:59:00  
Anglais (États Unis)



|                                  |                       |                            |
|----------------------------------|-----------------------|----------------------------|
| <b>Page 7 : [8] Supprimé</b>     | <b>Descheemaecker</b> | <b>03/12/2018 09:44:00</b> |
| R                                |                       |                            |
| <b>Page 7 : [8] Supprimé</b>     | <b>Descheemaecker</b> | <b>03/12/2018 09:44:00</b> |
| R                                |                       |                            |
| <b>Page 7 : [8] Supprimé</b>     | <b>Descheemaecker</b> | <b>03/12/2018 09:44:00</b> |
| R                                |                       |                            |
| <b>Page 7 : [8] Supprimé</b>     | <b>Descheemaecker</b> | <b>03/12/2018 09:44:00</b> |
| R                                |                       |                            |
| <b>Page 7 : [8] Supprimé</b>     | <b>Descheemaecker</b> | <b>03/12/2018 09:44:00</b> |
| R                                |                       |                            |
| <b>Page 7 : [9] Mis en forme</b> | <b>Descheemaecker</b> | <b>02/01/2019 11:59:00</b> |
| Anglais (États Unis)             |                       |                            |
| <b>Page 7 : [9] Mis en forme</b> | <b>Descheemaecker</b> | <b>02/01/2019 11:59:00</b> |
| Anglais (États Unis)             |                       |                            |
| <b>Page 7 : [9] Mis en forme</b> | <b>Descheemaecker</b> | <b>02/01/2019 11:59:00</b> |
| Anglais (États Unis)             |                       |                            |
| <b>Page 7 : [9] Mis en forme</b> | <b>Descheemaecker</b> | <b>02/01/2019 11:59:00</b> |
| Anglais (États Unis)             |                       |                            |
| <b>Page 7 : [9] Mis en forme</b> | <b>Descheemaecker</b> | <b>02/01/2019 11:59:00</b> |
| Anglais (États Unis)             |                       |                            |
| <b>Page 7 : [9] Mis en forme</b> | <b>Descheemaecker</b> | <b>02/01/2019 11:59:00</b> |
| Anglais (États Unis)             |                       |                            |
| <b>Page 7 : [9] Mis en forme</b> | <b>Descheemaecker</b> | <b>02/01/2019 11:59:00</b> |
| Anglais (États Unis)             |                       |                            |
| <b>Page 7 : [9] Mis en forme</b> | <b>Descheemaecker</b> | <b>02/01/2019 11:59:00</b> |
| Anglais (États Unis)             |                       |                            |
| <b>Page 7 : [9] Mis en forme</b> | <b>Descheemaecker</b> | <b>02/01/2019 11:59:00</b> |
| Anglais (États Unis)             |                       |                            |
| <b>Page 7 : [9] Mis en forme</b> | <b>Descheemaecker</b> | <b>02/01/2019 11:59:00</b> |
| Anglais (États Unis)             |                       |                            |
| <b>Page 7 : [9] Mis en forme</b> | <b>Descheemaecker</b> | <b>02/01/2019 11:59:00</b> |
| Anglais (États Unis)             |                       |                            |
| <b>Page 7 : [10] Supprimé</b>    | <b>Descheemaecker</b> | <b>03/12/2018 09:44:00</b> |
| the F                            |                       |                            |



|                               |                       |                            |
|-------------------------------|-----------------------|----------------------------|
| <b>Page 7 : [12] Supprimé</b> | <b>Descheemaecker</b> | <b>03/12/2018 09:45:00</b> |
|-------------------------------|-----------------------|----------------------------|

The

|                               |                       |                            |
|-------------------------------|-----------------------|----------------------------|
| <b>Page 7 : [12] Supprimé</b> | <b>Descheemaecker</b> | <b>03/12/2018 09:45:00</b> |
|-------------------------------|-----------------------|----------------------------|

The

|                                   |                       |                            |
|-----------------------------------|-----------------------|----------------------------|
| <b>Page 7 : [13] Mis en forme</b> | <b>Descheemaecker</b> | <b>02/01/2019 11:59:00</b> |
|-----------------------------------|-----------------------|----------------------------|

Anglais (États Unis)

|                                   |                       |                            |
|-----------------------------------|-----------------------|----------------------------|
| <b>Page 7 : [13] Mis en forme</b> | <b>Descheemaecker</b> | <b>02/01/2019 11:59:00</b> |
|-----------------------------------|-----------------------|----------------------------|

Anglais (États Unis)

|                                   |                       |                            |
|-----------------------------------|-----------------------|----------------------------|
| <b>Page 7 : [13] Mis en forme</b> | <b>Descheemaecker</b> | <b>02/01/2019 11:59:00</b> |
|-----------------------------------|-----------------------|----------------------------|

Anglais (États Unis)

|                                   |                       |                            |
|-----------------------------------|-----------------------|----------------------------|
| <b>Page 7 : [13] Mis en forme</b> | <b>Descheemaecker</b> | <b>02/01/2019 11:59:00</b> |
|-----------------------------------|-----------------------|----------------------------|

Anglais (États Unis)

|                                   |                       |                            |
|-----------------------------------|-----------------------|----------------------------|
| <b>Page 7 : [13] Mis en forme</b> | <b>Descheemaecker</b> | <b>02/01/2019 11:59:00</b> |
|-----------------------------------|-----------------------|----------------------------|

Anglais (États Unis)

|                                   |                       |                            |
|-----------------------------------|-----------------------|----------------------------|
| <b>Page 7 : [13] Mis en forme</b> | <b>Descheemaecker</b> | <b>02/01/2019 11:59:00</b> |
|-----------------------------------|-----------------------|----------------------------|

Anglais (États Unis)

|                                   |                       |                            |
|-----------------------------------|-----------------------|----------------------------|
| <b>Page 7 : [13] Mis en forme</b> | <b>Descheemaecker</b> | <b>02/01/2019 11:59:00</b> |
|-----------------------------------|-----------------------|----------------------------|

Anglais (États Unis)

|                                   |                       |                            |
|-----------------------------------|-----------------------|----------------------------|
| <b>Page 7 : [13] Mis en forme</b> | <b>Descheemaecker</b> | <b>02/01/2019 11:59:00</b> |
|-----------------------------------|-----------------------|----------------------------|

Anglais (États Unis)

|                                   |                       |                            |
|-----------------------------------|-----------------------|----------------------------|
| <b>Page 7 : [13] Mis en forme</b> | <b>Descheemaecker</b> | <b>02/01/2019 11:59:00</b> |
|-----------------------------------|-----------------------|----------------------------|

Anglais (États Unis)

|                                   |                       |                            |
|-----------------------------------|-----------------------|----------------------------|
| <b>Page 7 : [13] Mis en forme</b> | <b>Descheemaecker</b> | <b>02/01/2019 11:59:00</b> |
|-----------------------------------|-----------------------|----------------------------|

Anglais (États Unis)

|                                   |                       |                            |
|-----------------------------------|-----------------------|----------------------------|
| <b>Page 7 : [13] Mis en forme</b> | <b>Descheemaecker</b> | <b>02/01/2019 11:59:00</b> |
|-----------------------------------|-----------------------|----------------------------|

Anglais (États Unis)

|                                   |                       |                            |
|-----------------------------------|-----------------------|----------------------------|
| <b>Page 7 : [13] Mis en forme</b> | <b>Descheemaecker</b> | <b>02/01/2019 11:59:00</b> |
|-----------------------------------|-----------------------|----------------------------|

Anglais (États Unis)

|                                   |                       |                            |
|-----------------------------------|-----------------------|----------------------------|
| <b>Page 7 : [13] Mis en forme</b> | <b>Descheemaecker</b> | <b>02/01/2019 11:59:00</b> |
|-----------------------------------|-----------------------|----------------------------|

Anglais (États Unis)

|                                   |                       |                            |
|-----------------------------------|-----------------------|----------------------------|
| <b>Page 7 : [13] Mis en forme</b> | <b>Descheemaecker</b> | <b>02/01/2019 11:59:00</b> |
|-----------------------------------|-----------------------|----------------------------|

Anglais (États Unis)

|                                   |                       |                            |
|-----------------------------------|-----------------------|----------------------------|
| <b>Page 7 : [13] Mis en forme</b> | <b>Descheemaecker</b> | <b>02/01/2019 11:59:00</b> |
|-----------------------------------|-----------------------|----------------------------|

Anglais (États Unis)









**Page 7 : [15] Mis en forme** Descheemaecker 02/01/2019 11:59:00  
Anglais (États Unis)

**Page 7 : [15] Mis en forme** Descheemaecker 02/01/2019 11:59:00  
Anglais (États Unis)

**Page 7 : [15] Mis en forme** Descheemaecker 02/01/2019 11:59:00  
Anglais (États Unis)

**Page 7 : [15] Mis en forme** Descheemaecker 02/01/2019 11:59:00  
Anglais (États Unis)

**Page 7 : [15] Mis en forme** Descheemaecker 02/01/2019 11:59:00  
Anglais (États Unis)

**Page 7 : [15] Mis en forme** Descheemaecker 02/01/2019 11:59:00  
Anglais (États Unis)

**Page 7 : [15] Mis en forme** Descheemaecker 02/01/2019 11:59:00  
Anglais (États Unis)

**Page 7 : [15] Mis en forme** Descheemaecker 02/01/2019 11:59:00  
Anglais (États Unis)

**Page 7 : [15] Mis en forme** Descheemaecker 02/01/2019 11:59:00  
Anglais (États Unis)

**Page 7 : [15] Mis en forme** Descheemaecker 02/01/2019 11:59:00  
Anglais (États Unis)

**Page 7 : [15] Mis en forme** Descheemaecker 02/01/2019 11:59:00  
Anglais (États Unis)

**Page 7 : [15] Mis en forme** Descheemaecker 02/01/2019 11:59:00  
Anglais (États Unis)

**Page 7 : [15] Mis en forme** Descheemaecker 02/01/2019 11:59:00  
Anglais (États Unis)

**Page 7 : [15] Mis en forme** Descheemaecker 02/01/2019 11:59:00  
Anglais (États Unis)

**Page 7 : [15] Mis en forme** Descheemaecker 02/01/2019 11:59:00  
Anglais (États Unis)

**Page 7 : [15] Mis en forme** Descheemaecker 02/01/2019 11:59:00  
Anglais (États Unis)

**Page 7 : [15] Mis en forme** Descheemaecker 02/01/2019 11:59:00  
Anglais (États Unis)

**Page 7 : [15] Mis en forme** Descheemaecker 02/01/2019 11:59:00  
Anglais (États Unis)

**Page 7 : [15] Mis en forme** **Descheemaecker** **02/01/2019 11:59:00**  
Anglais (États Unis)

**Page 7 : [15] Mis en forme** **Descheemaecker** **02/01/2019 11:59:00**  
Anglais (États Unis)

**Page 7 : [15] Mis en forme** **Descheemaecker** **02/01/2019 11:59:00**  
Anglais (États Unis)

**Page 7 : [16] Supprimé** **Descheemaecker** **05/12/2018 09:52:00**  
Stations, classified as 1 to 5, have been selected following Joly and Peuch (2012). This selection keeps stations that are representative of background air pollution, which is the range of scale that the model and the satellite may represent.

**Page 9 : [17] Supprimé** **Descheemaecker** **03/12/2018 09:37:00**  
S

**Page 9 : [17] Supprimé** **Descheemaecker** **03/12/2018 09:37:00**  
S

**Page 9 : [18] Supprimé** **Descheemaecker** **31/10/2018 09:06:00**  
from the 3D fields of the NR variables: primary organic and black carbon concentrations, desert dust concentrations, sea salt concentrations, secondary inorganic aerosol concentrations (ammonium, nitrate and sulfate), relative humidity, temperature and pressure. From these fields, AODs are calculated for the FCI VIS04 channel with the same computation module for aerosol optical properties as the observation operator. An AOD error is introduced using characterize errors of the FCI. To characterize the error in the channel VIS04, the simulator developed by Aoun (2016, Aoun et al., 2015), based on the Radiative Transfer Model (RTM) libRadtran (Mayer and Killings, 2005), has been used.

**Page 9 : [18] Supprimé** **Descheemaecker** **31/10/2018 09:06:00**  
from the 3D fields of the NR variables: primary organic and black carbon concentrations, desert dust concentrations, sea salt concentrations, secondary inorganic aerosol concentrations (ammonium, nitrate and sulfate), relative humidity, temperature and pressure. From these fields, AODs are calculated for the FCI VIS04 channel with the same computation module for aerosol optical properties as the observation operator. An AOD error is introduced using characterize errors of the FCI. To characterize the error in the channel VIS04, the simulator developed by Aoun (2016, Aoun et al., 2015), based on the Radiative Transfer Model (RTM) libRadtran (Mayer and Killings, 2005), has been used.

**Page 9 : [18] Supprimé** **Descheemaecker** **31/10/2018 09:06:00**  
from the 3D fields of the NR variables: primary organic and black carbon concentrations, desert dust concentrations, sea salt concentrations, secondary inorganic aerosol concentrations (ammonium, nitrate and sulfate), relative humidity, temperature and pressure. From these fields, AODs are calculated for the FCI VIS04 channel with the same computation module for aerosol optical properties as the observation operator. An AOD error is introduced using characterize errors of the FCI. To characterize the error in the channel VIS04, the

simulator developed by Aoun (2016, Aoun et al., 2015), based on the Radiative Transfer Model (RTM) libRadtran (Mayer and Killings, 2005), has been used.

**Page 9 : [18] Supprimé** **Descheemaecker** **31/10/2018 09:06:00**

from the 3D fields of the NR variables: primary organic and black carbon concentrations, desert dust concentrations, sea salt concentrations, secondary inorganic aerosol concentrations (ammonium, nitrate and sulfate), relative humidity, temperature and pressure. From these fields, AODs are calculated for the FCI VIS04 channel with the same computation module for aerosol optical properties as the observation operator. An AOD error is introduced using characterize errors of the FCI. To characterize the error in the channel VIS04, the simulator developed by Aoun (2016, Aoun et al., 2015), based on the Radiative Transfer Model (RTM) libRadtran (Mayer and Killings, 2005), has been used.

**Page 9 : [18] Supprimé** **Descheemaecker** **31/10/2018 09:06:00**

from the 3D fields of the NR variables: primary organic and black carbon concentrations, desert dust concentrations, sea salt concentrations, secondary inorganic aerosol concentrations (ammonium, nitrate and sulfate), relative humidity, temperature and pressure. From these fields, AODs are calculated for the FCI VIS04 channel with the same computation module for aerosol optical properties as the observation operator. An AOD error is introduced using characterize errors of the FCI. To characterize the error in the channel VIS04, the simulator developed by Aoun (2016, Aoun et al., 2015), based on the Radiative Transfer Model (RTM) libRadtran (Mayer and Killings, 2005), has been used.

**Page 9 : [18] Supprimé** **Descheemaecker** **31/10/2018 09:06:00**

from the 3D fields of the NR variables: primary organic and black carbon concentrations, desert dust concentrations, sea salt concentrations, secondary inorganic aerosol concentrations (ammonium, nitrate and sulfate), relative humidity, temperature and pressure. From these fields, AODs are calculated for the FCI VIS04 channel with the same computation module for aerosol optical properties as the observation operator. An AOD error is introduced using characterize errors of the FCI. To characterize the error in the channel VIS04, the simulator developed by Aoun (2016, Aoun et al., 2015), based on the Radiative Transfer Model (RTM) libRadtran (Mayer and Killings, 2005), has been used.

**Page 9 : [19] Supprimé** **Descheemaecker** **02/01/2019 14:01:00**

u

**Page 9 : [19] Supprimé** **Descheemaecker** **02/01/2019 14:01:00**

u

**Page 9 : [20] Mis en forme** **Descheemaecker** **02/01/2019 11:59:00**

Anglais (États Unis)

**Page 9 : [20] Mis en forme** **Descheemaecker** **02/01/2019 11:59:00**

Anglais (États Unis)

**Page 9 : [21] Mis en forme** **Descheemaecker** **02/01/2019 11:59:00**

Anglais (États Unis)

**Page 9 : [21] Mis en forme** **Descheemaecker** **02/01/2019 11:59:00**

Anglais (États Unis)

**Page 9 : [22] Supprimé** **Descheemaecker** **31/10/2018 09:52:00**

It

**Page 9 : [22] Supprimé** **Descheemaecker** **31/10/2018 09:52:00**

It

**Page 9 : [22] Supprimé** **Descheemaecker** **31/10/2018 09:52:00**

It

**Page 9 : [23] Déplacé vers la page 9 (Déplacement n°1)** **Descheemaecker**  
**31/10/2018 09:49:00**

Since the FCI response may depend on the aerosol types, independent model errors per OPAC (Optical Properties of Aerosols and Clouds, Hess et al., 1998) types have been computed: dust, maritime clean, maritime polluted, continental clean, continental average, continental polluted, and urban.

**Page 9 : [24] Supprimé** **Descheemaecker** **05/11/2018 15:13:00**

Since the FCI response may depend on the aerosol types, independent model errors per OPAC (Optical Properties of Aerosols and Clouds, Hess et al., 1998) types have been computed: dust, maritime clean, maritime polluted, continental clean, continental average, continental polluted, and urban. For each OPAC type, the distribution of the atmospheric conditions has been built from a MOCAGE simulation ran over the whole 2013 year. Aerosol species described in OPAC are mineral dusts (nuc. mode: MINM; acc. mode: MIAM; coa. mode: MICM), sea salts (acc. mode: SSAM; coa. mode: SSCM), soluble aerosols (water soluble: WASO), insoluble aerosols (INSO) and soot aerosols (SOOT). A correspondence of aerosol species has been made between MOCAGE and OPAC (Table 3) as in Ceamanos et al. (2014). Then some criteria are applied on the vertical distributions of aerosol species and their concentrations (Table 4) to classify the MOCAGE profiles into the different OPAC types. A large number of profiles have not been classified because they did not fit into the criteria

**Page 9 : [25] Mis en forme** **Descheemaecker** **05/11/2018 15:13:00**

Retrait : Gauche : 0,63 cm

**Page 9 : [26] Supprimé** **Descheemaecker** **31/10/2018 10:18:00**

The aim of this step is to produce the most accurate and realistic histograms of AOD used for the Monte-Carlo based simulations of FCI radiances.

**Page 9 : [26] Supprimé** **Descheemaecker** **31/10/2018 10:18:00**

The aim of this step is to produce the most accurate and realistic histograms of AOD used for the Monte-Carlo based simulations of FCI radiances.

**Page 9 : [27] Supprimé** **Descheemaecker** **05/11/2018 13:43:00**

For each spectral band and OPAC aerosol types, and under the hypothesis of statistical independence of each variable, the simulator has been used to compute radiance for a Monte-Carlo-based random draws of 200.000 sets of inputs, following histograms. The Fig. 4 (Step 1) presents an example of histograms of the inputs and the

corresponding histogram of the resulting radiances for the spectral band VIS04 (415-475 nm), for the aerosol type “continental clean”. A measurement noise (white Gaussian noise) has been added to the simulated radiance, following a specific model of signal-to-noise ratio (i.e. standard deviation of noise over the resulting radiance). Then the radiances were converted in reflectance by dividing it by the corresponding TOA radiances including the cosine of the solar zenithal angle.

A global sensitivity analysis (GSA) has been performed using the Sobol indices under the assumption of independent inputs, the Sobol indices enable a ranking of inputs or couple of inputs with respect their variance-based importance in the total output variance. The Fig. 5 presents the ranking of the Sobol indices of orders 1 and 2 for the output reflectance of VIS04 for the continental clean aerosol type. The blue bars represent the Sobol indices in descending order of single or couple of inputs. The red line represents the cumulated sum of the sorted Sobol indices. The variability of the solar zenithal angle, the ground albedo and the AOD are the three largest Sobol indices in that order and, together, they are at the origin of more than 98 % of the total variance of the output reflectance. (Fig. 4, step 2) of order one and two (Sobol, 1990; 1993) based on the ANOVA decomposition (Hoeffding, 1948). Following Sobol (1996), the GSA can be used to determine the key inputs but also to determine a truncated version of the Hoeffding (ANOVA) functional decomposition, with key inputs, that approximates the analysed reflectance. In the case of the simulations with 5 inputs, the Hoeffding decomposition up to the order 2 comprises 15 functions (5 for each single parameters and  $5 \times 4 / 2 = 10$  functions for each couple). For all OPAC groups, the dependence of reflectance for VIS04 on the total ozone column and water vapour is negligible and is not taken into account in the reflectance approximation. Under the assumption of independent inputs, the Sobol indices enable a ranking of inputs or couple of inputs with respect their variance-based importance in the total output variance. The Fig. 5 presents the ranking of the Sobol indices of orders 1 and 2 for the output reflectance of VIS04 for the continental clean aerosol type. The blue bars represent the Sobol indices in descending order of single or couple of inputs. The red line represents the cumulated sum of the sorted Sobol indices. The variability of the solar zenithal angle, the ground albedo and the AOD are the three largest Sobol indices in that order and, together, they are at the origin of more than 98 % of the total variance of the output reflectance. For the example of VIS04 with the aerosol type “continental clean”, the reflectance  $R$  can be approximated by the following equation:

$$R = f_3(\theta_s) + f_2(\rho_g) + f_1(\tau) + \epsilon, \quad (9)$$

where  $f_1$ ,  $f_2$ , and  $f_3$  are functions,  $\theta_s$  is the solar zenith angle,  $\rho_g$  is the ground albedo and  $\tau$  is the aerosol optical depth. The approximation error  $\epsilon$ , also called the modelling error, exhibits a root mean square (RMS) less than  $0.7 \text{ W m}^{-2} \text{ sr}^{-1} \mu\text{m}^{-1}$  (1.5 % of the mean radiance values of  $47.3 \text{ W m}^{-2} \text{ sr}^{-1} \mu\text{m}^{-1}$ ). For all OPAC groups, the dependence of reflectance for VIS04 on the total ozone column and water vapour is negligible and is not taken into account in the reflectance approximation.

In this approximation, it is then possible to isolate the AOD  $\tau$  with respect the measured reflectance  $R$ , the other key inputs but the AOD. In the case of VIS04/continental clean, these remaining inputs are  $\theta_s$ ,  $\rho_g$  and the approximation error  $\epsilon$ :

$$\tau = F(R, \theta_s, \rho_g, \epsilon), \quad (10)$$

The reflectance  $R$  is associated with a measurement noise. Except for the solar zenithal angle, the other inputs may be known with a given uncertainty. In the AOD retrieval a main source of uncertainty is due to surface

albedo. The surface albedo fields are retrieved from MODIS using the Radiative Transfer Model RTTOV (Vidot et al., 2014), and the relative error of albedo used to create synthetic observations of the study is 10 %. The other inputs, such as total ozone column, comes from the NR simulation. With (Eq. 10), it is then possible to run a new Monte-Carlo analysis (Fig. 4, step 3) with random draws of noise measurements, approximation error  $\epsilon$  and uncertainty on the key inputs, in order to assess the root mean square error (RMSE) of the AOD retrieval. As an example, Fig. 6 presents the estimated RMSE of the AOD retrieval from the VIS04 reflectance, for continental clean aerosol type, for an uncertainty of 5 % on the ground albedo. The RMSE depends both of the solar zenithal angle and on the ground albedo.

To create the synthetic observations, each NR profile of aerosol is associated to an OPAC type

**Page 9 : [28] Déplacé depuis la page 9 (Déplacement n°2) Descheemaecker  
05/11/2018 15:08:00**

nder the assumption of independent inputs, the Sobol indices enable a ranking of inputs or couple of inputs with respect their variance-based importance in the total output variance. The Fig. 5 presents the ranking of the Sobol indices of orders 1 and 2 for the output reflectance of VIS04 for the continental clean aerosol type. The blue bars represent the Sobol indices in descending order of single or couple of inputs. The red line represents the cumulated sum of the sorted Sobol indices. The variability of the solar zenithal angle, the ground albedo and the AOD are the three largest Sobol indices in that order and, together, they are at the origin of more than 98 % of the total variance of the output reflectance.

**Page 9 : [28] Déplacé depuis la page 9 (Déplacement n°2) Descheemaecker  
05/11/2018 15:08:00**

nder the assumption of independent inputs, the Sobol indices enable a ranking of inputs or couple of inputs with respect their variance-based importance in the total output variance. The Fig. 5 presents the ranking of the Sobol indices of orders 1 and 2 for the output reflectance of VIS04 for the continental clean aerosol type. The blue bars represent the Sobol indices in descending order of single or couple of inputs. The red line represents the cumulated sum of the sorted Sobol indices. The variability of the solar zenithal angle, the ground albedo and the AOD are the three largest Sobol indices in that order and, together, they are at the origin of more than 98 % of the total variance of the output reflectance.

**Page 9 : [29] Déplacé vers la page 9 (Déplacement n°2) Descheemaecker  
05/11/2018 15:08:00**

nder the assumption of independent inputs, the Sobol indices enable a ranking of inputs or couple of inputs with respect their variance-based importance in the total output variance. The Fig. 5 presents the ranking of the Sobol indices of orders 1 and 2 for the output reflectance of VIS04 for the continental clean aerosol type. The blue bars represent the Sobol indices in descending order of single or couple of inputs. The red line represents the cumulated sum of the sorted Sobol indices. The variability of the solar zenithal angle, the ground albedo and the AOD are the three largest Sobol indices in that order and, together, they are at the origin of more than 98 % of the total variance of the output reflectance.

**Page 9 : [30] Mis en forme Descheemaecker 02/01/2019 11:59:00**

Anglais (États Unis)

**Page 9 : [30] Mis en forme Descheemaecker 02/01/2019 11:59:00**

Anglais (États Unis)

**Page 9 : [30] Mis en forme** Descheemaecker 02/01/2019 11:59:00

Anglais (États Unis)

**Page 9 : [30] Mis en forme** Descheemaecker 02/01/2019 11:59:00

Anglais (États Unis)

**Page 9 : [30] Mis en forme** Descheemaecker 02/01/2019 11:59:00

Anglais (États Unis)

**Page 9 : [30] Mis en forme** Descheemaecker 02/01/2019 11:59:00

Anglais (États Unis)

**Page 9 : [30] Mis en forme** Descheemaecker 02/01/2019 11:59:00

Anglais (États Unis)

**Page 9 : [30] Mis en forme** Descheemaecker 02/01/2019 11:59:00

Anglais (États Unis)

**Page 9 : [30] Mis en forme** Descheemaecker 02/01/2019 11:59:00

Anglais (États Unis)

**Page 9 : [30] Mis en forme** Descheemaecker 02/01/2019 11:59:00

Anglais (États Unis)

**Page 9 : [30] Mis en forme** Descheemaecker 02/01/2019 11:59:00

Anglais (États Unis)

**Page 9 : [30] Mis en forme** Descheemaecker 02/01/2019 11:59:00

Anglais (États Unis)

**Page 9 : [30] Mis en forme** Descheemaecker 02/01/2019 11:59:00

Anglais (États Unis)

**Page 9 : [30] Mis en forme** Descheemaecker 02/01/2019 11:59:00

Anglais (États Unis)

**Page 9 : [30] Mis en forme** Descheemaecker 02/01/2019 11:59:00

Anglais (États Unis)

**Page 9 : [30] Mis en forme** Descheemaecker 02/01/2019 11:59:00

Anglais (États Unis)

**Page 9 : [30] Mis en forme** Descheemaecker 02/01/2019 11:59:00

Anglais (États Unis)

**Page 9 : [30] Mis en forme** Descheemaecker 02/01/2019 11:59:00

Anglais (États Unis)

**Page 9 : [30] Mis en forme** Descheemaecker 02/01/2019 11:59:00

Anglais (États Unis)

**Page 9 : [30] Mis en forme** Descheemaecker 02/01/2019 11:59:00

Anglais (États Unis)

**Page 9 : [30] Mis en forme Descheemaecker 02/01/2019 11:59:00**

Anglais (États Unis)

**Page 9 : [30] Mis en forme Descheemaecker 02/01/2019 11:59:00**

Anglais (États Unis)

**Page 9 : [30] Mis en forme Descheemaecker 02/01/2019 11:59:00**

Anglais (États Unis)

**Page 9 : [31] Mis en forme Descheemaecker 02/01/2019 11:59:00**

Anglais (États Unis)

**Page 9 : [31] Mis en forme Descheemaecker 02/01/2019 11:59:00**

Anglais (États Unis)

**Page 9 : [31] Mis en forme Descheemaecker 02/01/2019 11:59:00**

Anglais (États Unis)

**Page 9 : [32] Mis en forme Descheemaecker 02/01/2019 11:59:00**

Anglais (États Unis)

**Page 9 : [32] Mis en forme Descheemaecker 02/01/2019 11:59:00**

Anglais (États Unis)

**Page 9 : [32] Mis en forme Descheemaecker 02/01/2019 11:59:00**

Anglais (États Unis)

**Page 9 : [33] Déplacé vers la page 9 (Déplacement n°5) Descheemaecker  
05/11/2018 15:18:00**

For all OPAC groups, the dependence of reflectance for VIS04 on the total ozone column and water vapour is negligible and is not taken into account in the reflectance approximation.

**Page 9 : [34] Mis en forme Descheemaecker 02/01/2019 11:59:00**

Anglais (États Unis)

**Page 9 : [34] Mis en forme Descheemaecker 02/01/2019 11:59:00**

Anglais (États Unis)

**Page 9 : [34] Mis en forme Descheemaecker 02/01/2019 11:59:00**

Anglais (États Unis)

**Page 9 : [34] Mis en forme Descheemaecker 02/01/2019 11:59:00**

Anglais (États Unis)

**Page 9 : [34] Mis en forme Descheemaecker 02/01/2019 11:59:00**

Anglais (États Unis)

**Page 9 : [34] Mis en forme Descheemaecker 02/01/2019 11:59:00**

Anglais (États Unis)

**Page 9 : [34] Mis en forme Descheemaecker 02/01/2019 11:59:00**

Anglais (États Unis)



|                                                                                                                                    |                       |                            |
|------------------------------------------------------------------------------------------------------------------------------------|-----------------------|----------------------------|
| <b>Page 9 : [34] Mis en forme</b>                                                                                                  | <b>Descheemaecker</b> | <b>02/01/2019 11:59:00</b> |
| Anglais (États Unis)                                                                                                               |                       |                            |
| <b>Page 9 : [34] Mis en forme</b>                                                                                                  | <b>Descheemaecker</b> | <b>02/01/2019 11:59:00</b> |
| Anglais (États Unis)                                                                                                               |                       |                            |
| <b>Page 9 : [34] Mis en forme</b>                                                                                                  | <b>Descheemaecker</b> | <b>02/01/2019 11:59:00</b> |
| Anglais (États Unis)                                                                                                               |                       |                            |
| <b>Page 9 : [34] Mis en forme</b>                                                                                                  | <b>Descheemaecker</b> | <b>02/01/2019 11:59:00</b> |
| Anglais (États Unis)                                                                                                               |                       |                            |
| <b>Page 9 : [34] Mis en forme</b>                                                                                                  | <b>Descheemaecker</b> | <b>02/01/2019 11:59:00</b> |
| Anglais (États Unis)                                                                                                               |                       |                            |
| <b>Page 9 : [35] Supprimé</b>                                                                                                      | <b>Descheemaecker</b> | <b>05/11/2018 15:48:00</b> |
| (Table 5) using                                                                                                                    |                       |                            |
| <b>Page 9 : [35] Supprimé</b>                                                                                                      | <b>Descheemaecker</b> | <b>05/11/2018 15:48:00</b> |
| (Table 5) using                                                                                                                    |                       |                            |
| <b>Page 9 : [36] Supprimé</b>                                                                                                      | <b>Descheemaecker</b> | <b>03/12/2018 14:57:00</b> |
| In order to keep a large number of profiles, the criteria are less restrictive than the ones described in Table 4. By this process |                       |                            |
| <b>Page 9 : [36] Supprimé</b>                                                                                                      | <b>Descheemaecker</b> | <b>03/12/2018 14:57:00</b> |
| In order to keep a large number of profiles, the criteria are less restrictive than the ones described in Table 4. By this process |                       |                            |
| <b>Page 18 : [37] Mis en forme</b>                                                                                                 | <b>Descheemaecker</b> | <b>02/01/2019 11:59:00</b> |
| Police :Gras, Anglais (États Unis)                                                                                                 |                       |                            |
| <b>Page 18 : [37] Mis en forme</b>                                                                                                 | <b>Descheemaecker</b> | <b>02/01/2019 11:59:00</b> |
| Police :Gras, Anglais (États Unis)                                                                                                 |                       |                            |
| <b>Page 18 : [37] Mis en forme</b>                                                                                                 | <b>Descheemaecker</b> | <b>02/01/2019 11:59:00</b> |
| Police :Gras, Anglais (États Unis)                                                                                                 |                       |                            |
| <b>Page 18 : [38] Mis en forme</b>                                                                                                 | <b>Descheemaecker</b> | <b>02/01/2019 11:59:00</b> |
| Anglais (États Unis)                                                                                                               |                       |                            |
| <b>Page 18 : [38] Mis en forme</b>                                                                                                 | <b>Descheemaecker</b> | <b>02/01/2019 11:59:00</b> |
| Anglais (États Unis)                                                                                                               |                       |                            |
| <b>Page 18 : [38] Mis en forme</b>                                                                                                 | <b>Descheemaecker</b> | <b>02/01/2019 11:59:00</b> |
| Anglais (États Unis)                                                                                                               |                       |                            |
| <b>Page 18 : [39] Mis en forme</b>                                                                                                 | <b>Descheemaecker</b> | <b>02/01/2019 11:59:00</b> |
| Anglais (États Unis)                                                                                                               |                       |                            |



|                                    |                       |                            |
|------------------------------------|-----------------------|----------------------------|
| <b>Page 18 : [41] Mis en forme</b> | <b>Descheemaecker</b> | <b>02/01/2019 11:59:00</b> |
| Anglais (États Unis)               |                       |                            |
| <b>Page 18 : [41] Mis en forme</b> | <b>Descheemaecker</b> | <b>02/01/2019 11:59:00</b> |
| Anglais (États Unis)               |                       |                            |
| <b>Page 18 : [41] Mis en forme</b> | <b>Descheemaecker</b> | <b>02/01/2019 11:59:00</b> |
| Anglais (États Unis)               |                       |                            |
| <b>Page 18 : [42] Mis en forme</b> | <b>Descheemaecker</b> | <b>02/01/2019 11:59:00</b> |
| Anglais (États Unis)               |                       |                            |
| <b>Page 18 : [42] Mis en forme</b> | <b>Descheemaecker</b> | <b>02/01/2019 11:59:00</b> |
| Anglais (États Unis)               |                       |                            |
| <b>Page 18 : [42] Mis en forme</b> | <b>Descheemaecker</b> | <b>02/01/2019 11:59:00</b> |
| Anglais (États Unis)               |                       |                            |
| <b>Page 18 : [43] Mis en forme</b> | <b>Descheemaecker</b> | <b>02/01/2019 11:59:00</b> |
| Anglais (États Unis)               |                       |                            |
| <b>Page 18 : [43] Mis en forme</b> | <b>Descheemaecker</b> | <b>02/01/2019 11:59:00</b> |
| Anglais (États Unis)               |                       |                            |
| <b>Page 18 : [43] Mis en forme</b> | <b>Descheemaecker</b> | <b>02/01/2019 11:59:00</b> |
| Anglais (États Unis)               |                       |                            |
| <b>Page 18 : [44] Mis en forme</b> | <b>Descheemaecker</b> | <b>02/01/2019 11:59:00</b> |
| Anglais (États Unis)               |                       |                            |
| <b>Page 18 : [44] Mis en forme</b> | <b>Descheemaecker</b> | <b>02/01/2019 11:59:00</b> |
| Anglais (États Unis)               |                       |                            |
| <b>Page 18 : [44] Mis en forme</b> | <b>Descheemaecker</b> | <b>02/01/2019 11:59:00</b> |
| Anglais (États Unis)               |                       |                            |
| <b>Page 18 : [45] Mis en forme</b> | <b>Descheemaecker</b> | <b>02/01/2019 11:59:00</b> |
| Anglais (États Unis)               |                       |                            |
| <b>Page 18 : [45] Mis en forme</b> | <b>Descheemaecker</b> | <b>02/01/2019 11:59:00</b> |
| Anglais (États Unis)               |                       |                            |
| <b>Page 18 : [45] Mis en forme</b> | <b>Descheemaecker</b> | <b>02/01/2019 11:59:00</b> |
| Anglais (États Unis)               |                       |                            |
| <b>Page 18 : [46] Mis en forme</b> | <b>Descheemaecker</b> | <b>02/01/2019 11:59:00</b> |
| Anglais (États Unis)               |                       |                            |
| <b>Page 18 : [46] Mis en forme</b> | <b>Descheemaecker</b> | <b>02/01/2019 11:59:00</b> |
| Anglais (États Unis)               |                       |                            |
| <b>Page 18 : [46] Mis en forme</b> | <b>Descheemaecker</b> | <b>02/01/2019 11:59:00</b> |
| Anglais (États Unis)               |                       |                            |

**Page 18 : [47] Mis en forme** Descheemaecker 02/01/2019 11:59:00  
Anglais (États Unis)

**Page 18 : [47] Mis en forme** Descheemaecker 02/01/2019 11:59:00  
Anglais (États Unis)

**Page 18 : [47] Mis en forme** Descheemaecker 02/01/2019 11:59:00  
Anglais (États Unis)

**Page 18 : [47] Mis en forme** Descheemaecker 02/01/2019 11:59:00  
Anglais (États Unis)

**Page 18 : [47] Mis en forme** Descheemaecker 02/01/2019 11:59:00  
Anglais (États Unis)

**Page 18 : [47] Mis en forme** Descheemaecker 02/01/2019 11:59:00  
Anglais (États Unis)

**Page 18 : [47] Mis en forme** Descheemaecker 02/01/2019 11:59:00  
Anglais (États Unis)

**Page 18 : [48] Mis en forme** Descheemaecker 02/01/2019 11:59:00  
Anglais (États Unis)

**Page 18 : [48] Mis en forme** Descheemaecker 02/01/2019 11:59:00  
Anglais (États Unis)

**Page 18 : [48] Mis en forme** Descheemaecker 02/01/2019 11:59:00  
Anglais (États Unis)

**Page 18 : [49] Mis en forme** Descheemaecker 02/01/2019 11:59:00  
Anglais (États Unis)

**Page 18 : [49] Mis en forme** Descheemaecker 02/01/2019 11:59:00  
Anglais (États Unis)

**Page 18 : [49] Mis en forme** Descheemaecker 02/01/2019 11:59:00  
Anglais (États Unis)

**Page 22 : [50] Supprimé** Descheemaecker 02/01/2019 10:29:00

Massart, S., Cariolle, D., and Peuch, V.: Towards an improvement of the atmospheric ozone distribution and variability by assimilation of satellite data, *Comptes Rendus Geoscience*, 337, 1305–1310, 2005.

**Page 22 : [51] Supprimé** Descheemaecker 02/01/2019 10:36:00

Sobol, I.: On freezing of unessential variables, *Moscow University Mathematics Bulletin*, 51, 60–62, 1996.

**Page 24 : [52] Supprimé** Descheemaecker 03/12/2018 15:07:00

| Species | DD | SS | SIA | OC | BC |
|---------|----|----|-----|----|----|
| MIAM,   | 1  | -  | -   | -  | -  |

|               |   |   |   |     |     |
|---------------|---|---|---|-----|-----|
| MICM,<br>MINM |   |   |   |     |     |
| SSAM,<br>SSCM | - | 1 | - | -   | -   |
| WASO          | - | - | 1 | 0.5 | 0.2 |
| INSO          | - | - | - | 0.5 | -   |
| SOOT          | - | - | - | -   | 0.8 |

**Table 3:** Correspondence of MOCAGE and OPAC aerosol species. Aerosol species of OPAC are mineral dust (nucleation mode: MINM ; accumulation mode: MIAM ; coarse mode: MICM), sea salts (accumulation mode: SSAM ; coarse mode: SSCM), soluble aerosols (water soluble: WASO), insoluble aerosols (INSO) and soots (SOOT), while aerosols of MOCAGE are desert dusts (DD), sea salts (SS), secondary inorganic aerosols (SIA; ammonium, sulfate and nitrate) and organic and black carbons (OC, BC).

# Monitoring aerosols over Europe: an assessment of the potential benefit of assimilating the VIS04 measurements from the future MTG/FCI geostationary imager

5 Maxence Descheemaeker<sup>1</sup>, Matthieu Plu<sup>1</sup>, Virginie Marécal<sup>1</sup>, Marine Claezman<sup>2</sup>, Francis Olivier<sup>2</sup>,  
Youva Aoun<sup>3</sup>, Philippe Blanc<sup>3</sup>, Lucien Wald<sup>3</sup>, Jonathan Guth<sup>1</sup>, Bojan Sič<sup>1</sup>, Jérôme Vidot<sup>4</sup>, Andrea  
Piacentini<sup>5</sup>, Béatrice Josse<sup>1</sup>

1CNRM, Université de Toulouse, Météo-France, CNRS, Toulouse, France

2Thales Alenia Space, Cannes la Bocca, 06156, France

10 3Mines ParisTech, PSL Research University, O.I.E.- Center for Observation, Impacts, Energy, Sophia Antipolis, 06904,  
France

4Centre de Météorologie Spatiale, Météo-France, 22300, Lannion, France

5CERFACS – CNRS, UMR5318, 31057, Toulouse, France

*Correspondence to:* Maxence Descheemaeker (maxence.descheemaeker@meteo.fr)

15 **Abstract.** The study assesses the possible benefit of assimilating Aerosol Optical Depth (AOD) from the future spaceborne  
sensor FCI (Flexible Combined Imager) for air quality monitoring in Europe. An Observing System Simulation Experiment  
(OSSE) was designed and applied over a 4-month period that includes a severe pollution episode. The study focuses on the  
FCI channel centred at 444 nm, which is the shortest wavelength of FCI. A Nature Run (NR) and four different Control Runs  
of the MOCAGE chemistry-transport model were designed and evaluated to guarantee the robustness of the OSSE results.  
20 The AOD synthetic observations from the NR were disturbed by errors that are typical of the FCI. The variance of the FCI  
AOD at 444 nm was deduced from a global sensitivity analysis that took into account the aerosol type, surface reflectance  
and different atmospheric optical properties. The experiments show a general benefit on all statistical indicators of the  
assimilation of the FCI AOD at 444 nm for aerosol concentrations at surface over Europe, and also a positive impact during  
the severe pollution event. The simulations with data assimilation reproduced spatial and temporal patterns of PM<sub>10</sub>  
25 concentrations at surface better than without assimilation all along the simulations and especially during the pollution event.  
The advantage of assimilating AOD from a geostationary platform over a Low Earth Orbit satellite has also been quantified.  
This work demonstrates the capability of data from the future FCI sensor to bring an added value to the MOCAGE aerosol  
simulations, and in general, to other chemistry transport models.

## 1 Introduction

Aerosols are liquid and solid compounds suspended in the atmosphere, whose sizes range from a few nanometers to several tens of micrometers, and whose lifetime in the troposphere varies from a few hours to a few weeks (Seinfeld and Pandis, 1998). Stable sulfate aerosols at high altitude can last for years (Chazette et al., 1995). The sources of aerosols may be natural (dusts, sea salt, ashes from volcanic eruptions, for instance) or anthropogenic (from road traffic, residential heating, industries, for instance), and they can be transported up to thousands of kilometers. Aerosols are known to have significant impacts on climate (IPCC, 2007) and on air quality and further on human health as WHO (2014) estimated over 3 million deaths in 2012 to be due to aerosols.

Aerosols absorb and diffuse solar radiation, which leads to local heating of the aerosol layer and cooling of the climate system through the backscatter of solar radiation to space for most of the aerosols, except for black carbon (Stocker et al., 2013). The absorption of solar radiation modifies the vertical temperature profile, affecting the stability of the atmosphere and cloud formation (Seinfeld and Pandis, 1998). Aerosols, as condensation nuclei, play a significant role in the formation and life cycle of clouds (Seinfeld and Pandis, 1998). Deposition of aerosols on Earth's surface may also affect surface properties and albedo. All these effects show that aerosols play a key role on the energy budget of the climate system.

Aerosols, also called particulate matter in the context of air quality, are responsible for serious health problems all over the world, as they are known to favor respiratory and cardiovascular diseases as well as cancers (Brook et al., 2004). The World Health Organization (WHO) has set regulatory limits for aerosol concentrations, respectively  $20 \mu\text{g}\cdot\text{m}^{-3}$  and  $10 \mu\text{g}\cdot\text{m}^{-3}$  annual mean for  $\text{PM}_{10}$  and  $\text{PM}_{2.5}$  (particulate matter with a diameter less than 10 and 2.5  $\mu\text{m}$ , respectively) concentrations. The European Union regulation introduces also  $\text{PM}_{10}$  daily mean limits of  $50 \mu\text{g}\cdot\text{m}^{-3}$ . The presence of a dense layer of aerosols can also affect air traffic by the reduction of visibility (Bäumer et al., 2008) and by risks of disruptions of engines of air planes (Guffanti et al., 2010). Therefore, it is essential to accurately determine the evolution of the concentration and size of the different types of aerosols in space and time, in order to assess their effect on climate and on air quality and to mitigate their impacts. A pertinent approach to achieve a continuous and accurate monitoring of aerosols is to combine measurements and models, a good example being the Copernicus Atmosphere Monitoring Service (CAMS) (<http://www.atmosphere.copernicus.eu/>; Peuch and Engelen, 2012; Eskes et al., 2015; Marécal et al, 2015).

Ground-based stations, which measure aerosol and gas concentrations in-situ, have been used for several decades to monitor air quality, such as the stations in the Air Quality e-Reporting program (AQeR, <https://www.eea.europa.eu/data-and-maps/data/aqereporting-2>) from the European Environment Agency (EEA). Other observations can also be used to measure aerosols. The AERONET (AErosol RObotic NETwork) program (<https://aeronet.gsfc.nasa.gov/>) performs the retrieval of the Aerosol Optical Depth (AOD) at several ground stations (Holben et al., 1998). Similarly, AOD observations can be retrieved from images taken in different channels by imagers aboard Low Earth Orbit (LEO) or GEOstationary (GEO) satellites. Generally, AOD from satellite provides a better spatial coverage than ground-based stations at the expense of additional sources of uncertainty, such as the surface reflectance. An example of AOD product from LEO satellites is the Daily Level 2

AOD, from the Moderate Resolution Imaging Spectroradiometer (MODIS) (Levy et al., 2013) sensor on board Terra and Aqua (MOD 04 & MYD 04 products). This AOD product is provided at a 10 km resolution every 5 min, down to 1 km. Sensors on geostationary orbit satellites can continuously scan one third of Earth's surface much more frequently than low Earth orbit satellites. The SEVIRI (Spinning Enhanced Visible and Infra-Red Imager) sensor, aboard MSG (Meteosat  
5 Second Generation), is an example of a GEO sensor providing information on aerosols. Different AOD are retrieved over lands from SEVIRI data in the VIS0.6 and VIS0.8 channels, respectively centered at 0.635  $\mu\text{m}$  (0.56  $\mu\text{m}$  – 0.71  $\mu\text{m}$ ) and 0.81  $\mu\text{m}$  (0.74  $\mu\text{m}$  – 0.88 $\mu\text{m}$ ). AOD products are retrieved following different methods. Carrer et al. (2010) presented a method to estimate a daily quality-controlled AOD based on a directional and temporal analysis of SEVIRI observations of channel VIS0.6. Another method consists in matching simulated Top Of the Atmosphere (TOA) reflectances (from a set of 5  
10 models) with TOA SEVIRI reflectances (Bernard et al., 2011) to obtain an AOD for VIS0.6. Another method (Mei et al., 2012) estimates the AOD and the aerosol type by analysing the reflectances at 0.6 and 0.8  $\mu\text{m}$  in three orderly scan times. These methods derive AOD for specific channels, from the combined analysis of several channels and very often using several images if not all of a day to have information.

Numerical models, even if they are subject to errors, are necessary to describe the variability of the aerosol types and of their  
15 concentrations with space and time, as a complement to observations. Aerosol forecasts on regional and global scales are made by three-dimensional models, such as the chemistry-transport model (CTM) MOCAGE (Sič et al., 2015; Guth et al., 2016). MOCAGE is currently used daily to provide air quality forecasts to the French platform Prev'Air (Rouil et al., 2009) and also to the European CAMS ensemble (Marécal et al., 2015). Data assimilation of AOD can be used in order to improve the representation of aerosols within the model simulations (Benedetti et al, 2009, Sič et al, 2016). Studies on geostationary  
20 sensors have also proved a positive effect of the assimilation of AOD, see e.g. Yumimoto, et al. (2016), who assessed this positive effect using the AOD at 550 nm from AHI (Advanced Himawari Imager) sensor aboard Himawari-8.

The future geostationary Flexible Combined Imager (FCI, URD Eumetsat, 2010), that will be aboard the Meteosat Third Generation satellite (MTG), will perform a full disk in 10 min, and in 2.5 min for the European Regional-Rapid-Scan which covers one-quarter of the full disk, with a spatial resolution of 1 km at nadir and around 2 km in Europe. Like AHI, FCI is  
25 designed to have multiple wavelengths and the assimilation of its data into models should be beneficial to aerosol monitoring. The aim of the paper is to assess the possible benefit of assimilating measurements from the future MTG/FCI sensor for monitoring aerosols on regional scale over Europe. Since MOCAGE cannot assimilate, AOD at multiple wavelengths simultaneously (Sič et al, 2016), the study focusses on the assimilation of AOD from a single channel. Among the 16 channels of FCI, the VIS04 band (centered at 444 nm) has been chosen because it covers the shortest wavelengths,  
30 which is expected to be the most relevant to detect small particles (Petty, 2006). Besides, VIS04 is a new channel compared to MSG/SEVIRI, which shortest band is around 650nm (Carrer et al, 2010), and so assessing the benefit of VIS04 over Europe is original.

As FCI is not yet operational, an OSSE (Observing System Simulation Experiments) approach (Timmermans et al., 2015) is used in this study. In an OSSE, synthetic observations are created from a numerical simulation that is as close as possible to



the real atmosphere (the Nature Run), and then are assimilated in a different model configuration. The differences between model outputs with and without assimilation provide an assessment of the added value of the assimilated data. OSSE have been widely developed and used for assessing and designing future sensors for air quality monitoring: for carbon monoxide (Edwards et al, 2009) and ozone (Claeyman et al, 2011; Zoogman et al, 2014) from LEO or GEO satellites (Lahoz et al, 2012), and for aerosol analysis from GEO satellites over Europe (Timmermans et al, 2009a, 2009b). Some of these studies have successfully assessed the potential benefit of future satellites and they have helped to design the instruments (Claeyman et al, 2011), however cautions and limitations on the OSSE for air quality have been addressed (Timmermans et al, 2009a, 2009b, 2015), such as the “identical twin problem” and the control of the boundary conditions of the model, and the accuracy and the representativeness of the synthetic observations.

By designing an OSSE that takes into account these precautions, the present study proposes a quantitative assessment of the potential benefit of assimilating AOD at 444 nm from FCI for aerosol monitoring in Europe. The OSSE and its experimental setup are described in Sect. 2. Then, the case study and an evaluation of the ability of the reference simulation to represent a true state of the atmosphere are presented. The calculation of synthetic observations is explained in Sect. 3. An evaluation of the control simulations is made in Sect. 4. In Sect. 5, the results of the assimilation of FCI synthetic observations are presented and discussed. Finally, Sect. 6 concludes this study.

## 2 Methodology

### 2.1 Experimental setup

Figure 1 shows the general principle of the OSSE (Timmermans et al, 2015). A reference simulation, called “Nature Run” (NR) is assumed to represent the “true” state of the atmosphere. AOD synthetic observations are generated by combining AOD retrieved from the NR and the error characteristics of FCI. These error characteristics are described in Sect. 3. The second kind of simulations in the OSSE is the “Control Run” (CR) simulation. The differences between NR’s output and CR’s output should represent the errors of current models without use of observations. Finally, the assimilation run (AR) is done by assimilation in the CR of the synthetic observations. To assess the added value of the instrument, a comparison is made between the output of the AR and the NR and between the CR and the NR. If the AR is closer to the NR than the CR, it means that the observations provide useful information to the assimilation system. The differences between AR and CR quantify the added value of the instrument.

The NR should be as close as possible to the actual atmosphere because it serves as the reference to produce the synthetic observations. The temporal and spatial variations of the NR should approximate those of actual observations. An evaluation of the NR, presented in Sect. 2.2, includes a comparison of the model with aerosol concentrations and AOD data from ground-based stations.

In addition, the differences between the NR and the CR must be significant and approximate those between the CR and the actual observations. Ideally, the NR and CR should be run with different models, as the use of the same model could lead to

over-optimistic results (Masutani et al., 2010); this issue is called the “identical twin” problem. It is strongly recommended to evaluate the spatio-temporal variability of the NR and its differences with the CR to avoid this “identical twin” problem (Timmermans et al., 2015). As MOCAGE is used for both NR and CR in the present study, a method similar to that used in Claeys et al. (2011) is proposed. Instead of one CR, various CR simulations (Fig. 1) are performed in different configurations, and they are assessed independently and compared to the NR to ensure the robustness of the OSSE results. An evaluation of those differences is presented in Sect. 4.

## 2.2 MOCAGE

The CTM model used in this study is MOCAGE (Modèle de Chimie Atmosphérique à Grande Echelle, Guth et al, 2016), that has been developed for operational and research purposes. MOCAGE is a three-dimensional model that covers the global scale, down to regional scale using two-way nested grids. MOCAGE vertical resolution is not uniform: the model has 47 vertical sigma-hybrid altitude-pressure levels from the surface up to 5 hPa. Levels are denser near the surface, with a resolution of about 40 m in the lower troposphere and 800 m in the lower stratosphere.

MOCAGE simulates gases (Josse et al., 2004; Dufour et al., 2004), primary aerosols (Martet et al., 2009; Sič et al., 2015) and secondary inorganic aerosols (Guth et al, 2016). Aerosols species in the model are primary species: desert dust, sea salt, black carbon and organic carbon, and secondary inorganic species: sulfate, nitrate and ammonium, formed from gaseous precursors in the model. For each type of aerosols (primary and secondary), the same 6 bin sizes are used between 2 nm and 50  $\mu\text{m}$ : 2 nm - 10 nm - 100 nm - 1  $\mu\text{m}$  - 2.5  $\mu\text{m}$  - 10  $\mu\text{m}$  - 50  $\mu\text{m}$ . All emitted species are injected every 15 mins in the five lower levels (up to 0.5 km), following an hyperbolic decay with altitude: the fraction of pollutants emitted in the lowest level is 52 %, and then respectively 26 %, 13 %, 6 % and 3 % in the four levels above. Such a vertical repartition ensures continuous concentration fields in the first levels, which guarantee a proper behavior of the of the semi-Lagrangian advection scheme. Carbonaceous particles are emitted using emission inventories. Sea salt emissions are simulated using a semi-empirical source function (Gong, 2003; Jaeglé et al., 2011) with the wind speed and the water temperature as input. Desert dust are emitted, using wind speed, soil moisture and surface characteristics based on Marticorena and Bergametti (1995) which give the total emission mass, that is then distributed in each bin according to Alfaro et al. (1998). Secondary inorganic aerosols are included in MOCAGE using the module ISORROPIA II (Fountoukis and Nenes, 2007), which solves the thermodynamic equilibrium between gaseous, liquid and solid compounds. Chemical species are transformed by the RACMOBUS scheme, which is a combination of the RACM scheme (Regional Atmospheric Chemistry Mechanism; Stockwell et al., 1997) and the REPROBUS scheme (Reactive Processes Ruling the Ozone Budget in the Stratosphere; Lefèvre et al., 1994). Dry and wet depositions of gaseous and particulate compounds are parameterized as in Guth et al. (2016).

MOCAGE uses meteorological forecasts (wind, pressure, temperature, specific humidity, precipitation) as input, such as Météo-France operational meteorological forecast from ARPEGE (Action de Recherche Petite Echelle Grande Echelle), or ECMWF (European Centre for Medium-Range Weather Forecasts) meteorological forecast from IFS (Integrated Forecast

System). A semi-lagrangian advection scheme (Williamson and Rasch, 1989), a parameterization for convection (Bechtold et al., 2001) and a diffusion scheme (Louis, 1979) are used to transport gaseous and particulate species.

### 2.3 Assimilation system PALM

The assimilation system of MOCAGE (Massart et al., 2009), is based on the 3-Dimensional First Guess at Appropriate Time (3D-FGAT) algorithm. This method consists of minimizing the cost function  $J$ :

$$J(\delta x) = J_b(\delta x) + J_o(\delta x) = \frac{1}{2}(\delta x)^T \mathbf{B}^{-1} \delta x + \frac{1}{2} \sum_{i=0}^N (d_i - \mathbf{H}_i \delta x)^T \mathbf{R}_i^{-1} (d_i - \mathbf{H}_i \delta x), \quad (1)$$

where  $J_b$  and  $J_o$  are respectively the part of the cost function related to the model background and to the observations;  $\delta x = x - x^b$  is the difference between the model background  $x^b$  and the state of the system  $x$ ;  $d_i = y_i - H_i x^b(t_i)$  is the difference between the observation  $y_i$  and the background  $x^b$  in the observations space at time  $t_i$ ;  $H_i$  is the observation operator;  $\mathbf{H}$  its linearized version;  $\mathbf{B}$  is the background covariance matrix; and  $\mathbf{R}_i$  is the observation covariance matrix at time  $t_i$ .

The general principal for the assimilation of AOD (Benedetti et al, 2009) is the same as in Sič et al. (2016). The control variable  $x$  used in the minimization is the 3D total aerosol concentration. After minimization of the cost function, an analysis increment  $\delta x^a$ , is obtained, which is a 3D-total aerosol concentration. This increment  $\delta x^a$  is then converted into all MOCAGE aerosol bins according to their local fractions of the total aerosol mass in the model background. The result is added to the background aerosol field at the beginning of the cycle. Then the model is run over the 1-hour cycle length to obtain the analysis. The state at the end of this cycle is used as a departure point for the background model run of the next cycle.

The observation operator  $\mathbf{H}$  for AOD uses as input the concentrations of all bins (6) of the seven types of aerosols and the associated optical properties. For this computation also, the control variable  $x$  is converted into all MOCAGE aerosol bins according to their local fractions of the total aerosol mass in the model background. The AOD is computed for each model layer to obtain, by summing, the AOD of the total column. The optical properties of the different aerosol types are issued from a look-up table, that is computed from the Mie code scheme of Wiscombe (1980, 1979, revised 1996) for spherical and homogeneous particles. The refractive indices come from Kirchstetter et al. (2004) for organic carbon and from the Global Aerosol Data Set (GADS, Köpke et al., 1997) for other aerosol species. The hygroscopicity of sea salts and secondary inorganic aerosols are taken into account based on Gerber (1985).

While the observation operator is designed to assimilate AOD of any wavelength from the UV to the IR, the assimilation system MOCAGE-PALM cannot assimilate data of several wavelengths simultaneously (Sič et al, 2016). This limitation is due to the choice of the control vector, which is the 3D total aerosol concentration: assimilating different wavelengths simultaneously would require to rethink and to extend the control vector, for instance splitting it by aerosol size bins or types. This explains why the study focuses on the assimilation of AOD of a single wavelength.

## 2.4 Case study

The period extends from the 1<sup>st</sup> of January to the 30<sup>th</sup> of April 2014, and includes several days of PM pollution over Europe. From the 7<sup>th</sup> to 15<sup>th</sup> of March, a secondary particles episode (EEA report 2014) occurs, while from 29<sup>th</sup> March to 5<sup>th</sup> April a dust plume originating from the Sahara Desert propagates Northwards to Europe (Vieno et al., 2016).

5 The MOCAGE simulation covers the whole period from January to April 2014, on a global domain at 2° resolution and a nested regional domain, that covers Europe, from 28 °N to 72 °N and from 26 °W to 46 °E, at 0.2 ° resolution (see Fig. 2). A 4-month spin-up is made before the simulation. The NR is forced by ARPEGE meteorological analysis. Emissions of chemical species in the global domain come from MACCity (van der Werf et al., 2006; Lamarque et al., 2010; Granier et al., 2011) for anthropogenic gas species and biogenic species are from GEIA for the global and regional domain. ACCMIP project emissions are used for anthropogenic organic and black carbon emissions at the global scale. The TNO-MACC-III inventory for year 2011 provides anthropogenic emissions in the regional domain. TNO-MACC-III emissions are the latest update of the TNO-MACC inventory based on the methodology developed in the MACC-II project described in Kuenen et al. (2014). These anthropogenic emissions are completed, on our regional domain, at the boundary of the MACC-III inventory domain by emissions from MACCity. Daily biomass burning sources of organic and black carbon and gases from 15 the Global Fire Assimilation System (GFAS) (Kaiser et al., 2012) are injected in the model. The NR includes secondary organic aerosols (SOA) in order to enhance its realism and to well fit the observations made at ground-based stations over Europe. Standard ratios from observations (Castro et al., 1999) are used to simulate the portion of secondary carbon species, 40 % in winter, from the primary carbon species in the emission input.

The NR is compared to real observations from AERONET AOD observations and AQeR surface concentrations, using 20 common statistical indicators: mean bias (B), modified normalized mean bias (MNMB), root mean square error (RMSE), fractional gross error (FGE), Pearson correlation coefficient ( $R_p$ ) and Spearman correlation coefficient ( $R_s$ ). While the Pearson correlation measures the linear relation between the two datasets, the Spearman correlation is a mean to assess their monotonic relationship.

The AQeR stations are mainly located over Western Europe (Fig. 2). After selection of the surface stations that are 25 representative of background air pollution (following Joly and Peuch, 2012), 597 and 535 stations are respectively used for the PM<sub>10</sub>, PM<sub>2.5</sub> comparison. Figure 2 represents the mean surface concentration of the NR and selected AQeR measurements over the domain, from January to April 2014. The left panel shows the PM<sub>10</sub> concentrations of the NR in the background and the AQeR concentrations as circle, while the right panel shows the PM<sub>2.5</sub> concentrations. The concentration of the NR PM<sub>10</sub> and PM<sub>2.5</sub> are generally underestimated compared to observations. Nevertheless, on both figures, the spatial 30 variability and particularly the location of maxima are reasonably well represented. Over the European continent, the NR and AQeR data show clear maxima in the center of Europe for both PM<sub>10</sub> and PM<sub>2.5</sub> concentrations, even if the NR underestimates these maxima.

Table 1 shows the statistical indicators of this comparison for hourly surface concentrations in  $PM_{10}$  and  $PM_{2.5}$ . A negative mean bias is observed, around  $-6.23 \mu\text{g}\cdot\text{m}^{-3}$  ( $\sim -35.1\%$ ) for  $PM_{10}$  and  $-3.20 \mu\text{g}\cdot\text{m}^{-3}$  ( $\sim -24.7\%$ ) for  $PM_{2.5}$ . The RMSE is equal to  $16.2 \mu\text{g}\cdot\text{m}^{-3}$  for  $PM_{10}$  and  $11.9 \mu\text{g}\cdot\text{m}^{-3}$  for  $PM_{2.5}$  while the FGE equals to 0.56 and 0.543. The factor of two is equal to 64.7 % and 67.5 % for  $PM_{10}$  and  $PM_{2.5}$ . Pearson and Spearman correlations are respectively 0.452 and 0.535 for  $PM_{10}$  and  $PM_{2.5}$  and 0.537 and 0.602 for  $PM_{10}$  and  $PM_{2.5}$ . The NR underestimation is greater for  $PM_{10}$  than for  $PM_{2.5}$  in relative differences. This suggests a lack of aerosol concentrations in the  $PM_{10-2.5}$  (concentration of aerosols between  $2.5 \mu\text{m}$  and  $10 \mu\text{m}$ ). Not taking into account wind-blown crustal aerosols may cause a potential underestimation of PM in models (Im et al., 2015). Taking them into account needs a detailed ground type inventory to compute those emissions unavailable in MOCAGE. For  $PM_{2.5}$ , the underestimation of aerosol concentrations can be due to a lack of carbonaceous species (Prank et al., 2016). Other possible reasons for PM negative bias at surface are the underestimation of emissions in cold winter period and the uncertainty in the modelling of stable winter conditions with shallow surface layers.

A time-series graph of the median NR surface concentrations and the median surface concentrations of the AQeR stations are presented in Fig. 3. Compared to ground-based AQeR data (in black), the NR (in purple) generally underestimates the  $PM_{10}$  and the  $PM_{2.5}$  concentrations, especially during the 7<sup>th</sup>-15<sup>th</sup> March pollution episode. However, the variations and maxima of the NR concentrations of PM are generally well represented. Furthermore, around 65 % of model concentrations are relatively close to observations as shown by the factor of 2 in Table 1. The variability of NR concentrations is thus consistent with AQeR station concentrations.

Table 2 gives an evaluation of the NR against the daily mean of the AOD at 500 nm obtained from 84 AERONET stations in the regional domain from January to April 2014. The statistical indicators show good consistency between the NR and AERONET observations. However, like the results showed at global scale (Sič et al, 2015), MOCAGE tends to overestimate AOD: although small, the AOD bias is positive. While PM concentrations at surface are underestimated in the NR, different reasons may explain an overestimation of AOD. The vertical distribution of aerosol concentrations in the model is largely controlled by vertical transport, removal processes and by the prior assumptions done on the aerosol emission profiles. However, these processes may have large variability and they are prone to large uncertainties (Sič et al, 2015). Another possible explanation is the uncertainty of the size distribution of aerosols that can affect significantly the optical properties. More generally, the assumptions that underly the computation of optical properties are largely uncertain and they can affect the computation of AOD by a factor of 50% (Curci et al, 2015): the mixing state assumption, the uncertainty on refractive indices and on hygroscopicity growth. These uncertainties on aerosol vertical profiles, size distribution, and optical properties may explain the decorrelation between AOD and PM concentrations at surface, and so why the MOCAGE NR has a positive bias in AOD while underestimating PM at surface. However, both the PM and AOD correlation errors of the NR remain in a realistic range.

As a result, the NR simulation exhibits surface concentrations and AOD in the same range compared to those from ground-based stations and shows similar spatial and temporal variations, which makes the NR acceptable for the OSSE.

### 3 Generation of synthetic AOD observations

The study focuses on the added value of assimilating AOD at the central wavelength (444 nm) of the FCI/VIS04 spectral band. Since the assimilation of AOD from several wavelengths simultaneously is not possible (Sect. 2.3), the choice of the single channel VIS04 is mainly driven by the fact that it is the shortest wavelengths of FCI, that is a priori the most favorable to the detection of fine particles.

Thus, synthetic AOD observations at 444nm are created over the MOCAGE simulated regional domain, from the NR simulation 3D fields: all aerosol concentrations per type and per size bins, and meteorological variables. At every gridpoint of the NR regional domain where the solar zenithal angle is below  $80^\circ$  (daytime) and where clouds are absent, an AOD value at 444 nm is computed using the MOCAGE observation operator described above (Sect. 2.3). In order to take into account the error characteristics of the FCI VIS04 AOD, a random noise is then added to this NR AOD value.

To estimate the variance of this random noise, the general principle is to assess and quantify the respective sensitivity of the FCI VIS04 top-of-the-atmosphere reflectance to AOD and to the other variables. For doing this, the FCI simulator developed by Aoun et al (2016), based on the Radiative Transfer Model (RTM) libRadtran (Mayer and Killings, 2005), has been used. This simulator computes the reflectance in the different spectral bands of FCI, as a function of different input atmospheric parameters (AOD  $\tau$ , total column water vapor, ozone content), ground albedo  $\rho_g$  and solar zenithal angle  $\theta_s$ , for different OPAC (Optical Properties of Aerosols and Clouds, Hess et al., 1998) aerosol types: dust, maritime clean, maritime polluted, continental clean, continental average, continental polluted, and urban.. The FCI simulator takes into account the spectral response sensitivity and the measurement noise representative of the FCI VIS04 spectral band (415-475 nm).

By applying a Global Sensitivity Analysis to this FCI simulator ran on a large dataset (see the Appendix for the details of the method), a look-up table of the RMSE of AOD is derived. It depends on the OPAC type, on the relative error of surface albedo, on the solar zenithal angle and of the ground albedo value. The classification of each MOCAGE profile into the OPAC types relies on three parameters (Tab. 3): the surface concentration, the main surface species and the proportion in relation to the total aerosols concentrations. A species is described as a main species if its concentrations, [species], is above each other concentrations, for example DD is a main species if  $[DD] > [SS]$  &  $[DD] > [IWS]$ . An example of NR profiles (7<sup>th</sup> March 2014 at 12 UTC) decomposed in OPAC type is presented in Fig. 4. A small part of the profiles are dismissed where MOCAGE profiles do not match one of the OPAC types, such as profiles over ocean where *IWS* (Insoluble, Water Soluble and Soot; Tab. 3) is greater than DD (Desert Dust) and SS (Sea Salt). A larger part of profiles are dismissed because of night-time profiles and cloudy conditions. Figure 5 represents the average number of NR AOD that are retained per day for assimilation. After these filters apply, between 10 % and 20 % of profiles are kept every hour. The density of these profiles is higher in the south of the domain, which is directly correlated to the quantity of direct sunlight available. Over the continent, between 1 and 4 profiles can be assimilated per day at each grid-box location.

On every NR profiles that is kept, an AOD error is introduced, by addition of random value from an unbiased Gaussian with a standard deviation derived from the AOD RMSE look-up table, calculated as explained above. The surface albedo fields are taken from MODIS using the Radiative Transfer Model RTTOV (Vidot et al., 2014). A relative error of 10% is assumed for ground albedo, which corresponds to a realistic value (Vidot et al, 2014). An example of the synthetic observations is presented in Fig. 6. It represents the NR AOD, the synthetic observations and the noise applied to NR AOD for the 7<sup>th</sup> March 2014 at 12 UTC.

#### 4 Controls runs (CRs) and their comparison to NR

Sect. 2 showed an evaluation of the NR compared to real observations. Another requirement of the OSSE is the evaluation of differences between the NR and the CR. Various CR simulations have been performed to evaluate the behaviour of the OSSE on different CR configurations and prove its robustness. The NR and CRs use different setups of MOCAGE. The CRs use IFS meteorological forcings, while the NR uses ARPEGE meteorological forcings. The use of different meteorological inputs is expected to yield differences in the transport of pollutant species, and changes in dynamic emissions of sea salt and desert dust. To introduce more differences between the CRs and NR, changes in the emissions are also introduced.

Table 4 indicates the changes made on the different model parameters to create 4 distinct CR simulations. The first control run, CR1, uses the same inputs as the NR except for the meteorological forcings. Other control runs (CR2, CR3, CR4) do not have the SOA formation process of the NR (Sect. 2) and CR1 simulations. Finally, CR3 and CR4 change from other simulations by different vertical repartitions of emissions in the five lowest levels. In CR3, the pollutants are emitted with a slower decay with height than the NR (with repartition from 30 % at surface and respectively 24 %; 19 %; 15 %; 12 % for the four levels above), and in the CR4 emissions are only injected in the lowest level. These changes aim to generate simulations that are more significantly different from the NR than the first two control runs.

The four CRs are compared to the NR for PM<sub>10</sub> and PM<sub>2.5</sub> surface concentration considering virtual observations located at the same locations as the AQeR stations. A time-series of daily means of surface concentrations at simulated stations is presented in Fig. 7, for NR and CRs simulations from the 1<sup>st</sup> January to the 30<sup>th</sup> April 2014. The PM<sub>10</sub> concentrations of the NR (in purple) are mostly greater than the PM<sub>10</sub> concentrations in the CRs. During the period of late March and early April (around the 90<sup>th</sup> day of simulation) the NR concentrations of PM<sub>10</sub> are close to those of the CR2, CR3 and CR4, and less than those of the CR1 by about few  $\mu\text{gm}^{-3}$ . In terms of PM<sub>2.5</sub>, the CRs concentrations are also underestimating the NR concentration. As for PM<sub>10</sub>, around the 90<sup>th</sup> day of simulation, the concentrations of CR1 are above the concentrations of the NR.

These tendencies can also be observed in Fig. 8, which represents a scatter plot of CRs concentrations as a function of NR concentrations for the daily means of surface concentration in PM<sub>10</sub> and PM<sub>2.5</sub> at the virtual stations. The CR1 concentrations are fairly close to those of the NR concentrations with a coefficient of regression about 0.801 and 0.835 for PM<sub>10</sub> and PM<sub>2.5</sub>. Other CRs underestimate the NR concentrations. This tendency is stronger for PM<sub>10</sub> than for PM<sub>2.5</sub>. The regression

coefficient of the CR2, CR3, CR4 are respectively 0.596, 0.583 and 0.607 for  $PM_{10}$  and 0.570, 0.505 0.647 for  $PM_{2.5}$ . For both  $PM_{10}$  and  $PM_{2.5}$  concentrations, the underestimation is more important for high values of the NR concentrations than for low values.

The statistical indicators in Tab. 5 and 6 are consistent with Fig. 7 and 8. The CR1 is close to the NR with a bias of -1.3  
5 (-8.2 %)  $\mu\text{g}\cdot\text{m}^{-3}$  for  $PM_{10}$  and -0.8 (-6.2 %)  $\mu\text{g}\cdot\text{m}^{-3}$  for  $PM_{2.5}$ . CR4 bias is around -2.9 (-20.5 %)  $\mu\text{g}\cdot\text{m}^{-3}$  for  $PM_{10}$  and -1.8 (-15.1 %)  $\mu\text{g}\cdot\text{m}^{-3}$  for  $PM_{2.5}$ . The two other CRs highly underestimate  $PM_{10}$  and  $PM_{2.5}$  concentrations with a bias of -4.5  $\mu\text{g}\cdot\text{m}^{-3}$  (-35.2 %) and -3.9  $\mu\text{g}\cdot\text{m}^{-3}$  (-37.4 %) respectively for CR2 and -4.8  $\mu\text{g}\cdot\text{m}^{-3}$  (-38.1 %) and -4.4  $\mu\text{g}\cdot\text{m}^{-3}$  (-42.6 %) for the CR3. These biases are in agreement with the literature. Prank et al. (2016) measure a bias around -5.8 for  $PM_{10}$  and -4.4  $\mu\text{g}\cdot\text{m}^{-3}$  for  $PM_{2.5}$  for the median of four CTMs against ground-based stations in winter. In Marécal et al. (2015), statistical indicators for  
10 an ensemble of seven models are presented for winter. A bias between -3 and -7  $\mu\text{g}\cdot\text{m}^{-3}$  is observed for the median ensemble. The PM concentrations of our CRs compared to the NR are characteristic of models compared to observations.

Prank et al. (2016) also show other indicators for the median of models, such as the temporal correlation and the factor of 2. Their correlations are around 0.7 for  $PM_{2.5}$  and 0.6 for  $PM_{10}$  and are close to those for our CRs simulations that vary from 0.644 to 0.732 for  $PM_{2.5}$  and from 0.572 to 0.671 for  $PM_{10}$ . Their factor of 2 equals 65 % for  $PM_{10}$  and 67 % for  $PM_{2.5}$ . The  
15 factor of 2 of the CRs ranges between 70 % and 90 % for both  $PM_{10}$  and  $PM_{2.5}$  concentrations. The RMSE of CRs simulations ranges from 8  $\mu\text{g}\cdot\text{m}^{-3}$  to 10  $\mu\text{g}\cdot\text{m}^{-3}$  for  $PM_{10}$  concentrations, which is slightly under the RMSE of the ensemble from the study of Marécal et al. (2015) which ranges between 10 and 15  $\mu\text{g}\cdot\text{m}^{-3}$ . The FGE of the study of Marécal et al. is equal to 0.55, while the FGE of CRs varies from 0.33 to 0.51. Our CRs simulations slightly underestimate the model relative error. Thus, compared to literature, the CRs (especially the CR3) are different enough from the NR to be representative of  
20 state-of-the-art simulations.,

Between the CRs and the NR there are important spatial differences in surface concentrations of PM, as demonstrated in Fig. 9, which shows the relative differences, Pearson correlation and the FGE for  $PM_{10}$ . Over the Atlantic Ocean, the CRs concentrations are relatively close to the NR, except for the CR4 which overestimates the concentration of  $PM_{10}$ . All CRs present high concentrations of  $PM_{10}$  all over North Africa. This corresponds to high emissions of desert dust over this area,  
25 which cause an important overestimation of  $PM_{10}$  compared to the NR. This overestimation can also be observed around all the Mediterranean Basin. The CRs tend to overestimate the  $PM_{10}$  concentrations over Spain, Italy, the Alps, Greece, Turkey, the north of the UK, the Iceland and the Norway. The overestimation over the Alps, Iceland and Norway are located at places of negligible concentrations. Over the rest of the European continent, CRs underestimate the concentration of  $PM_{10}$ , slightly for CR1, but very pronounced for CR2, CR3 and CR4. The area where the consistency between the CRs and the NR  
30 is better is the Atlantic Ocean with a correlation ranging from 0.6 to 0.9 and a low FGE around 0.3. Over the Mediterranean Basin the correlation varies significantly between 0 and 1. Low correlations correspond to high FGE around 1. Over the continent, the correlation varies from 0.4 to 0.9 following a west-east axis. The correlations are slightly greater for CR1 than for the other CRs. The FGE over the continent changes significantly between the CR1 and the other CRs, respectively around 0.35 and 0.55. Similar conclusions can be obtained for the  $PM_{2.5}$  comparison (see complementary materials). A



similar comparison has been done for the AOD between the CRs simulations and the NR simulation (see complementary materials).

In summary, the control runs present spatial variability along with temporal variability. The closest CR to the NR is the CR1. In terms of surface concentrations in PM, the CR3 is the most distant, while in terms of AOD the CR4 is the most distant.

5 Those differences and the use of different CRs, coupled with the realism of the NR, demonstrate the robustness of the OSSE to evaluate the added value provided by AOD derived from the FCI.

## 5 Assimilation of FCI synthetic observations

The purpose of this paper is to assess the potential contribution of FCI VIS04 channel to the assimilation of aerosols on a continental scale. In our OSSE, MOCAGE represents the atmosphere with a horizontal resolution of  $0.2^\circ$  (around 20 km at the equator). Synthetic observations are therefore computed at the model resolution although FCI scans around 1 km resolution at the equator and 2 km over Europe. To fit with the timestep of our assimilation cycle, synthetic observations are also created every hour, although the future FCI imager could retrieve radiance observations every 10 minutes over the globe, and 2.5 minutes over Europe with the European Regional-Rapid-Scan. This means that for each profile of our simulation, only one synthetic observation is available each hour, instead of  $24 \times 10 \times 10$  at best (FCI scans 24 times an hour, with a spatial resolution 10 times higher than the model over the Europe). The use of one observation for each profile in an assimilation window is due to the assimilation system design that does not allow multiple observations for a same profile. In practice, future FCI observations could be averaged over each MOCAGE profile to reduce the impact of the instrument errors on assimilated observations.

The 3D-FGAT assimilation scheme integrates the synthetic observations described in Sect. 3. Before assimilation, a thinning process is applied to the synthetic observations to keep spatially only 1 pixel out of 4. Such thinning is useful to reduce the computation time, by accelerating the convergence of the cost function (not shown). The spatial correlation length of the B background covariance matrix is set to  $0.4^\circ$  in order to have a spatial impact of the assimilation on the simulation while not having multiple coverage of assimilated observations over one profile. The result of this thinning procedure changes only slightly the assimilated fields but saves significantly computing time. Assimilation simulations (ARs) are run for all CRs simulations using the same generated set of synthetic observations over the period of 4 months, from the 1<sup>st</sup> of January to the 30<sup>th</sup> of April. The standard deviation of errors used for B and R matrix are estimated respectively at 24 % and 12 %, as in Sič et al. (2016).

To assess the impact of the assimilation of FCI synthetic AOD observations, the CR forecasts and the AR analyses are compared to the assimilated synthetic observations. Figure 10 shows the histograms of the differences between the synthetic observations and the forecast field (in blue) and between synthetic observations and analyzed fields (in purple) for the four ARs simulations. The histograms follow a Gaussian shape, and the distribution of the analyzed values are closer to the synthetic observations than the forecast values. The spread of the histograms is smaller for the analyzed fields than for the

forecast fields. The assimilation of synthetic AODs hence improved the representation of AOD fields in the assimilation simulations. Besides, the spatial comparisons between the simulations and the NR show improvements in the AOD fields of simulations by assimilation of the synthetic observations (see supplementary material Fig. S5, S6, S7 and S8). As the increment is applied to all aerosol bins and that  $PM_{10}$  corresponds to 5 of the 6 bins while  $PM_{2.5}$  to only 4, we expect better  
5 corrections for  $PM_{10}$  concentrations than for  $PM_{2.5}$  concentrations.

To validate the results of the OSSEs, the simulations are compared to the reference simulation (NR) over the period. Figure 11 exhibits the spatial differences in surface concentrations of  $PM_{10}$  between the ARs and the NR. It shows the mean relative bias, the correlation and the FGE for every simulations. Using Fig. 9 as a reference, the relative bias, the FGE and the correlation have been improved over most parts of the domain after assimilation for all simulations. Over the European  
10 continent, all simulations show a strong improvement of the statistical indicators. For instance in CR3, along a line that goes from Spain to Poland, the FGE decreases by about 0.1 after assimilation, In the Eastern part of Europe (from the Turkey to Finland), the decrease of FGE is even higher. Over North Africa and the Mediterranean Sea the improvement is intermediate. Nevertheless, the mean bias over the ocean tends to increase for the simulations, especially for AR4. This can also be observed for the  $PM_{2.5}$  concentration comparison (see supplementary material S1, S2, S3 and S4).

15 The assimilation of the synthetic observations has a positive impact at each layer of the model. The mean vertical concentrations of  $PM_{10}$  and  $PM_{2.5}$  of the different simulations are respectively represented in Fig. 12 and 13, from the surface (level 47) up to 6 km (level 30). The positive impact along the vertical of the assimilation of AOD in the CTM MOCAGE is due to the use of the vertical representation of the model to distribute the increment. Sič et al (2016) showed that the assumption of using the vertical representation of the model gives good assimilation results with the regular MOCAGE setup  
20 that distributes emissions over the 5 lowest vertical levels. However, the performance of the assimilation may depend on the realism of the representation of aerosols along the vertical in the CTM. The CRs simulations, in red, overestimate the  $PM_{10}$  concentrations of the NR, in purple, due to the overestimation of desert dust concentrations in the CRs simulations. This overestimation is not present in the  $PM_{2.5}$  concentrations because this is the fraction of aerosols where there are few desert dusts. For the first three simulations, the vertical  $PM_{10}$  concentrations are well corrected by the assimilation, while for  
25 simulation 4, the correction is less relevant for the levels near the surface. The assimilation tends to decrease the  $PM_{2.5}$  concentrations above the level 42 and to increase the concentrations under that level. Simulation 4 presents a decay of the surface concentrations of  $PM_{2.5}$ . The correction of concentrations is more pertinent for the  $PM_{10}$  concentrations than for the  $PM_{2.5}$  concentrations, which was expected.

The vertical distribution of aerosol concentrations between the CR4 simulations and the NR explains why the bias over the  
30 ocean tends to increase. At the lowest level, the concentration of  $PM_{10}$  is more important, since the CR4 emits only at the surface level, while the AOD is less important, since the aerosol loss by dry deposition increases. The positive increment is therefore added preferentially to the surface level, which increases the bias at surface.

To evaluate the capability of the FCI 444 nm channel observations to improve aerosol forecast in an air quality scenario, the ARs simulations have been compared to the NR using the synthetic AQeR stations as in Sect. 4. Tables 7 and 8 show the statistics of the comparison between the ARs and the NR for  $PM_{10}$  and  $PM_{2.5}$  concentrations. With regard of the comparison of the CRs against the NR in Tab. 5 and 6, the ARs are more consistent with the NR. The bias is reduced for both  $PM_{10}$  and  $PM_{2.5}$  concentrations. The RMSE and the FGE decrease while the Factor of 2 and the correlations increase for all ARs compared to their respective CRs.

The daily medians of  $PM_{10}$  and  $PM_{2.5}$  concentrations at all stations are represented over time in Fig. 14 and 15 for the four simulations. The assimilation reduces the gap between the simulations and the NR over the entire period. Around the secondary inorganic aerosol episode, 65<sup>th</sup> day of simulation, the improvements of  $PM_{10}$  and  $PM_{2.5}$  surface concentrations are significant for simulations 2, 3 and 4.

From an air quality monitoring perspective, the assimilation of the FCI synthetic AOD at 444 nm in MOCAGE improves strongly the surface  $PM_{10}$  concentrations in the 4 simulations over the European continent for the period January-April 2014. To quantify the improvement of simulations through the assimilation of FCI synthetic observations during a severe pollution episode for (7<sup>th</sup>-15<sup>th</sup> March) over Europe, maps of relative concentrations of  $PM_{10}$  and FGE are respectively represented for the CRs comparison and for the ARs comparison in Fig. 16 and 17. The simulations CR2, CR3 and CR4 underestimate  $PM_{10}$  concentrations for 70 % over all Europe compared to the NR. The FGE presents high values going from 0.55 to 0.85. The assimilation of synthetic AOD improves meaningfully the surface concentrations of aerosols over the continent in the simulations, but the simulations still underestimate the  $PM_{10}$  concentrations by 30-20 %. Important changes in the FGE are noticeable, with values dropping from 0.55-0.85 down to 0.2-0.4 for all simulations. Over the other areas, the assimilation reduces significantly the relative bias and the FGE. Thus, the assimilation of synthetic observations improves significantly the representation of the surface  $PM_{10}$  concentrations of simulations during the pollution episode.

In summary, the use of synthetic observations at 444 nm of the future sensor FCI through assimilation improves significantly the aerosol fields of the simulations over the European domain from January to April 2014. These improvements are located all over the domain with best results over the European continent and the Mediterranean area. The improvement of the vertical profile of aerosol concentrations is also noticeable, and it may be explained because different parts of the column can be transported by winds in different directions (Sič et al, 2016), although the AOD synthetic observations do not provide information along the vertical. The first two simulations give better results over the ocean than simulations 3 and 4, due to a closer representation of the vertical profile of the aerosol concentrations. This may show an overly optimistic aspect of the OSSE of the first two simulations. The simulations lead to sufficiently reliable results since the shapes of their vertical profile of aerosol concentrations are different from those of the NR. These differences are caused by the way emissions are injected in the atmosphere (higher for simulation 3 and lower for simulation 4). The simulations 3 and 4 present robust results over continent, despite the differences in the vertical representation of aerosol concentrations.

## 6 Discussion

Although the results have shown a general benefit of FCI/VIS04 future measurements for assimilation in the CTM MOCAGE, some limitations must be addressed. The AOD does not introduce information on the vertical distribution of PM, nor on the size distribution and type of aerosols. So, the performance of the assimilation will largely depend on the realism of the representation of aerosols in the CTM before assimilation. If, for instance, the model has a positive bias in AOD and a negative bias in surface PM<sub>10</sub> compared to observations, then the assimilation could lead to detrimental results. So the AOD and PM biases should be assessed and corrected as far as possible, before assimilation, in order to avoid detrimental assimilation.

To identify the added value of assimilating FCI/VIS04 AOD, it is needed to compare the results with the assimilation of present-day observations, such as imagers on LEO satellites and in-situ surface PM observations. The assimilation of PM surface observations is indeed an efficient way to improve PM concentration fields at surface (Tombette et al, 2009), but the correction of the fields remains confined to the lowermost levels. While improving the PM surface fields, it has been shown that the assimilation of AOD also gives a better representation of aerosols along the vertical (Fig. 12 and 13) and of the AOD fields, which are important added value that the assimilation of PM surface observations only cannot achieve. Besides, the satellite coverage is much broader than the coverage of in-situ network and, for instance, aerosol fields over the seas can be corrected before they reach the coast.

In order to assess the added-value of a high repetitivity measurements of FCI compared to a LEO satellite, a complementary experiment, called AR3LEO, has been done. This experiment is based on the CR3 configuration of MOCAGE, but the synthetic observations kept are only the ones at 12UTC, instead of the hourly observations. By taking into account only one measurement per pixel per day, AR3LEO should thus simulate the assimilation of a LEO satellite. The results of AR3LEO are in Tab. 9 and Fig. 18. The density of observations assimilated is about 10 times lower than the density of FCI assimilated data. Most of the scores (except the PM<sub>2.5</sub> correlation) of AR3LEO are between the CR3 and the AR3 scores, which shows and quantifies the benefit of FCI compared to a LEO satellite. This is confirmed also on the time series of PM<sub>10</sub> surface concentrations show (Fig. 18): the AR3LEO simulation is closer to the CR3 simulation than to the AR3 simulation. During the pollution episodes from 7 to 14 March 2014 (Fig. 18, time series between day 60 and day 67, and maps), the amplitude of PM concentrations is underestimated more in AR3LEO than in AR3. The maps of bias and FGE show better scores in AR3 than in AR3LEO at the locations where pollution occurs.

The results have shown the potential benefit of assimilating AOD data from the future FCI/VIS04 in a chemistry-transport model for monitoring the PM concentrations at regional scale over Europe. The horizontal and temporal resolution of FCI (2 km horizontal grid every 10 minutes or even 2.5 minutes in Regional Rapid Scan) will however be much finer than the regional scales that have been considered in this study: (0.2° horizontal grid every hour). The large differences between the resolution of future FCI data and the data used in this OSSE have two important implications that deserve to be presented. Firstly, in order to get closer to the future data, one could consider generating synthetic observations at the full FCI

resolution and assimilate them in a regional-scale assimilation system. The use of multiple observations using a “super-observation” approach, by spatial and temporal averaging, should reduce the instrumental errors and thus one may expect that the assimilation of real FCI data can lead to even better results than the OSSE presented here. Secondly, it is worth considering whether high-resolution FCI measurements could be assimilated in a high-resolution model for kilometre-scale monitoring of air quality. However, such work is presently limited by the present state of the art of numerical chemistry models and of their input emission data. The conclusions of some recent numerical experiments with kilometre-scale air quality models (Colette et al, 2014) are that such models are very expensive and that the emission inventories do not have a sufficient resolution. Still, the performance of such high resolution models are better than coarser resolution ones. As computing capacities keep increasing and kilometre-scale air quality models become affordable, it will be interesting to evaluate the benefit of assimilating high resolution FCI data in a kilometre-scale air quality model, even if the emission data is built with coarse assumptions. One might expect that the assimilation of FCI data could correct enough the model state to balance the deficiencies of the emission inventories. For such study, high temporal repetitivity may be also of high interest.

## 7 Conclusion

An OSSE method has been developed to quantify the added value of assimilating future MTG/FCI VIS04 AOD (444 nm) for regional-scale aerosol monitoring in Europe.. The characteristic errors of the FCI have been computed from a sensitivity analysis and introduced in the computation of synthetic observations from the NR. An evaluation of the realistic state of the atmosphere of the NR has been done, as well as a comparison of CR simulations with the NR, in order to avoid the identical twin problem mentioned in Timmermans et al. (2009a). Furthermore, different control run simulations have been set up as in Claeys et al. (2011) to avoid this issue. The results of the OSSE should hence be representative of the results that the assimilation of real retrieved AODs from the FCI sensor will bring.

Although the use of a single synthetic observation per profile and the choice of an albedo error of 10% are pessimistic choices, the assimilation of synthetic AOD at 444 nm showed a positive impact, particularly for the European continental air pollution. The simulations with data assimilation reproduced spatial and temporal patterns of  $PM_{10}$  concentrations at surface better than without assimilation all along the simulations and especially during the high pollution event of March. The improvement of analysed fields is also expected for other strong pollution event such as a volcanic ash plume. This capability of synthetic observations to improve the analysis of aerosols is present for the 4 set of simulations which show the capability of future data from the FCI sensor to bring an added value within the CTM MOCAGE aerosol forecasts, and in general, in atmospheric composition models. Moreover, the advantage of a GEO platform over a LEO satellite has been shown and assessed.

The results over ocean show an increase of PM concentration bias after assimilation in some places, particularly for AR4. An explanation is that AOD does not introduce information vertically and that the correction of aerosols in the vertical relies on

the model vertical distribution. For a satisfactory assimilation of AOD, the AOD and PM biases of the model should be assessed and corrected as far as possible. Another perspective is to use multiple wavelengths, using the Ångström exponent, could avoid this problem by better distributing the increment of AOD between the different bins and hence the different species. Sič et al. (2016) also recommended the use of other types of observations, such as lidars, in the assimilation process to introduce information over the vertical.

The results presented here in this OSSE are encouraging for the use of future FCI AOD data within CTMs for the wavelength VIS04 centered at 444 nm. The use of other channels could bring complementary information, such as the NIR2.2 that is expected to be less sensitive to fine aerosols but more sensitive to large aerosols such as desert dusts and sea salt aerosols. Future work may also consider exploiting the high-resolution of FCI, following two possible lines: either for regional-scale assimilation by using a “super-observation” procedure, or for kilometre-scale air quality mapping and for assessing the quality of emission inventories. However, such extension is mostly depending on improvements in the numerical chemistry models, in the input emission data and in the optimization of assimilation algorithms.

### Acknowledgements

We acknowledge that the MTG satellites are being developed under an European Space Agency contract to Thales Alenia Space. We thank both reviewers for their constructive and insightful comments.

### Appendix: Deriving AOD error variance from the Global Sensitivity Analysis of FCI/VIS04 reflectance

The general method is summarized in Figure A1. A sensitivity analysis has been performed for each OPAC aerosol types, using Monte-Carlo FCI simulations of about 200.000 draws in the prior distribution of the input parameters. The input distribution of AOD and of total ozone and water vapor columns are obtained from a MOCAGE simulation ran over the whole 2013 year. The distribution of ground albedo is deduced from the OPAC database. The profiles of the MOCAGE simulation are classified into OPAC (Hess et al., 1998) types by making correspondence between species as Ceamanos et al. (2014) and then by applying classification criteria similar to the OPAC types.

For every OPAC type, a global sensitivity analysis (GSA) has been performed between the input (AOD  $\tau$ , total column water vapour, ozone content), ground albedo  $\rho_g$  and solar zenithal angle  $\theta_s$ ) distributions and the output (VIS04 reflectance) distributions of the FCI simulator. Under the assumption of independent inputs, the Sobol (1990, 1993) indices enable a ranking of inputs or couple of inputs with respect their variance-based importance in the total output variance. For VIS04, the variability of the solar zenithal angle, the ground albedo and the AOD are the three largest Sobol indices in that order and, together, they are at the origin of more than 98 % of the total variance of the output reflectance. Following Sobol (1996), the GSA can also be used to determine a truncated version of the Hoeffding (1948, ANOVA) functional decomposition, with key inputs, that approximates the analyzed reflectance. For all OPAC groups, the dependence of

reflectance for VIS04 on the total ozone column and water vapor is negligible and is not taken into account in the reflectance approximation. As a consequence, the reflectance  $R$  can be approximated by the following equation:

$$R = f_3(\theta_s) + f_2(\rho_g) + f_1(\tau) + \epsilon, \quad (2)$$

where  $f_1$ ,  $f_2$ , and  $f_3$  are functions of the solar zenithal angle, the ground albedo and the AOD, respectively. The approximation error  $\epsilon$ , exhibits a root mean square (RMS) less than  $0.7 \text{ W m}^{-2} \text{ sr}^{-1} \mu\text{m}^{-1}$  (1.5 % of the mean radiance values of  $47.3 \text{ W m}^{-2} \text{ sr}^{-1} \mu\text{m}^{-1}$ ).

As a consequence of this sensitivity analysis, it is then possible to isolate the AOD  $\tau$  with respect the measured reflectance  $R$ , the other key inputs  $\theta_s$ ,  $\rho_g$  and the approximation error  $\epsilon$ :

$$\tau = F(R, \theta_s, \rho_g, \epsilon). \quad (3)$$

By sampling input distributions on this equation (Monte-Carlo method), the root mean square error (RMSE) of the AOD retrieval can be derived as a function of the reflectance  $R$ , the solar zenithal angle  $\theta_s$  the ground albedo  $\rho_g$ , and of their uncertainty.  $R$  is associated with a measurement noise. No uncertainty is prescribed for the solar zenithal angle. For a given fixed value of relative error of ground albedo, a look-up-table is built, that provides the root mean square error (RMSE) of the AOD retrieval as a function of the solar zenithal angle and of the ground albedo. Such a look-up-table of the RMSE of VIS04 AOD has been computed for every OPAC types and for different possible values of surface albedo errors.

## References

- Alfaro, S. C., Gaudichet, A., Gomes, L., and Maillé, M.: Mineral aerosol production by wind erosion: aerosol particle sizes and binding energies, *Geophys. Res. Lett.*, 25, 991–994, 1998.
- Aoun, Y.: Evaluation de la sensibilité de l'instrument FCI à bord du nouveau satellite Meteosat Troisième Génération imageur (MTG-I) aux variations de la quantité d'aérosols d'origine désertique dans l'atmosphère. Thèse de Doctorat PSL Research University, 2016.
- Aoun, Y., Blanc, P., Wald, L., Mathieu, S., and Claeys, M.: The use of global sensitivity analysis for assessing capability of the MTG/FCI instrument to detect aerosols. In *Proceedings of the 2015 EUMETSAT Meteorological Satellite Conference*, Toulouse, France, 21-25 Sep 2015.
- [http://www.eumetsat.int/website/home/News/ConferencesandEvents/DAT\\_2305526.html](http://www.eumetsat.int/website/home/News/ConferencesandEvents/DAT_2305526.html) (session 3), Aoun.pdf, 2015.
- Bäumer, D., Vogel, B., Versick, S., Rinke, R., Möhler, O., and Schnaiter, M.: Relationship of visibility, aerosol optical thickness and aerosol size distribution in an ageing air mass over South-West Germany, *Atmos. Environ.*, 42, 989–998, 2008.
- Bechtold, P., Bazile, E., Guichard, F., Mascart, P., and Richard, E.: A mass-flux convection scheme for regional and global models, *Q. J. Roy. Meteor. Soc.*, 127, 869–886, 2001.

- Benedetti, A., Morcrette, J.-J., Boucher, O., Dethof, A., Engelen, R., Fisher, M., Flentje, H., Huneeus, N., Jones, L., Kaiser, J., et al.: Aerosol analysis and forecast in the European centre for medium-range weather forecasts integrated forecast system: 2. Data assimilation, *J. Geophys. Res. - Atmos.*, 114, 2009.
- Bernard, E., Moulin, C., Ramon, D., Jolivet, D., Riedi, J., and Nicolas, J.-M.: Description and validation of an AOT product over land at the 0.6 [ $\mu$ ] m channel of the SEVIRI sensor onboard MSG, *Atmos. Meas. Tech.*, 4, 2543, 2011.
- Brook, R. D., Franklin, B., Cascio, W., Hong, Y., Howard, G., Lipsett, M., Luepker, R., Mittleman, M., Samet, J., Smith, S. C., et al.: Air pollution and cardiovascular disease, *Circulation*, 109, 2655–2671, 2004.
- Carrer, D., Roujean, J.-L., Hautecoeur, O., and Elias, T.: Daily estimates of aerosol optical thickness over land surface based on a directional and temporal analysis of SEVIRI MSG visible observations, *J. Geophys. Res. - Atmos.*, 115, 2010.
- Castro, L., Pio, C., Harrison, R. M., and Smith, D.: Carbonaceous aerosol in urban and rural European atmospheres: estimation of secondary organic carbon concentrations, *Atmos. Environ.*, 33, 2771–2781, 1999.
- Ceamanos, X., Carrer, D. and Roujean, J.L.: Improved retrieval of direct and diffuse downwelling surface shortwave flux in cloudless atmosphere using dynamic estimates of aerosol content and type: Application to the LSA-SAF project. *Atmos. Chem. Phys.*, 15, 8209-8232, 2014.
- Claeyman, M., Attié, J.-L., Peuch, V.-H., El Amraoui, L., Lahoz, W. A., Josse, B., Joly, M., Barré, J., Ricaud, P., Massart, S., et al.: A thermal infrared instrument onboard a geostationary platform for CO and O<sub>3</sub> measurements in the lowermost troposphere: Observing System Simulation Experiments (OSSE), *Atmos. Meas. Tech.*, 4, 1637, 2011.
- Colette, A., B. Bessagnet, F. Meleux, E. Terrenoire, and L. Rouil.: *Frontiers in air quality modelling*. *Geosci. Model Dev.*, 7, 203-210, 2014.
- Curci, G., C. Hogrefe, R. Bianconi, U. Im, A. Balzani, R. Baro, D. Brunner, R. Forkel, L. Giordano, M. Hirtl: Uncertainties of simulated optical properties induced by assumption on aerosol physical and chemical properties: an AQMEII-2 perspective, *Atmos. Environ.*, 115, 541-552, 2015.
- Dufour, A., Amodei, M., Ancellet, G., and Peuch, V.-H.: Observed and modelled “chemical weather” during ESCOMPTE, *Atmos. Res.*, 74, 161–189, 2005.
- EEA: Air quality in Europe — 2014 report, <https://www.eea.europa.eu/publications/air-quality-in-europe-2014/>.
- Edwards, D. P., A. F. Arellano Jr., M. N., and M. N. Deter, A satellite observation system simulation experiment for carbon monoxide in the lowermost atmosphere, *J. Geophys. Res.*, 114, D14304, 2009.
- Eskes, H., Huijnen, V., Arola, A., Benedictow, A., Blechschmidt, A., Botek, E., Boucher, O., Bouarar, I., Chabrillat, S., Cuevas, E., et al.: Validation of reactive gases and aerosols in the MACC global analysis and forecast system, *Geosci. Model. Dev.*, 8, 3523, 2015.
- Eumetsat: URD Eumetsat,  
[http://www.eumetsat.int/website/wcm/idc/idcplg?IdcService=GET\\_FILE&dDocName=pdf\\_mtg\\_eurd&RevisionSelectionMethod=LatestReleased&Rendition=Web](http://www.eumetsat.int/website/wcm/idc/idcplg?IdcService=GET_FILE&dDocName=pdf_mtg_eurd&RevisionSelectionMethod=LatestReleased&Rendition=Web), 2010.



- Fountoukis, C. and Nenes, A.: ISORROPIA II: a computationally efficient thermodynamic equilibrium model for  $K^+$ - $Ca^{2+}$ - $Mg^{2+}$ - $NH_4^+$ - $Na^+$ - $SO_4^{2-}$ - $NO_3^-$ - $Cl^-$ - $H_2O$  aerosols, *Atmos. Chem. and Phys.*, 7, 4639–4659, 2007.
- Gerber, H. E.: Relative-humidity parameterization of the Navy Aerosol Model (NAM), Tech. rep., NAVAL RESEARCH LAB WASHINGTON DC, 1985.
- 5 Gong, S.: A parameterization of sea-salt aerosol source function for sub-and super-micron particles, *Global Biogeochem. Cy.*, 17, 2003.
- Granier, C., Bessagnet, B., Bond, T., D’Angiola, A., van Der Gon, H. D., Frost, G. J., Heil, A., Kaiser, J. W., Kinne, S., Klimont, Z., et al.: Evolution of anthropogenic and biomass burning emissions of air pollutants at global and regional scales during the 1980–2010 period, *Climatic Change*, 109, 163, 2011.
- 10 Guffanti, M., Casadevall, T. J., and Budding, K. E.: Encounters of aircraft with volcanic ash clouds: a compilation of known incidents, 1953-2009, US Department of Interior, US Geological Survey, 2010.
- Guth, J., Josse, B., Marécal, V., Joly, M., and Hamer, P. D.: First implementation of secondary inorganic aerosols in the MOCAGE version R2. 15.0 chemistry transport model, *Geosci. Model. Dev.*, 9, 137-160, 2016.
- Hess, M., Koepke, P., and Schult, I.: Optical properties of aerosols and clouds: The software package OPAC, *B. Am. Meteorol. Soc.*, 79, 831–844, 1998.
- 15 Hoeffding, W.: A class of statistics with asymptotically normal distribution, *Ann. Math. Stat.*, pp. 293–325, 1948.
- Holben, B. N., Eck, T., Slutsker, I., Tanre, D., Buis, J., Setzer, A., Vermote, E., Reagan, J., Kaufman, Y., Nakajima, T., et al.: AERONET—A federated instrument network and data archive for aerosol characterization, *Remote Sens. Environ.*, 66, 1–16, 1998.
- 20 Im, U., Bianconi, R., Solazzo, E., Kioutsioukis, I., Badia, A., Balzarini, A., Baró, R., Bellasio, R., Brunner, D., Chemel, C., et al.: Evaluation of operational on-line-coupled regional air quality models over Europe and North America in the context of AQMEII phase 2. Part I: Ozone, *Atmos. Environ.*, 115, 404–420, 2015.
- Jaeglé, L., Quinn, P., Bates, T., Alexander, B., and Lin, J.-T.: Global distribution of sea salt aerosols: new constraints from in situ and remote sensing observations, *Atmos. Chem. Phys.*, 11, 3137–3157, 2011.
- 25 Joly, M. and Peuch, V.-H.: Objective classification of air quality monitoring sites over Europe, *Atmos. Environ.*, 47, 111–123, 2012.
- Josse, B.: Représentation des processus de transport et de lessivage pour la modélisation de la composition chimique de l’atmosphère à l’échelle planétaire, Ph.D. thesis, Toulouse 3, 2004.
- Kaiser, J., Heil, A., Andreae, M., Benedetti, A., Chubarova, N., Jones, L., Morcrette, J.-J., Razinger, M., Schultz, M., Suttie,
- 30 M., et al.: Biomass burning emissions estimated with a global fire assimilation system based on observed fire radiative power, *Biogeosciences*, 9, 527, 2012.
- Kirchstetter, T. W., Novakov, T., and Hobbs, P. V.: Evidence that the spectral dependence of light absorption by aerosols is affected by organic carbon, *J. Geophys. Res. - Atmos.*, 109, 2004.
- Koepke, P., Hess, M., Schult, I., and Shettle, E.: Global aerosol data set, *MPI Meteorologie Hamburg Rep*, 243, 44, 1997.

- Kuenen, J., Visschedijk, A., Jozwicka, M., and Denier Van Der Gon, H.: TNO-MACC\_II emission inventory; a multi-year (2003–2009) consistent high-resolution European emission inventory for air quality modelling, *Atmos. Chem. Phys.*, 14, 10 963–10 976, 2014.
- IPCC: Climate change 2007-the physical science basis: Working group I contribution to the fourth assessment report of the  
5 IPCC, vol. 4, Cambridge University Press, 2007.
- Lahoz, W. A., V.-H. Peuch, J. Orphal, J.-L. Attié, K. Chance, X. Liu, D. Edwards, H. Elbern, J.-M. Flaud, M. Claeysman, L. El Amraoui, Monitoring air quality from space: the case of geostationary platform, *Bull. Am. Meteorol. Soc.*, 93, 221-233, 2012.
- Lamarque, J.-F., Bond, T. C., Eyring, V., Granier, C., Heil, A., Klimont, Z., Lee, D., Liousse, C., Mieville, A., Owen, B., et  
10 al.: Historical (1850–2000) gridded anthropogenic and biomass burning emissions of reactive gases and aerosols: methodology and application, *Atmos. Chem. Phys.*, 10, 7017–7039, 2010.
- Levy, R., Mattoo, S., Munchak, L., Remer, L., Sayer, A., Patadia, F., and Hsu, N.: The Collection 6 MODIS aerosol products over land and ocean, *Atmos. Meas. Tech.*, 6, 2989, 2013.
- Louis, J.-F.: A parametric model of vertical eddy fluxes in the atmosphere, *Bound-Lay. Meteorol.* 17, 187–202, 1979.
- 15 Marécal, V., Peuch, V.-H., Andersson, C., Andersson, S., Arteta, J., Beekmann, M., Benedictow, A., Bergström, R., Bessagnet, B., Cansado, A., et al.: A regional air quality forecasting system over Europe: the MACC-II daily ensemble production, *Geosci. Model Dev.*, 8, 2777, 2015.
- Martet, M., Peuch, V.-H., Laurent, B., Marticorena, B., and Bergametti, G.: Evaluation of long-range transport and deposition of desert dust with the CTM MOCAGE, *Tellus B*, 61, 449–463, 2009.
- 20 Marticorena, B. and Bergametti, G.: Modeling the atmospheric dust cycle: 1. Design of a soil-derived dust emission scheme, *Journal of Geophysical Research: Atmospheres*, 100, 16 415–16 430, 1995.
- Massart, S., Clerbaux, C., Cariolle, D., Piacentini, A., Turquety, S., and Hadji-Lazaro, J.: First steps towards the assimilation of IASI ozone data into the MOCAGE-PALM system, *Atmos. Chem. Phys.*, 9, 5073–5091, 2009.
- Masutani, M., T. W. Schlatter, R. M. Errico, A. Stoffelen, E. Andersson, W. Lahoz, J. S. Woollen, G. D. Emmitt, L.-P.  
25 Riishøjgaard, and S. J. Lord: Observing system simulation experiments, *Data Assimilation*, 647-679, 2010.
- Mayer, B. and Kylling, A.: The libRadtran software package for radiative transfer calculations-description and examples of use, *Atmospheric Chemistry and Physics*, 5, 1855–1877, 2005.
- Mei, L., Xue, Y., Leeuw, G. d., Holzer-Popp, T., Guang, J., Li, Y., Yang, L., Xu, H., Xu, X., Li, C., et al.: Retrieval of  
30 aerosol optical depth over land based on a time series technique using MSG/SEVIRI data, *Atmos. Chem. Phys.*, 12, 9167–9185, 2012.
- Petty, G. W.: A first course in atmospheric radiation, Sundog Pub, 2006.
- Peuch, V.-H., and R. Engelen: Towards and operational GMES Atmosphere Monitoring Service, *ECMWF Newsletter*, 132, 20–25, 2012.

- Prank, M., Sofiev, M., Tsyro, S., Hendriks, C., Semeena, V., Vazhappilly Francis, X., Butler, T., Denier van der Gon, H., Friedrich, R., Hendricks, J., et al.: Evaluation of the performance of four chemical transport models in predicting the aerosol chemical composition in Europe in 2005, *Atmos. Chem. Phys.*, 16, 6041–6070, 2016.
- Rouil, L., Honore, C., Bessagnet, B., Malherbe, L., Meleux, F., Vautard, R., Beekmann, M., Flaud, J.-M., Dufour, A., Martin, D., et al.: PREV’AIR: an operational forecasting and mapping system for air quality in Europe, *B. Am. Meteorol. Soc.*, 90, 73–83, 2009.
- Seinfeld J.H. and Pandis S.N.: *Atmospheric Chemistry and Physics*, 1326 pp. John Wiley, Hoboken, NJ, 1998.
- Sič, B., El Amraoui, L., Marécal, V., Josse, B., Arteta, J., Guth, J., and Hamer, P. D.: Modelling of primary aerosols in the chemical transport model MOCAGE: development and evaluation of aerosol physical parameterizations. *Geosci. Model Dev.*, 8, 381, 2015.
- Sič, B., Amraoui, L. E., Piacentini, A., Marécal, V., Emili, E., Cariolle, D., Prather, M., and Attié, J.-L.: Aerosol data assimilation in the chemical transport model MOCAGE during the TRAQA/ChArMEx campaign: aerosol optical depth, *Atmos. Meas. Tech.*, 9, 5535–5554, 2016.
- Sobol, I. M.: On sensitivity estimation for nonlinear mathematical models, *Matematicheskoe modelirovanie*, 2, 112–118, 1990.
- Sobol, I. M.: Sensitivity estimates for nonlinear mathematical models, *Mathematical modelling and computational experiments*, 1, 407–414, 1993.
- Sobol, I. M.: On freezing of unessential variables, *Moscow University Mathematics Bulletin*, 51, 60–62, 1996.
- Stocker, T.: *Climate change 2013: the physical science basis: Working Group I contribution to the Fifth assessment report of the Intergovernmental Panel on Climate Change*, Cambridge University Press, 2014.
- Timmermans, R. M., Schaap, M., Builtjes, P., Elbern, H., Siddans, R., Tjemkes, S., and Vautard, R.: An observing system simulation experiment (OSSE) for aerosol optical depth from satellites, *Journal of Atmospheric and Oceanic Technology*, 26, 2673–2682, 2009a.
- Timmermans, R. M., A. J. Segers, P. J. Builtjes, R. Vautard, R. Siddans, H. Elbern, S. A. Tjemkes, M. Schaap, The added value of a proposed satellite imager for ground level particulate matter analyses and forecasts, *IEEE-JSTARS. J. Sel. Top. Appl. Earth Obs. Remote Sens.*, 271-283, 2009b.
- Timmermans, R. M., Lahoz, W. A., Attié, J. L., Peuch, V. H., Curier, R. L., Edwards, D. P., ... & Builtjes, P. J. H.: Observing system simulation experiments for air quality, *Atmos. Environ.*, 115, 199-213, 2015.
- Tombette, M., V. Mallet, and B. Sportisse: PM10 data assimilation over Europe with the optimal interpolation method, *Atmos. Phys. Chem*, 9, 57-70, 2009.
- van der Werf, G. R., Randerson, J. T., Giglio, L., Collatz, G. J., Kasibhatla, P. S., and Arellano Jr, A. F.: Interannual variability in global biomass burning emissions from 1997 to 2004, *Atmos. Chem. Phys.*, 6, 3423–3441, 2006.
- Vidot, J. and Borbás, É: Land surface VIS/NIR BRDF atlas for RTTOV-11: model and validation against SEVIRI land SAF albedo product, *Q. J. Roy. Meteorol. Soc.*, 140, 2186–2196, 2014.

- Vieno, M., Heal, M., Twigg, M., MacKenzie, I., Braban, C., Lingard, J., Ritchie, S., Beck, R., Móríng, A., Ots, R., et al.: The UK particulate matter air pollution episode of March–April 2014: more than Saharan dust, *Environ. Res. Lett.*, 11, 044 004, 2016.
- Williamson, D. L. and Rasch, P. J.: Two-dimensional semi-Lagrangian transport with shape-preserving interpolation, *Mon. Wea. Rev.*, 117, 102–129, 1989.
- Wiscombe, W. J.: Mie scattering calculations: advances in technique and fast, vector-speed computer codes, Atmospheric Analysis and Prediction Division, National Center for Atmospheric Research Boulder, CO, 1979, revised 1996.
- Wiscombe, W. J.: Improved Mie scattering algorithms, *Applied optics*, 19, 1505–1509, 1980.
- Yumimoto, K., Nagao, T., Kikuchi, M., Sekiyama, T., Murakami, H., Tanaka, T., Ogi, A., Irie, H., Khatri, P., Okumura, H., et al.: Aerosol data assimilation using data from Himawari-8, a next-generation geostationary meteorological satellite, *Geophys. Res. Lett.*, 43, 5886–5894, 2016.
- Zoogman, P., D. J. Jacob, K. Chance, H. M. Worden, D. P. Edwards, L. Zhang, Improved monitoring of surface ozone by joint assimilation of geostationary satellite observations of ozone and CO, *Atmos. Environ.*, 84, 254-261, 2014.

**Tables :**

|                        | Bias ( $\mu\text{g}/\text{m}^3$ ) | RMSE ( $\mu\text{g}/\text{m}^3$ ) | FGE   | FactOf2 | $R_p$ | $R_s$ |
|------------------------|-----------------------------------|-----------------------------------|-------|---------|-------|-------|
| NR's $\text{PM}_{10}$  | - 6.23<br>(~ - 35.1 %)            | 16.2                              | 0.56  | 64.7 %  | 0.452 | 0.537 |
| NR's $\text{PM}_{2.5}$ | - 3.20<br>(~ - 24.7 %)            | 11.9                              | 0.543 | 67.5 %  | 0.535 | 0.602 |

5 **Table 1: Bias, RMSE, FGE, Factor of 2, Pearson correlation ( $R_p$ ) and Spearman correlation ( $R_s$ ) of the NR simulation taking as reference the AQeR observations for hourly  $\text{PM}_{10}$  and  $\text{PM}_{2.5}$  concentrations from January to April 2014.**

|    | Bias  | MNMB | RMSE | FGE   | $R_p$ |
|----|-------|------|------|-------|-------|
| NR | 0.043 | 0.39 | 0.09 | 0.531 | 0.56  |

**Table 2: Bias, MNMB, RMSE, FGE and Pearson correlation ( $R_p$ ) between the NR simulation and AERONET station for daily 500 nm AOD from January to April 2014.**

| Aerosol types | Surface Concentration in $\mu\text{g}/\text{m}^3$ | Main species | Surface proportion over the total $\text{PM}_{10}$ |
|---------------|---------------------------------------------------|--------------|----------------------------------------------------|
| DO. & DC.     | -                                                 | DD           |                                                    |
| MC.           | -                                                 | SS           | SS > 85 %                                          |
| MPO.          | -                                                 | SS           | SS < 85 %                                          |
| MPC.          | -                                                 | SS           | SS < 85 %                                          |
| CC.           | 0 – 17                                            | IWS          |                                                    |
| CA.           | 17 – 34                                           | IWS          |                                                    |
| CP.           | 34 – 75                                           | IWS          |                                                    |
| U.            | > 75                                              | IWS          |                                                    |

5 **Table 3: Conditions for classifying the MOCAGE NR into the OPAC types. The first condition is the surface concentrations, the second is the main specie at the surface between Desert Dust (DD), Sea Salts (SS) and IWS (Insoluble, Water soluble, and Soot) and the third is a condition of the species over all the aerosols concentration. A species is described as a main species if its concentrations is above each other concentrations, for example DD is a main species if  $[\text{DD}] > [\text{SS}]$  &  $[\text{DD}] > [\text{IWS}]$ .**

|     | Forecasts | SOA | Repartition of emissions from level 1 (surface layer) up to the 5th level |
|-----|-----------|-----|---------------------------------------------------------------------------|
| NR  | ARPEGE    | Yes | 52%; 26%; 13%; 6%; 3%                                                     |
| CR1 | IFS       | Yes | 52%; 26%; 13%; 6%; 3%                                                     |
| CR2 | IFS       | No  | 52%; 26%; 13%; 6%; 3%                                                     |
| CR3 | IFS       | No  | 30%; 24%; 19%; 15%; 12%                                                   |
| CR4 | IFS       | No  | 100%; 0%; 0%; 0%; 0%                                                      |

**Table 4: Table of differences between the NR simulation and the CRs simulations.**

| Hourly PM10<br>CRs<br>« stations » vs<br>NR « stations » | Bias (µg/m3)   | RMSE (µg/m3) | FGE   | FactOf2 | R <sub>p</sub> | R <sub>s</sub> |
|----------------------------------------------------------|----------------|--------------|-------|---------|----------------|----------------|
| CR1                                                      | -1.3 (-8.2 %)  | 7.9          | 0.332 | 89.1 %  | 0.671          | 0.748          |
| CR2                                                      | -4.5 (-35.2 %) | 9.3          | 0.47  | 75.6 %  | 0.609          | 0.709          |
| CR3                                                      | -4.8 (-38.1 %) | 9.8          | 0.511 | 69.3 %  | 0.572          | 0.671          |
| CR4                                                      | -2.9 (-20.5%)  | 8.7          | 0.412 | 81.9 %  | 0.623          | 0.712          |

**Table 5: Bias, RMSE, FGE, Factor of 2, Pearson correlation (R<sub>p</sub>) and Spearman correlation (R<sub>s</sub>) of the CRs simulation taking as reference the NR simulations for hourly PM<sub>10</sub> concentrations from January to April 2014. The comparison is made at the same station location as for AQeR stations.**

5

| Hourly PM2.5<br>CRs<br>« stations » vs<br>NR « stations » | Bias (µg/m3)  | RMSE (µg/m3) | FGE   | FactOf2 | R <sub>p</sub> | R <sub>s</sub> |
|-----------------------------------------------------------|---------------|--------------|-------|---------|----------------|----------------|
| CR1                                                       | -0.8(-6.24%)  | 5.9          | 0.307 | 91.1 %  | 0.732          | 0.776          |
| CR2                                                       | -3.9 (-37.4%) | 7.1          | 0.452 | 78.4 %  | 0.69           | 0.731          |
| CR3                                                       | -4.4 (-42.6%) | 7.6          | 0.505 | 70.6 %  | 0.644          | 0.695          |
| CR4                                                       | -1.8 (-15.1%) | 6.6          | 0.374 | 85.5 %  | 0.665          | 0.73           |

**Table 6: Bias, RMSE, FGE, Factor of 2, Pearson correlation (R<sub>p</sub>) and Spearman correlation (R<sub>s</sub>) of the CRs simulation taking as reference the NR simulations for hourly PM<sub>2.5</sub> concentrations from January to April 2014. The comparison is made at the same station location as for AQeR stations.**

10

| Hourly PM10<br>CRs<br>« stations » vs<br>NR « stations » | Bias ( $\mu\text{g}/\text{m}^3$ ) | RMSE ( $\mu\text{g}/\text{m}^3$ ) | FGE   | FactOf2 | R <sub>p</sub> | R <sub>s</sub> |
|----------------------------------------------------------|-----------------------------------|-----------------------------------|-------|---------|----------------|----------------|
| AR1                                                      | -1.17 (-7.21 %)                   | 7.16                              | 0.296 | 92.2 %  | 0.739          | 0.791          |
| AR2                                                      | -2.91 (-21.3 %)                   | 8.1                               | 0.373 | 85.3 %  | 0.694          | 0.751          |
| AR3                                                      | -3.53 (-26.2 %)                   | 8.67                              | 0.417 | 80.4 %  | 0.67           | 0.726          |
| AR4                                                      | -0.756 (-<br>5.31 %)              | 8.03                              | 0.339 | 88.2 %  | 0.691          | 0.759          |

**Table 7: Bias, RMSE, FGE, Factor of 2, Pearson correlation and Spearman correlation of the ARs simulation taking as reference the NR simulations for hourly PM<sub>10</sub> concentrations from January to April 2014. The comparison is made at the same station location as for AQeR stations.**

| Hourly PM2.5<br>ARs<br>« stations » vs<br>NR « stations » | Bias ( $\mu\text{g}/\text{m}^3$ ) | RMSE ( $\mu\text{g}/\text{m}^3$ ) | FGE   | FactOf2 | R <sub>p</sub> | R <sub>s</sub> |
|-----------------------------------------------------------|-----------------------------------|-----------------------------------|-------|---------|----------------|----------------|
| AR1                                                       | -0.395 (-<br>3.15%)               | 5.61                              | 0.284 | 92.7 %  | 0.755          | 0.806          |
| AR2                                                       | -2.28 (-20.5 %)                   | 6.31                              | 0.364 | 86.6 %  | 0.703          | 0.766          |
| AR3                                                       | -2.94 (-27.1 %)                   | 6.86                              | 0.416 | 80.9 %  | 0.669          | 0.732          |
| AR4                                                       | 0.109 (0.9 %)                     | 6.56                              | 0.328 | 89.4 %  | 0.699          | 0.765          |

**Table 8: Bias, RMSE, FGE, Factor of 2, Pearson correlation and Spearman correlation of the ARs simulation taking as reference the NR simulations for hourly PM<sub>2.5</sub> concentrations from January to April 2014. The comparison is made at the same station location as for AQeR stations.**

5

10



| Hourly AR3LEO « stations » vs NR « stations » | Bias ( $\mu\text{g}/\text{m}^3$ ) | RMSE ( $\mu\text{g}/\text{m}^3$ ) | FGE   | FactOf2 | R <sub>P</sub> | R <sub>S</sub> |
|-----------------------------------------------|-----------------------------------|-----------------------------------|-------|---------|----------------|----------------|
| PM10                                          | -4.47 (-35.1 %)                   | 9.11                              | 0.462 | 75.6 %  | 0.656          | 0.717          |
| PM2.5                                         | -3.89 (-37 %)                     | 7.14                              | 0.457 | 76.5 %  | 0.681          | 0.731          |

**Table 9:** Bias, RMSE, FGE, Factor of 2, Pearson correlation and Spearman correlation of the AR3LEO simulation taking as reference the NR simulations for hourly PM10 and PM<sub>2.5</sub> concentrations from January to April 2014. The comparison is made at the same station location as for AQeR stations.

Figures :

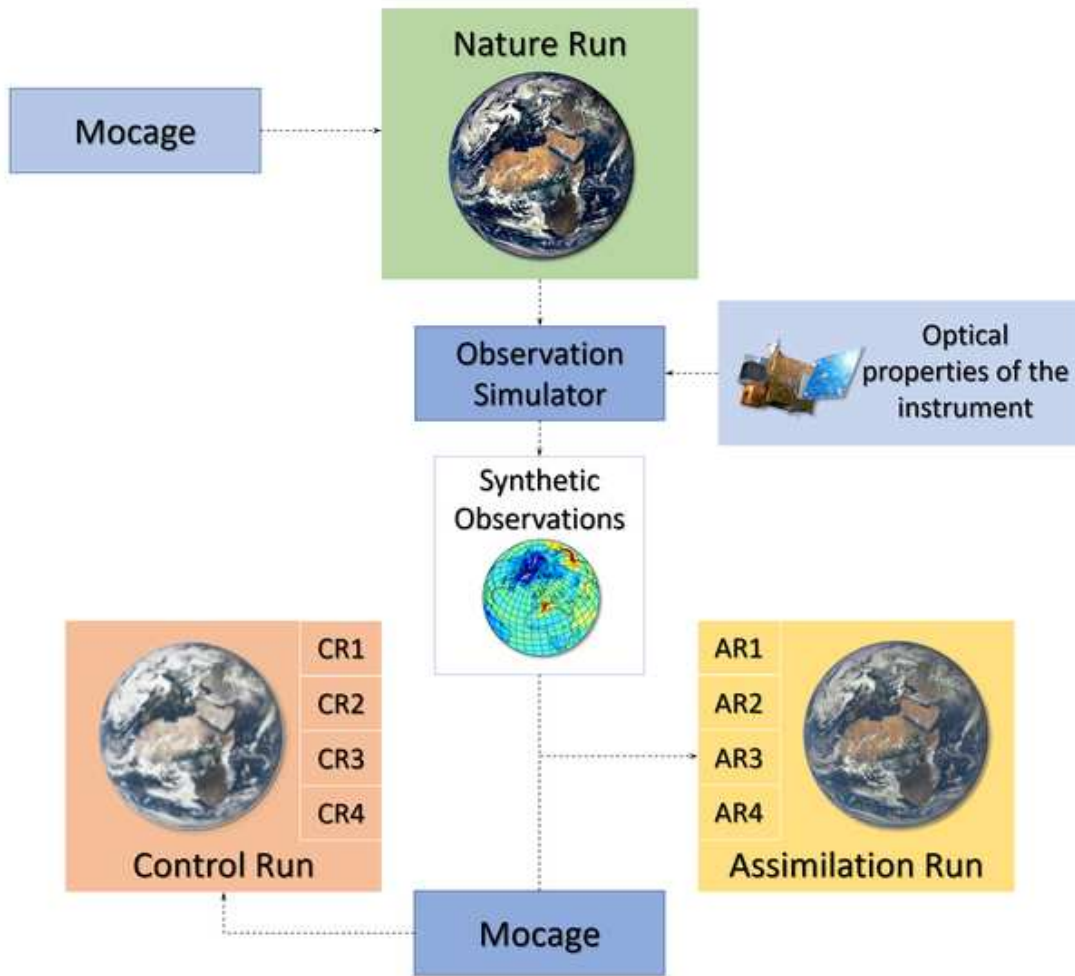

5 Figure 1: Schematic representation of the OSSE principle.

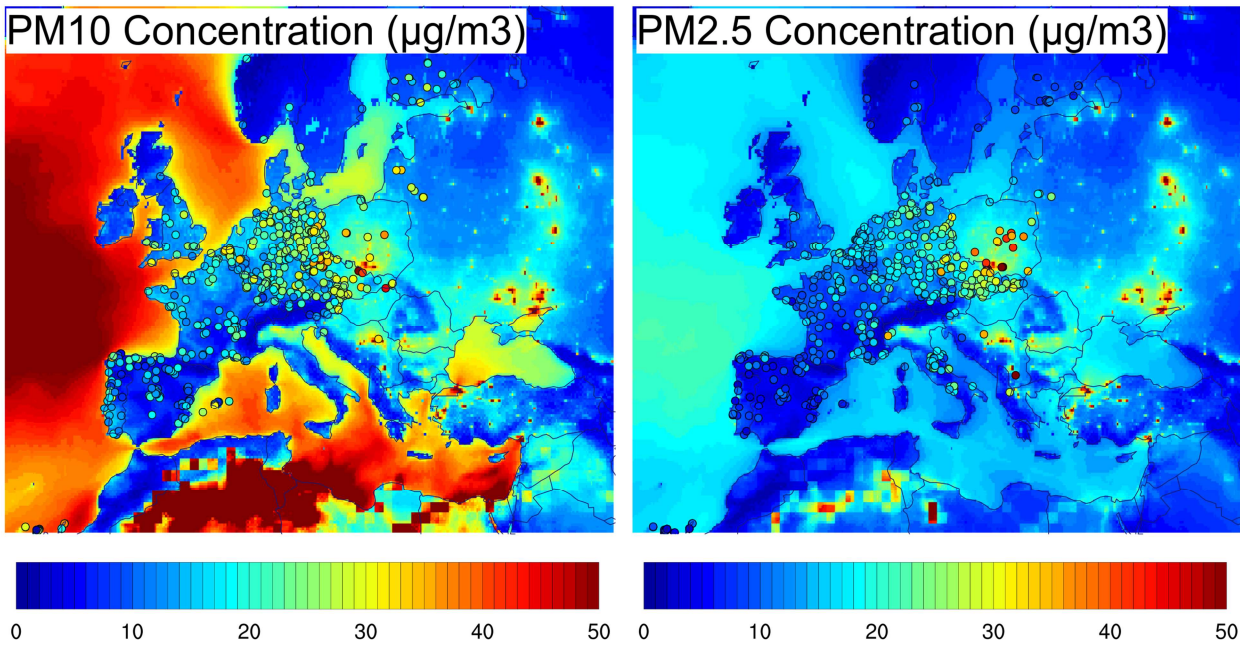

Figure 2: Mean PM<sub>10</sub> (left panel) and PM<sub>2.5</sub> (right panel) surface concentration ( $\mu\text{g}\cdot\text{m}^{-3}$ ) of the NR (shadings) and AQeR stations (color circles), from January to April 2014.

5

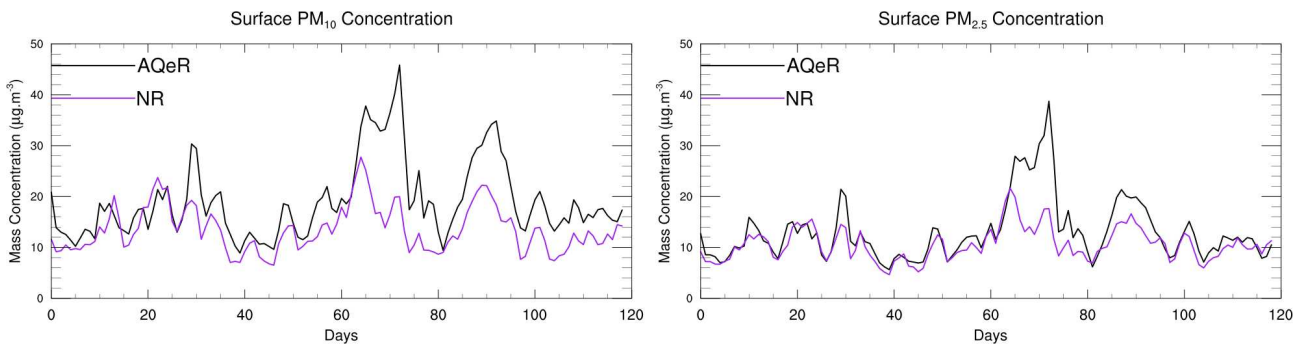

Figure 3: Median of the daily mean surface concentration in  $\mu\text{g}\cdot\text{m}^{-3}$  of the NR (in purple) and the AQeR station (in black). The NR concentrations are calculated at the same locations as the AQeR stations, from 01/01/2014 (Day 1) until 30/04/2014 (last Day). The left panel is for PM<sub>10</sub> surface concentrations while the right one is for PM<sub>2.5</sub>.

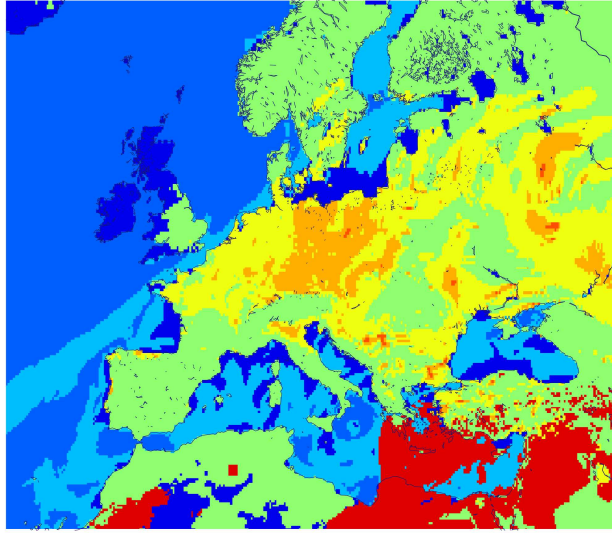

5 **Figure 4: Classification of the NR profiles for the 7<sup>th</sup> of March 2014 at 12 UTC. Deep Blue is for dismissed profiles, Blue is for Maritime Clean, Light Blue for Maritime Polluted, Green is for Continental Clean, Yellow is for Continental Average, Orange is for Continental Polluted, Deep Orange is for Urban, and Red is for Desert Dust.**

10

15

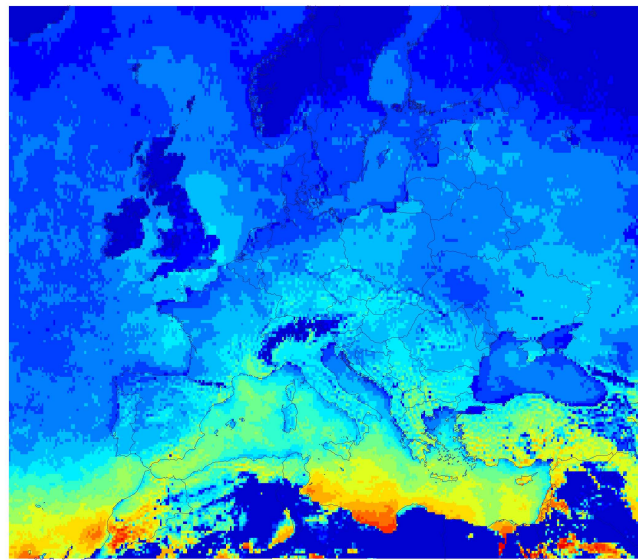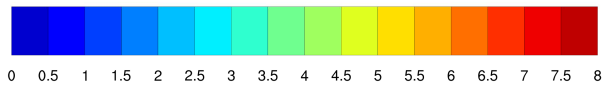

Number of pixels per day

**Figure 5: Average (from January to April) number of selected profiles per day, available for assimilation.**

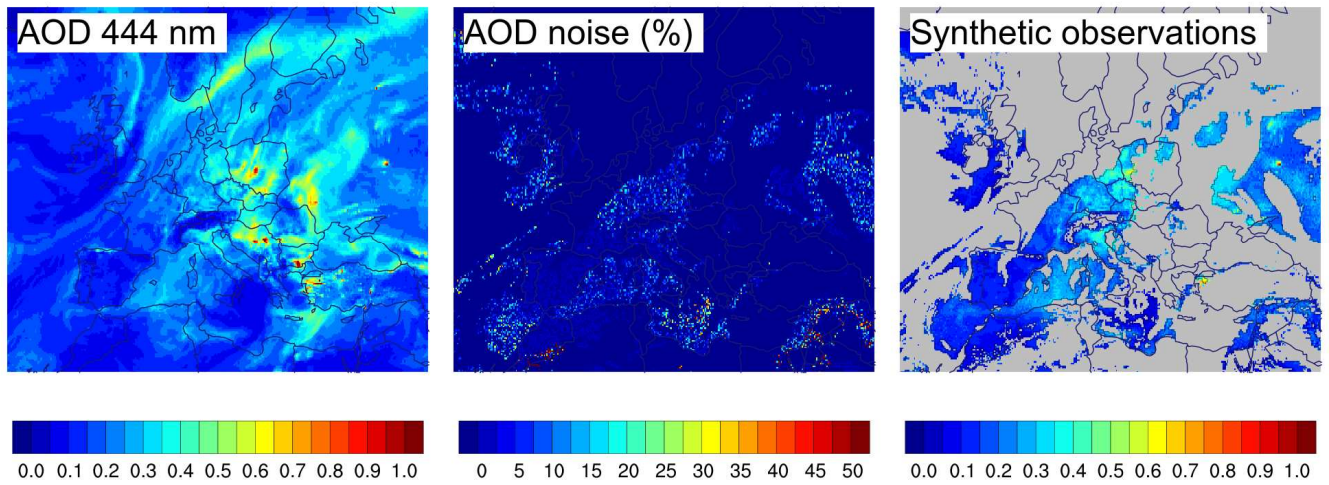

**Figure 6: Example of generation of synthetic observations on the 7<sup>th</sup> of March 2014 at 12 UTC. From the NR's AOD as 444 nm (left panel), noise values representative of FCI (middle panel) are applied on every clear-sky pixel to generate the synthetic observations (right panel). The grey color represents the dismissed profiles.**

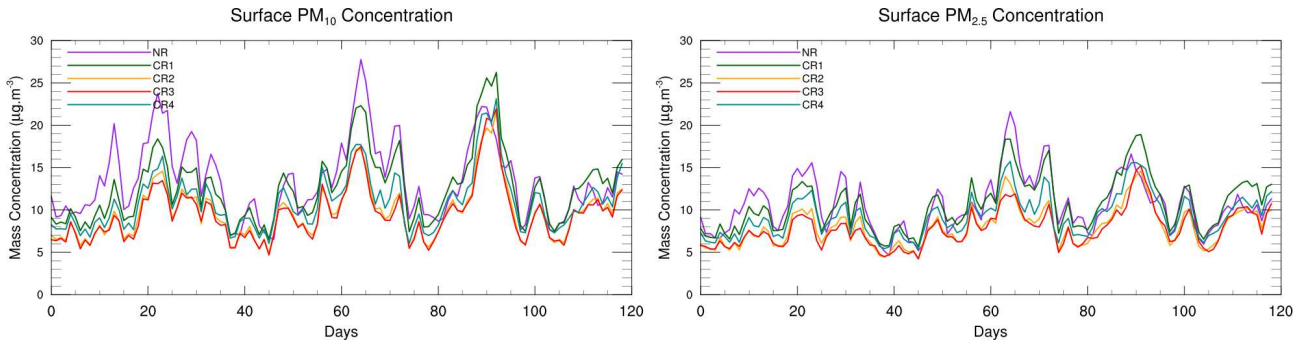

Figure 7: Median of the daily mean surface concentration of the NR (in purple) and the different CR (CR1 in green, CR2 in yellow, CR3 in red and CR4 in blue) determined for the same location as for the AQeR stations. The left graph is the PM<sub>10</sub> mass concentrations (µg.m<sup>-3</sup>), while the right one represents the PM<sub>2.5</sub> mass concentrations.

5

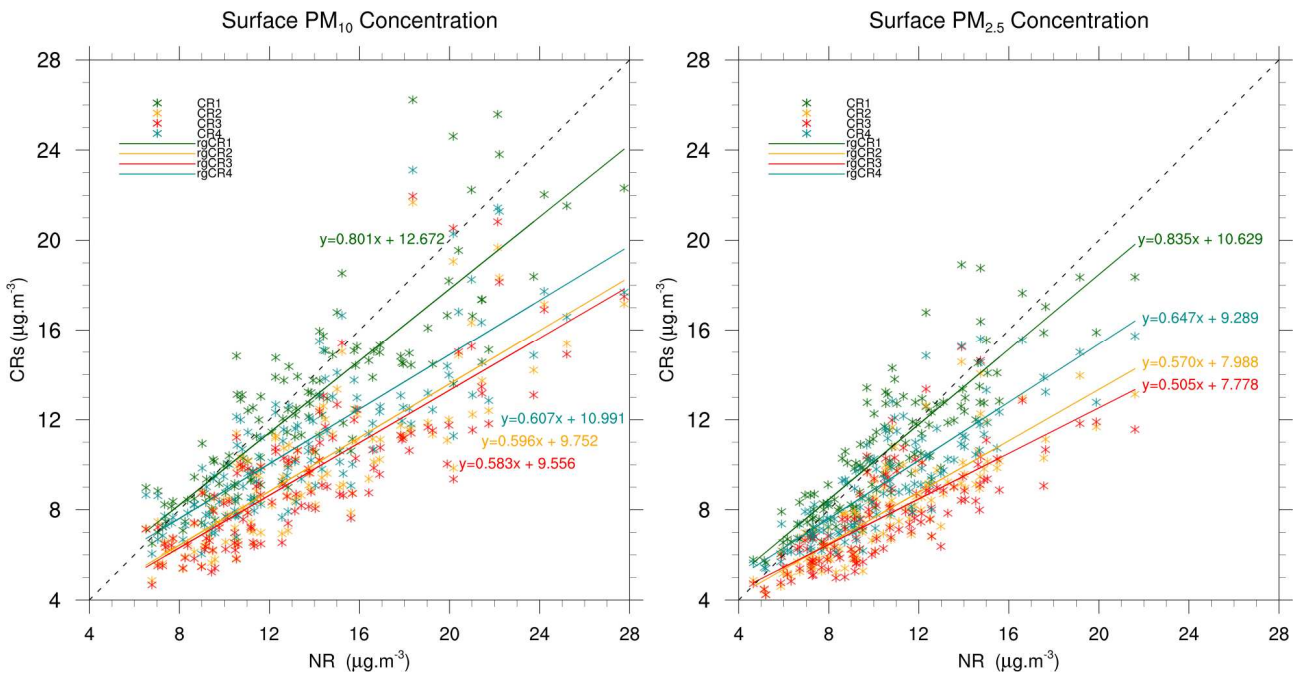

Figure 8: Scatter plot of the CRs daily surface concentrations (µg.m<sup>-3</sup>) as function of NR daily surface concentrations for PM<sub>10</sub> (left) and PM<sub>2.5</sub> (right), for virtual stations and from January to April 2014. rgCRX are the linear regressions of each dataset.

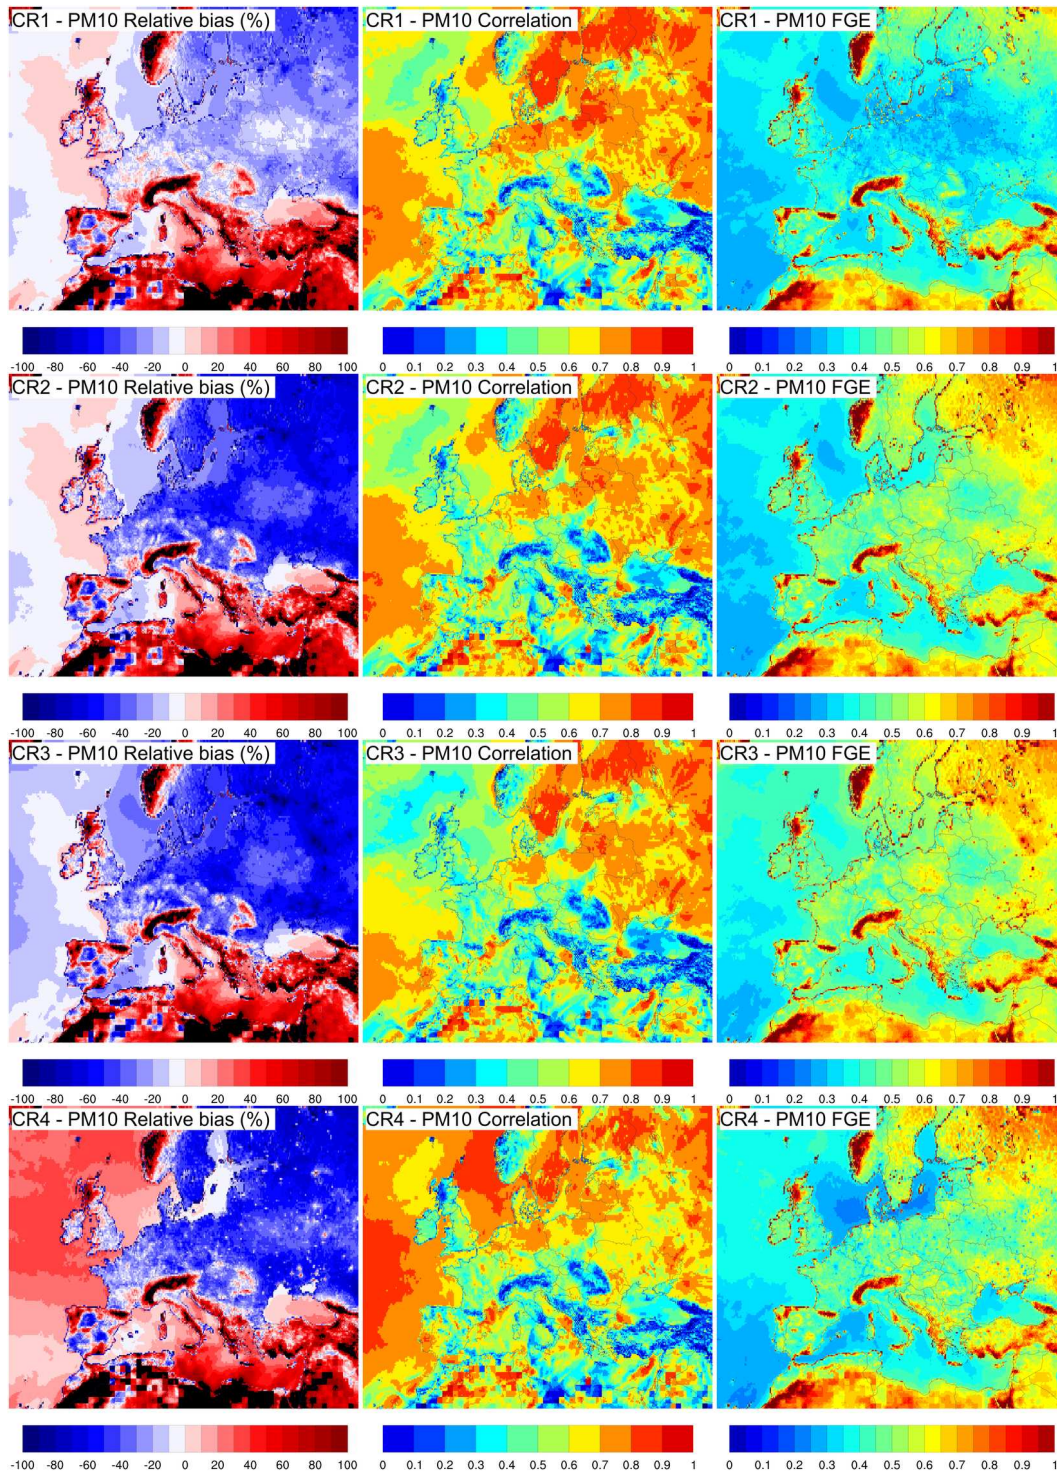

Figure 9: For each CR (CR1, CR2, CR3 and CR4), the figures represent a PM<sub>10</sub> comparison between the NR and the CRs from January to April 2014: the relative bias (in %), the Pearson correlation and the fractional gross error.

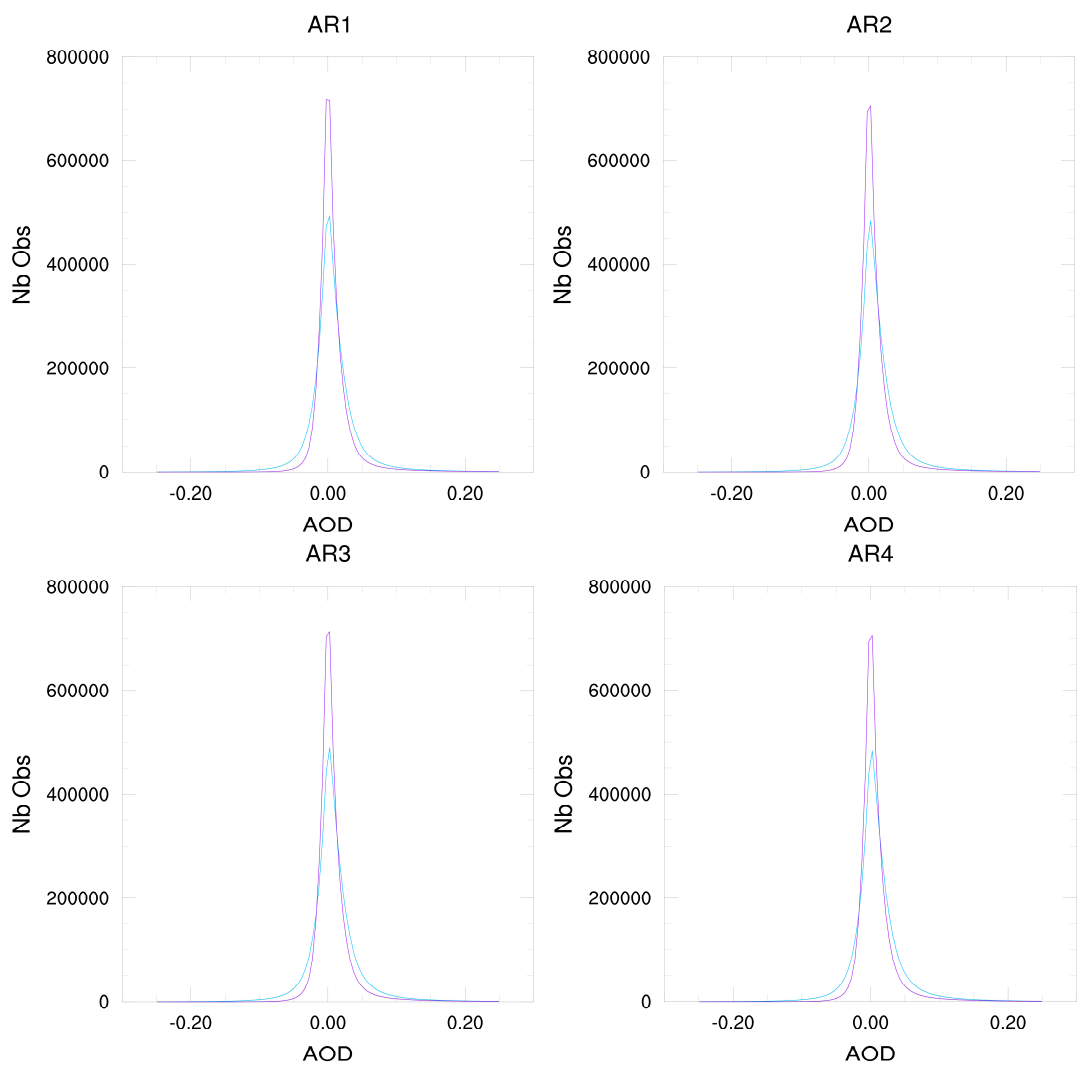

**Figure 10: Histograms of differences between synthetic observations and forecast fields (blue) and between synthetic observations and analyzed field (purple) for the four assimilation runs.**



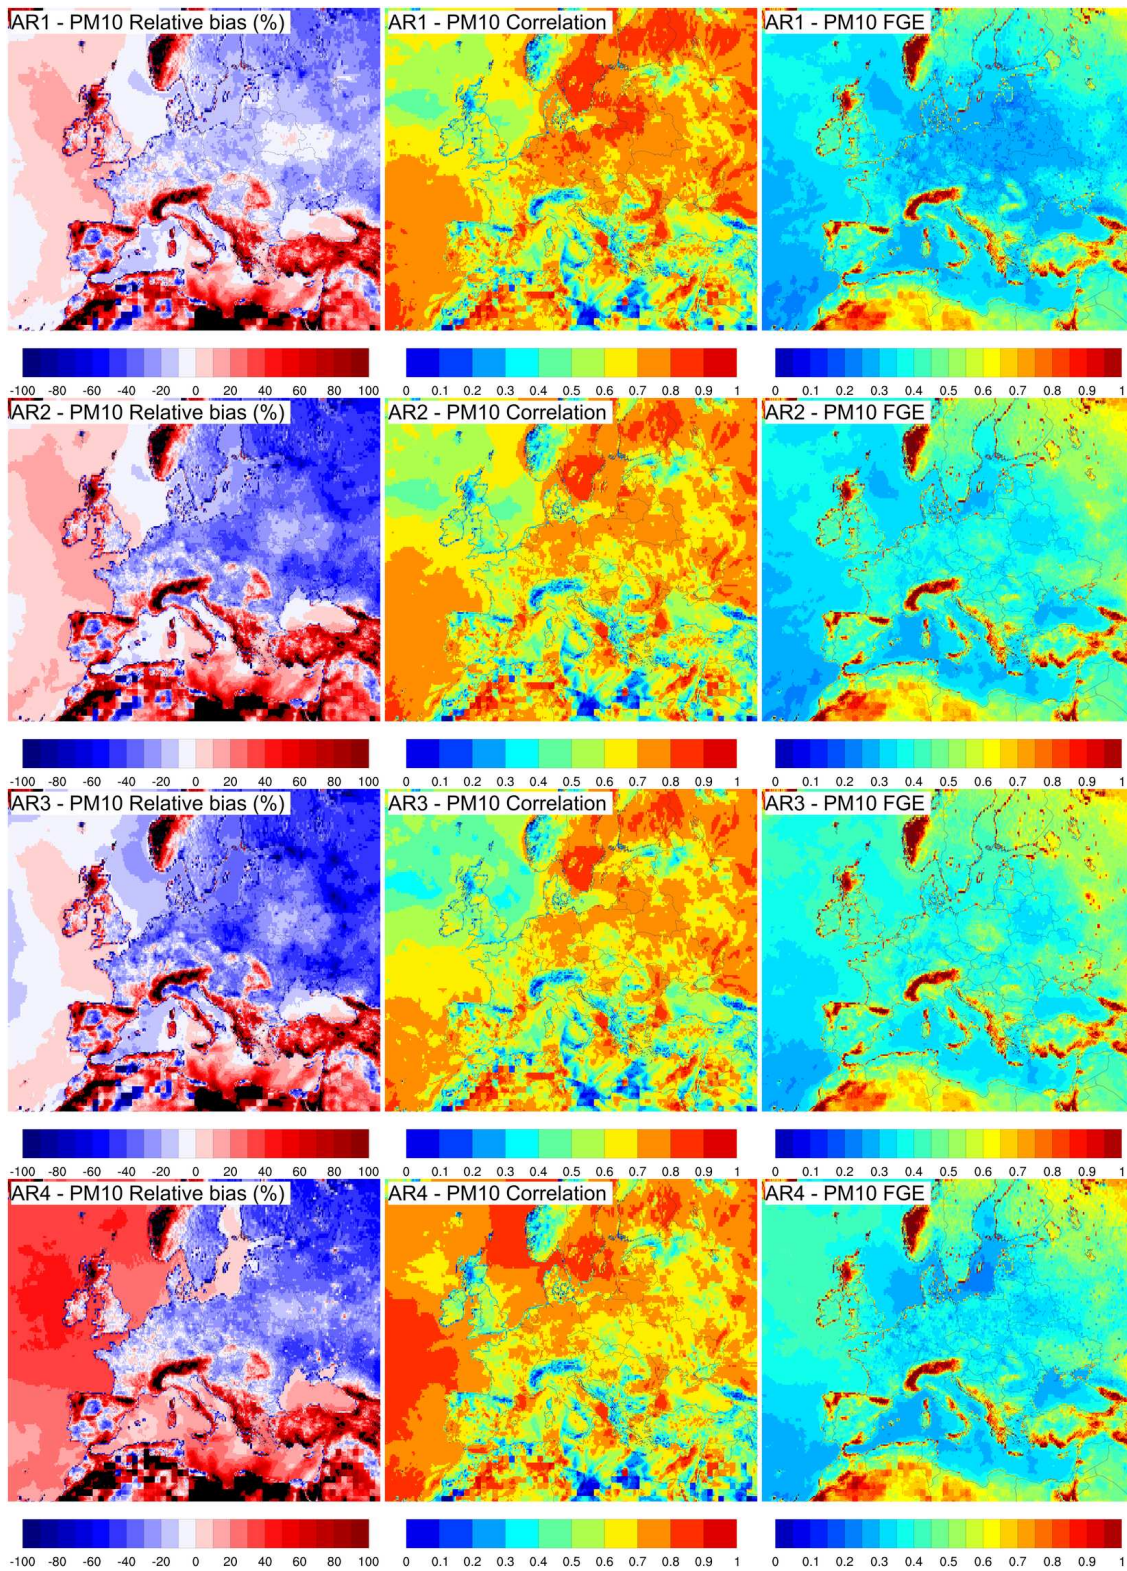

Figure 11: Same legend as Figure 9, for assimilation runs (AR) instead of control runs (CR).

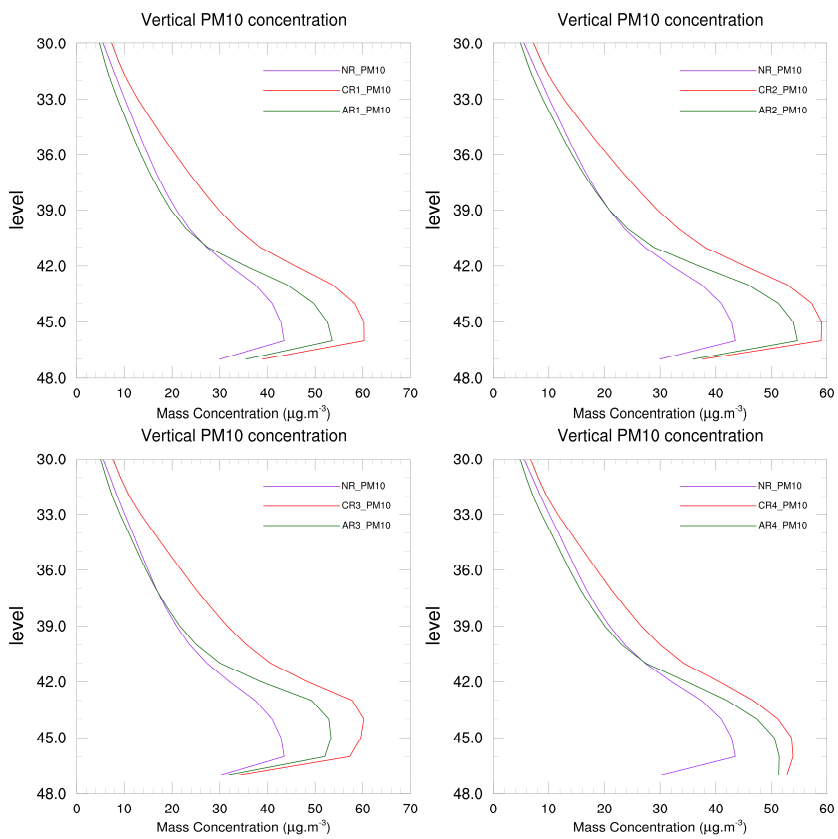

**Figure 12: Mean vertical profile, from January to April, over the domain of the concentrations ( $\mu\text{g.m}^{-3}$ ) of  $\text{PM}_{10}$  for the 4 set of simulations (1 in top left, 2 in top right, 3 in down left and 4 in down right). The NR is in purple, the CR is in red and the AR is in green.**

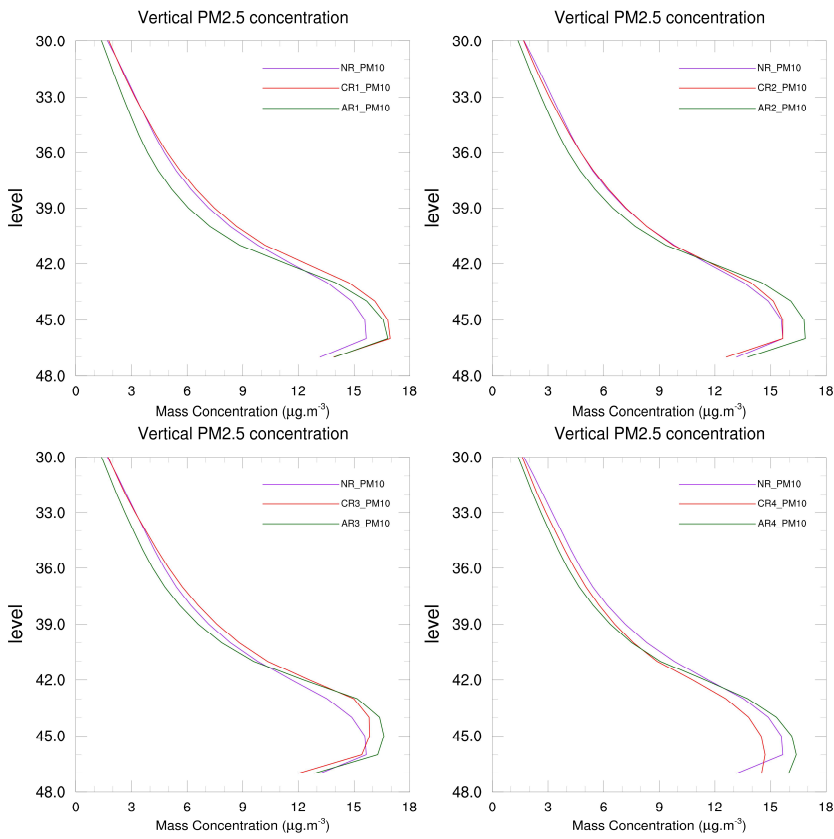

**Figure 13: Mean vertical profile, from January to April, over the domain of the concentrations ( $\mu\text{g.m}^{-3}$ ) of  $\text{PM}_{2.5}$  for the 4 set of simulations (1 in top left, 2 in top right, 3 in down left and 4 in down right). The NR is in purple, the CR is in red and the AR is in green.**

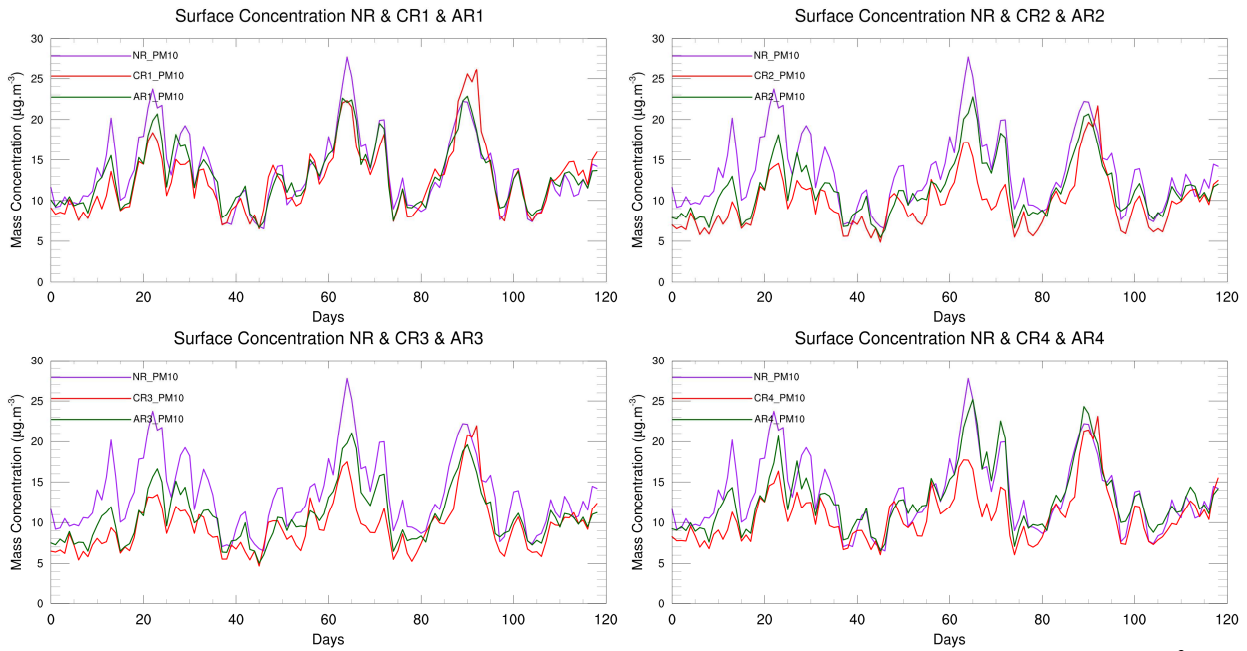

**Figure 14: Median values over the AQeR station locations of the daily mean  $PM_{10}$  surface concentration ( $\mu g \cdot m^{-3}$ ) for the NR (in purple) and the different CR (red) & AR (green) simulations (CR-AR-1 top left, CR-AR-2 top right, CR-AR-3 down left, CR-AR-4 down right).**

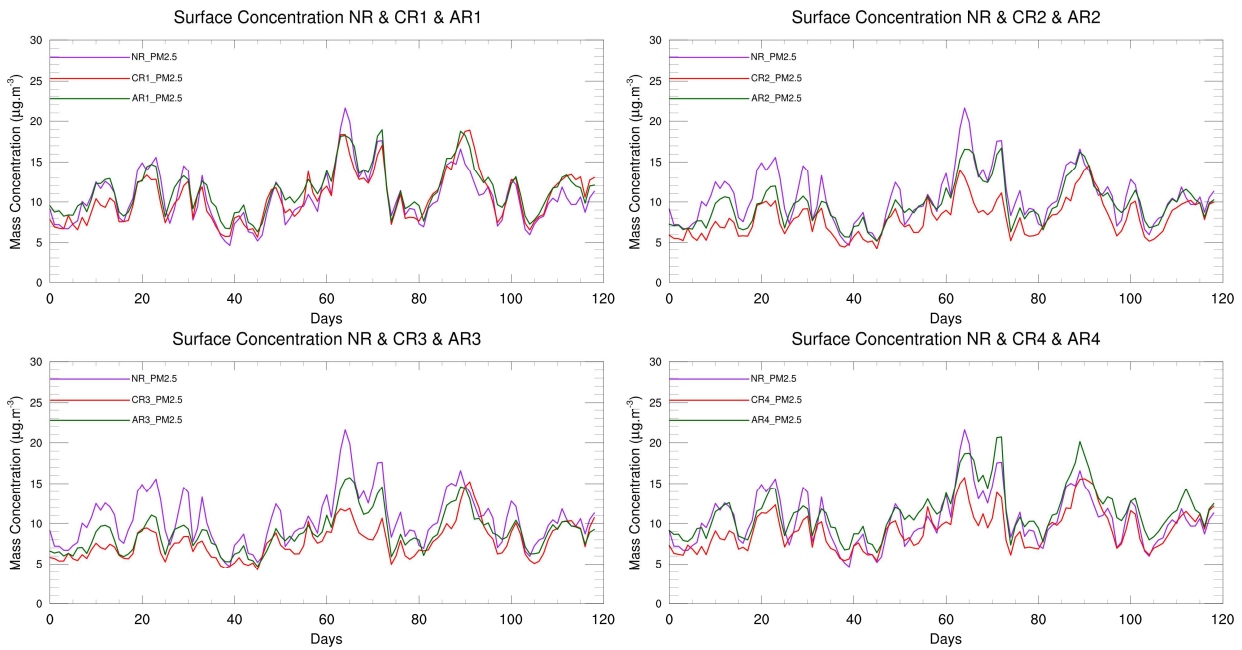

**Figure 15: Same legend as Figure 14 for  $PM_{2.5}$  concentrations.**

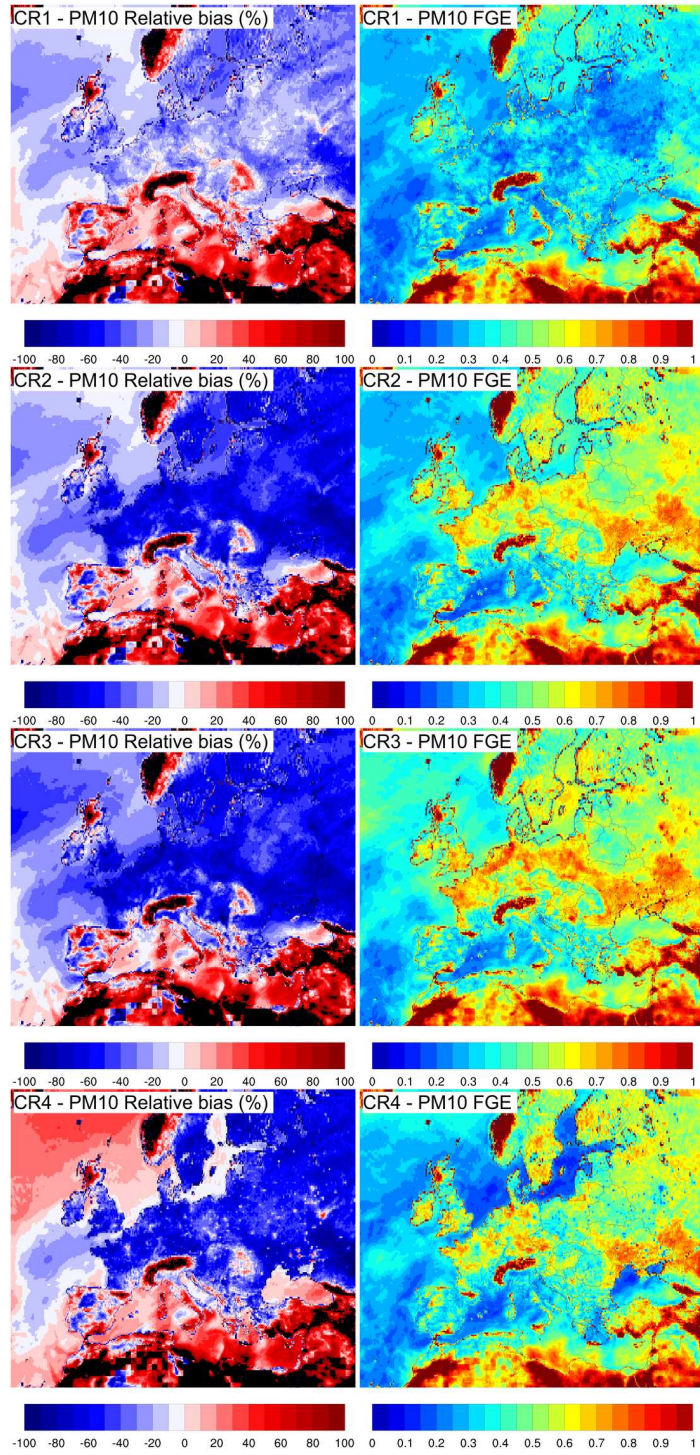

**Figure16: PM<sub>10</sub> comparison between the NR and the CRs from the 7<sup>th</sup> March to the 15<sup>th</sup> March 2014: relative bias and fractional gross error.**

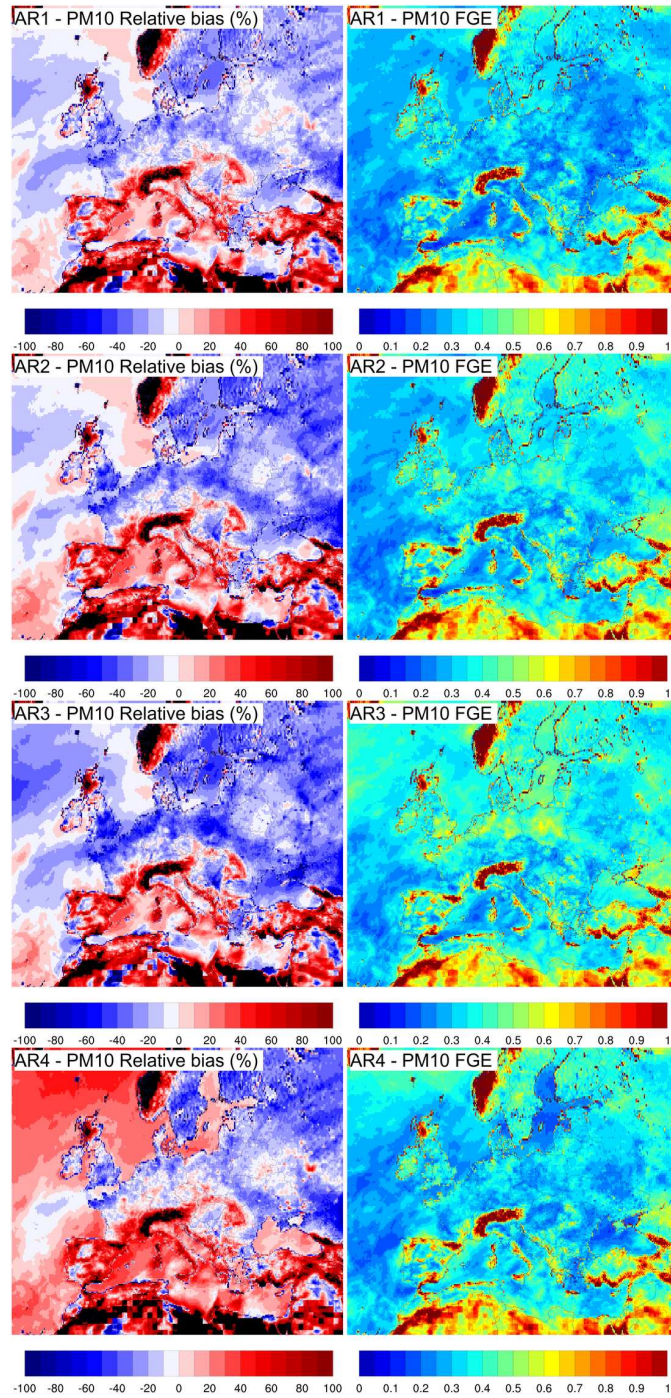

**Figure 17: Same legend as Figure 16 for assimilation runs (AR) instead of control runs (CR).**

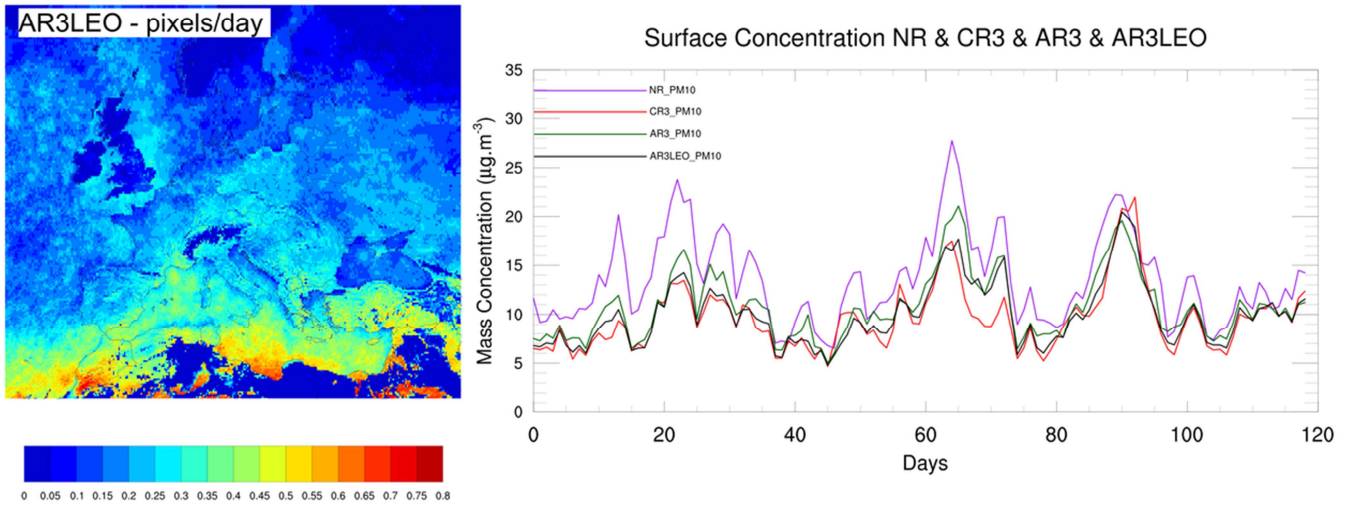

Figure 18 : Results of the assimilation run AR3LEO: density of assimilated synthetic observations (upper-left panel, to be compared with Figure 6), time series of concentration of  $PM_{10}$  at surface for NR, CR3, AR3, AR3LEO (upper-right panel) between 1<sup>st</sup> January and 30<sup>th</sup> April 2014,  $PM_{10}$  relative bias and FGE of AR3LEO from 7 to 14 March 2014 (to be compared with Figure 17).

5

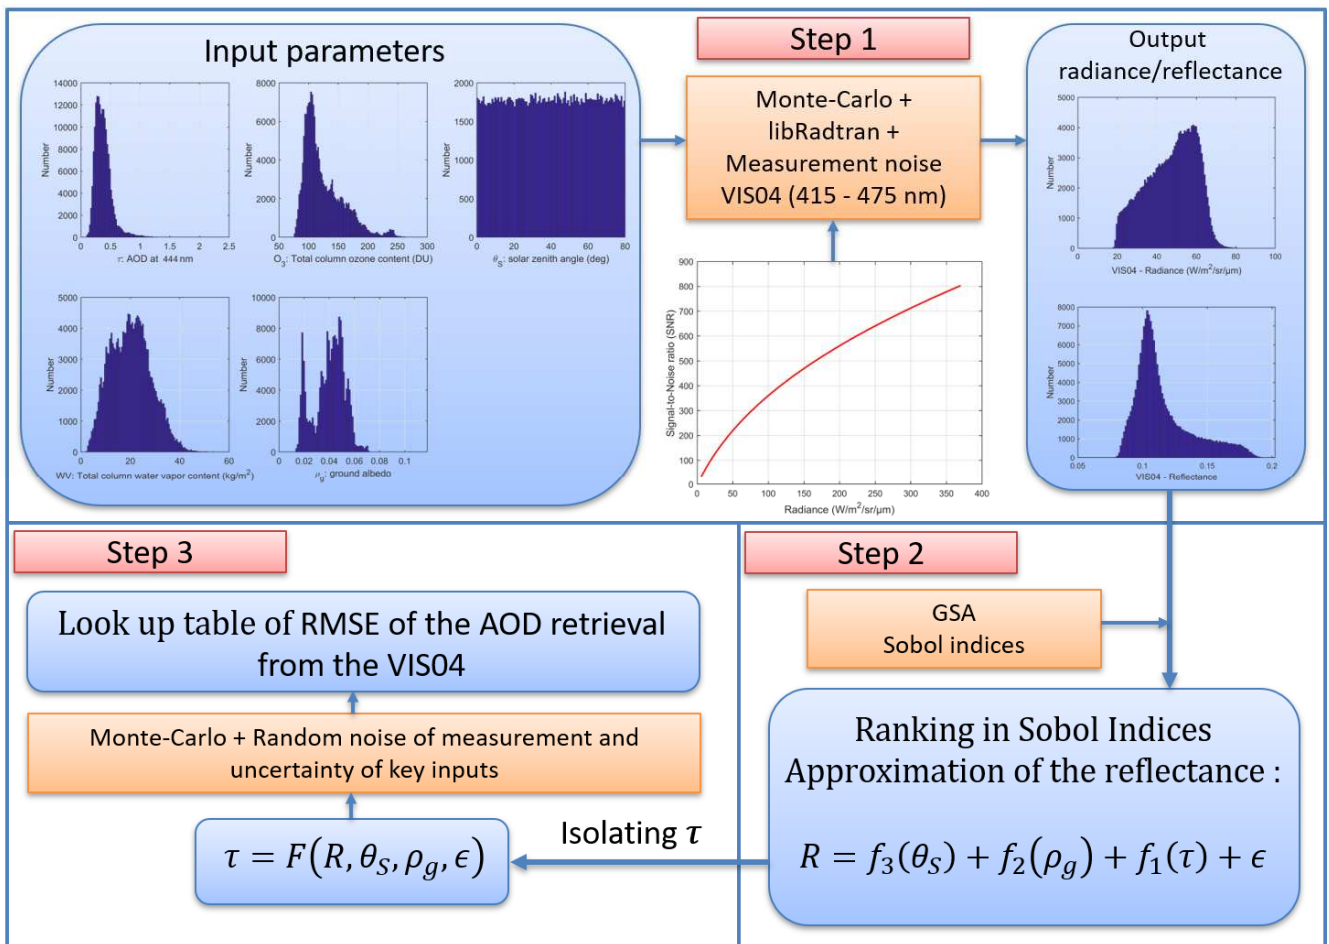

5 **Figure A1:** Summary of the methodology to derive the RMSE of AOD from the FCI reflectance simulator. Step 1 is the computation of FCI radiance. Input parameters are the histograms of AOD, ozone total column, total water vapor content, ground albedo and solar zenithal angle. The libRadtran simulator simulates the distribution of radiance and reflectance in the VIS04 channel and takes into account the signal-to-noise ratio of FCI. Step 2 is the approximation of the reflectance in functions of key parameters using a Global Analysis Sensitivity method and Sobol indices. Step 3 is the retrieval of the AOD RMSE using random noise of measurement and the uncertainty of key parameters.



# Monitoring aerosols over Europe: an assessment of the potential benefit of assimilating the VIS04 measurements from the future MTG/FCI geostationary imager

Maxence Descheemaeker<sup>1</sup>, Matthieu Plu<sup>1</sup>, Virginie Marécal<sup>1</sup>, Marine Claeymann<sup>2</sup>, Francis Olivier<sup>2</sup>,  
5 Youva Aoun<sup>3</sup>, Philippe Blanc<sup>3</sup>, Lucien Wald<sup>3</sup>, Jonathan Guth<sup>1</sup>, Bojan Sič<sup>1</sup>, Jérôme Vidot<sup>4</sup>, Andrea  
Piacentini<sup>5</sup>, Béatrice Josse<sup>1</sup>

1CNRM, Université de Toulouse, Météo-France, CNRS, Toulouse, France

2Thales Alenia Space, Cannes la Bocca, 06156, France

10 3Mines ParisTech, PSL Research University, O.I.E.- Center for Observation, Impacts, Energy, Sophia Antipolis, 06904,  
France

4Centre de Météorologie Spatiale, Météo-France, 22300, Lannion, France

5CERFACS – CNRS, UMR5318, 31057, Toulouse, France

*Correspondence to:* Maxence Descheemaeker (maxence.descheemaeker@meteo.fr)

15 **1 Supplementary Material**

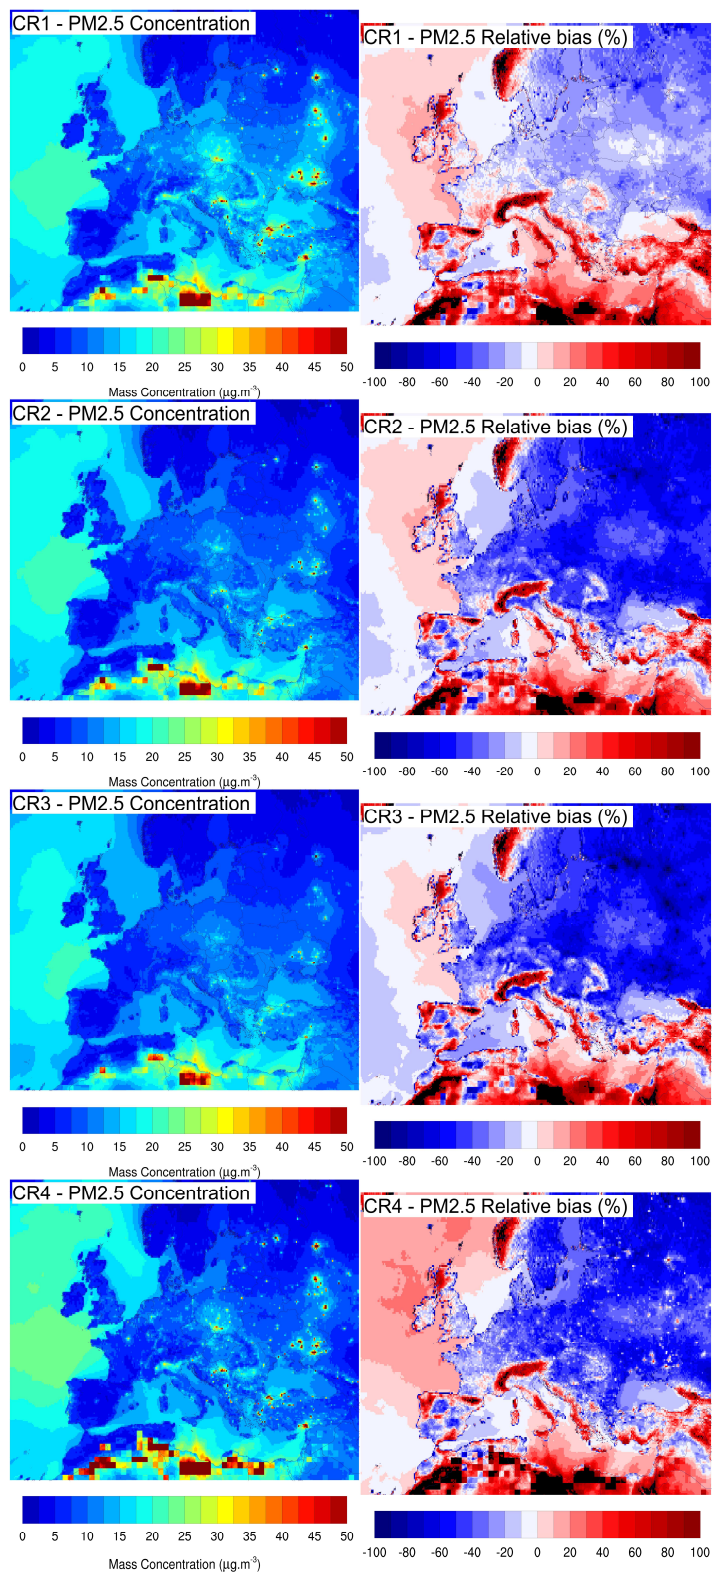

**Figure S1:** For each CR (CR1, CR2, CR3 and CR4), the figures represent a PM<sub>2.5</sub> comparison between the NR and the CRs from January to April 2014: the mean surface concentration of the CR and the normalized differences between CRs and the NR.

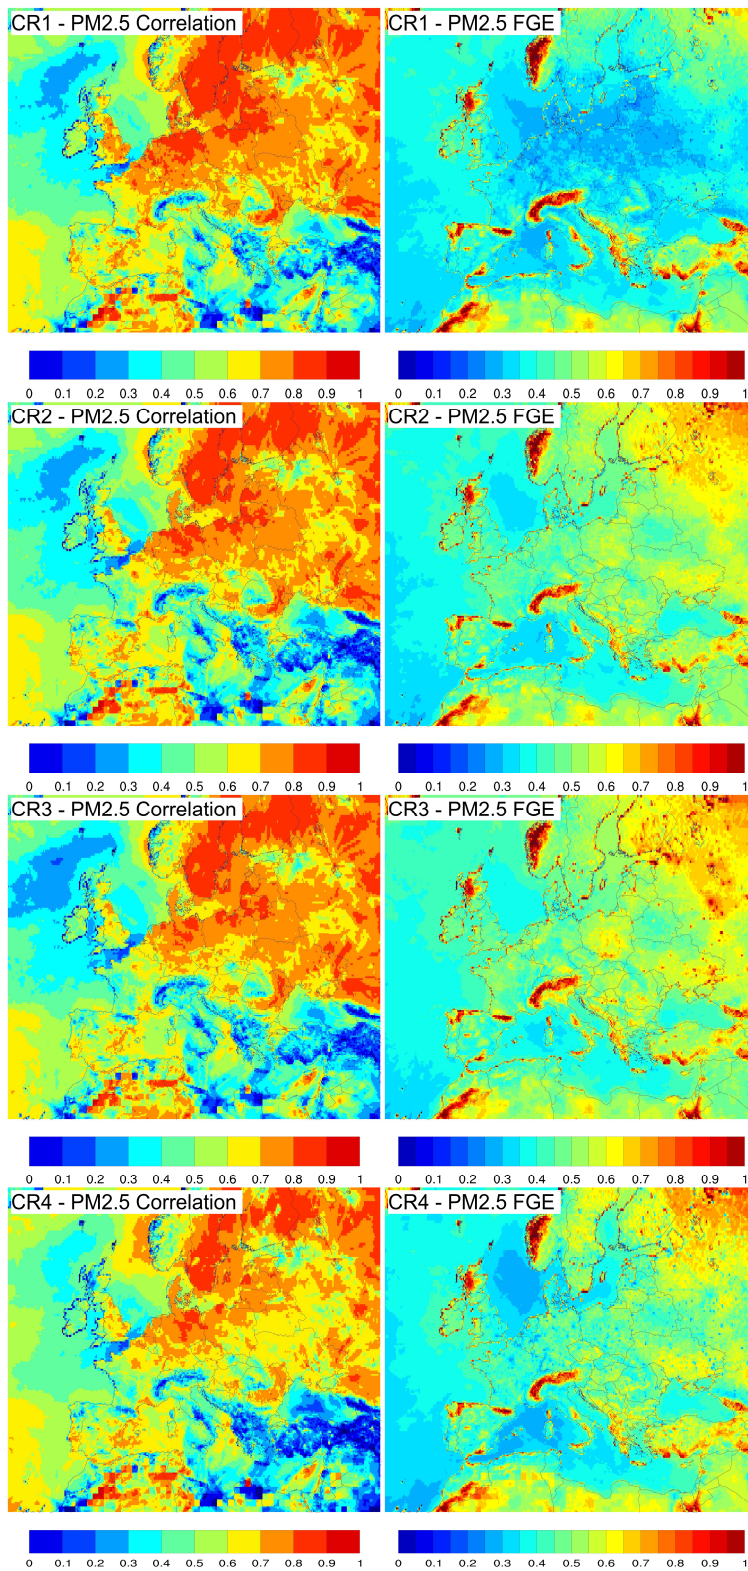

**Figure S2:** For each CR (CR1, CR2, CR3 and CR4), the figures represent a PM<sub>2.5</sub> comparison between the NR and the CRs from January to April 2014: the Pearson correlation and the fractional gross error.

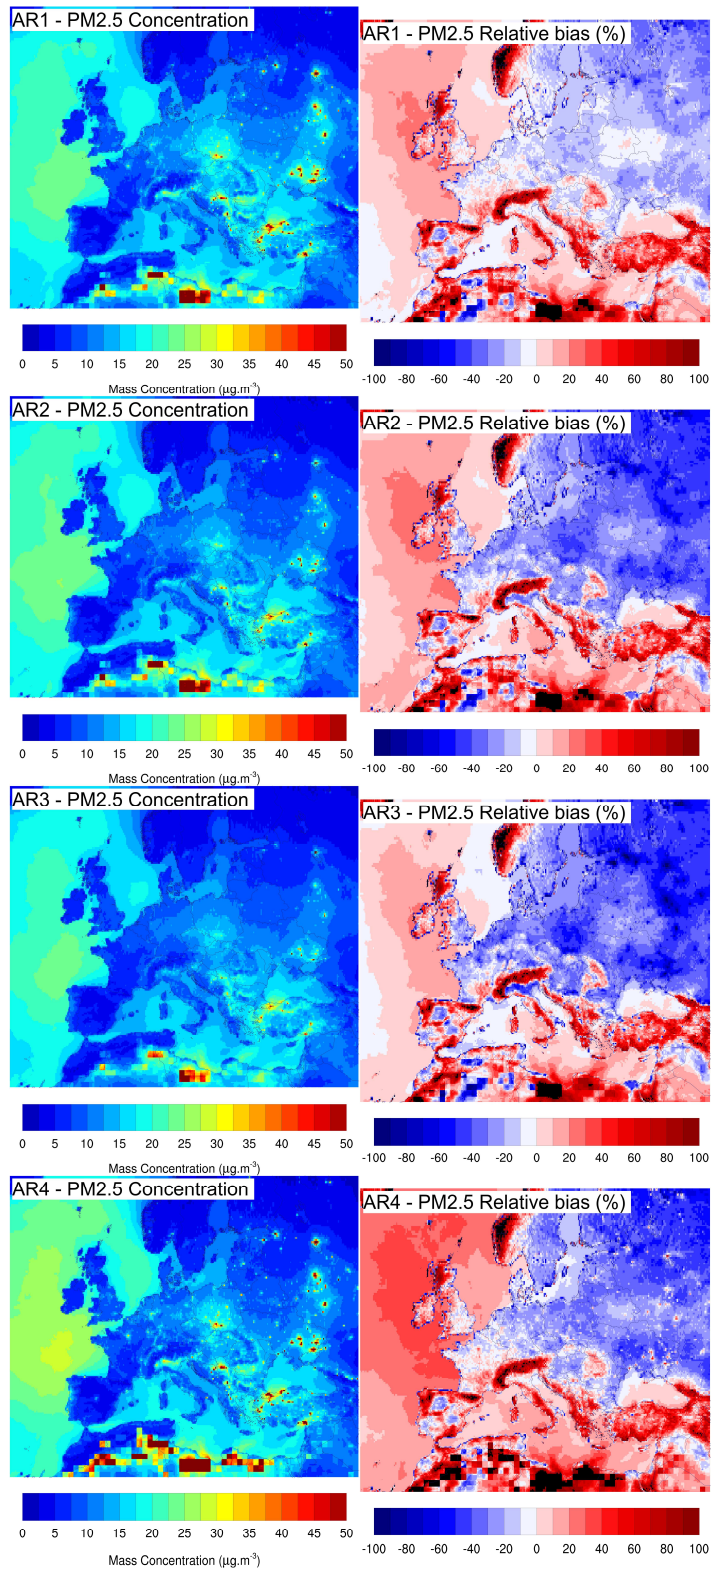

**Figure S3:** For each AR (AR1, AR2, AR3 and AR4), the figures represent a PM<sub>2.5</sub> comparison between the NR and the ARs from January to April 2014: the mean surface concentration of the AR and the normalized differences between ARs and the NR.

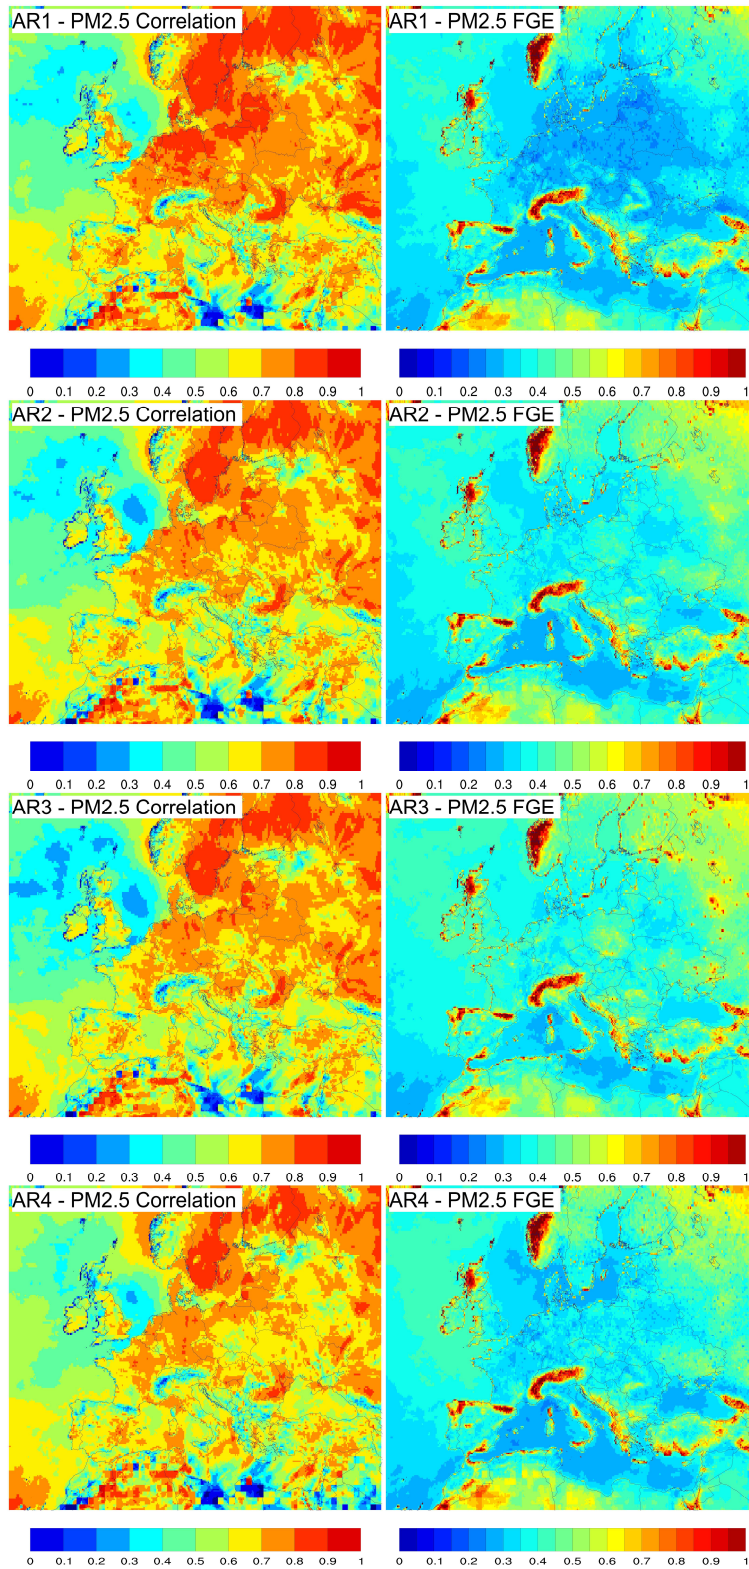

**Figure S4:** For each AR (AR1, AR2, AR3 and AR4), the figures represent a  $PM_{2.5}$  comparison between the NR and the ARs from January to April 2014: the Pearson correlation and the fractional gross error.

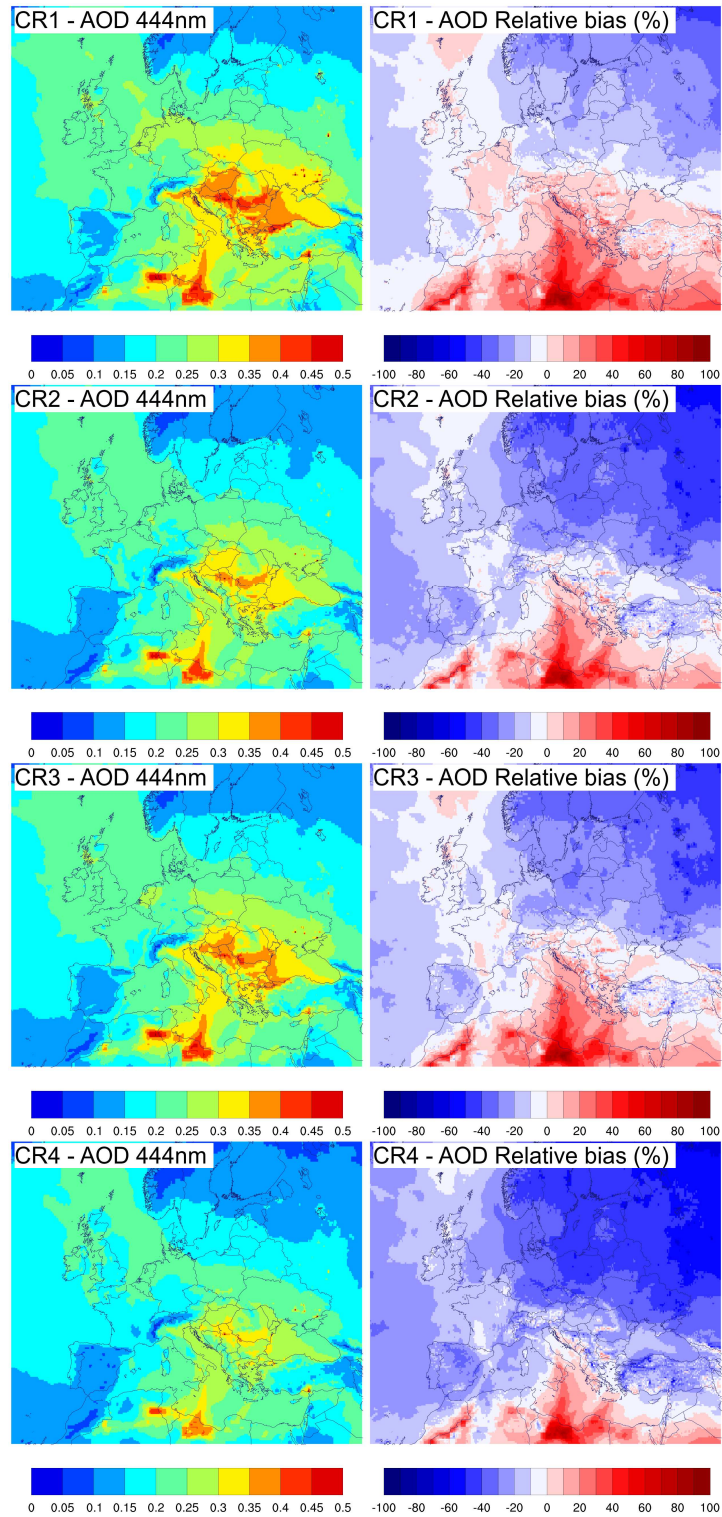

**Figure S5: For each CR, the figures represent the mean AOD of the CR and the normalized differences between the NR and the CR for the period from January to April 2014.**

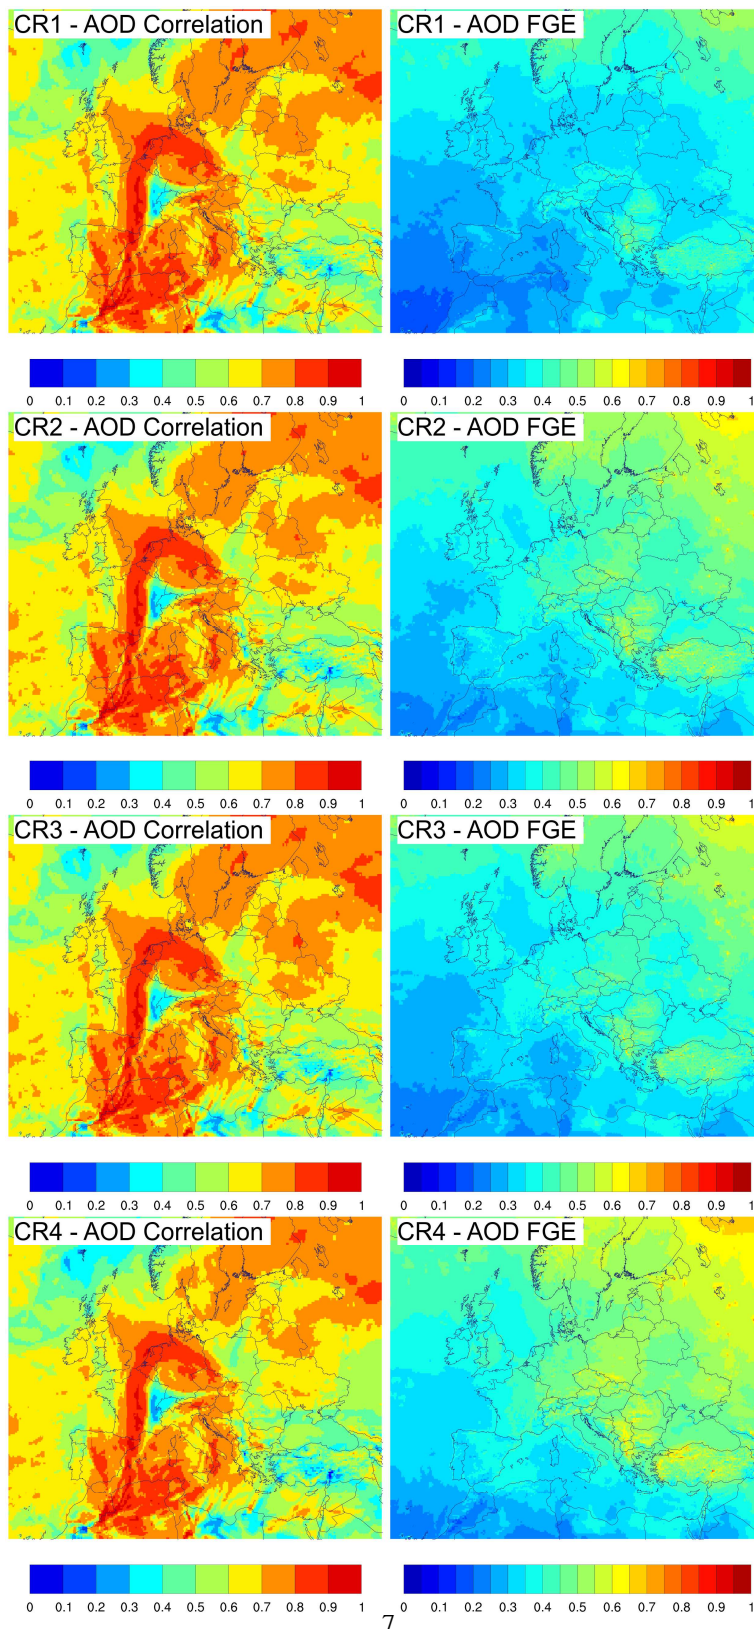

Figure S6: For each CR, the figures represent the Pearson correlation and the fractional gross error of AOD between the NR and the CR for the period from January to April 2014.

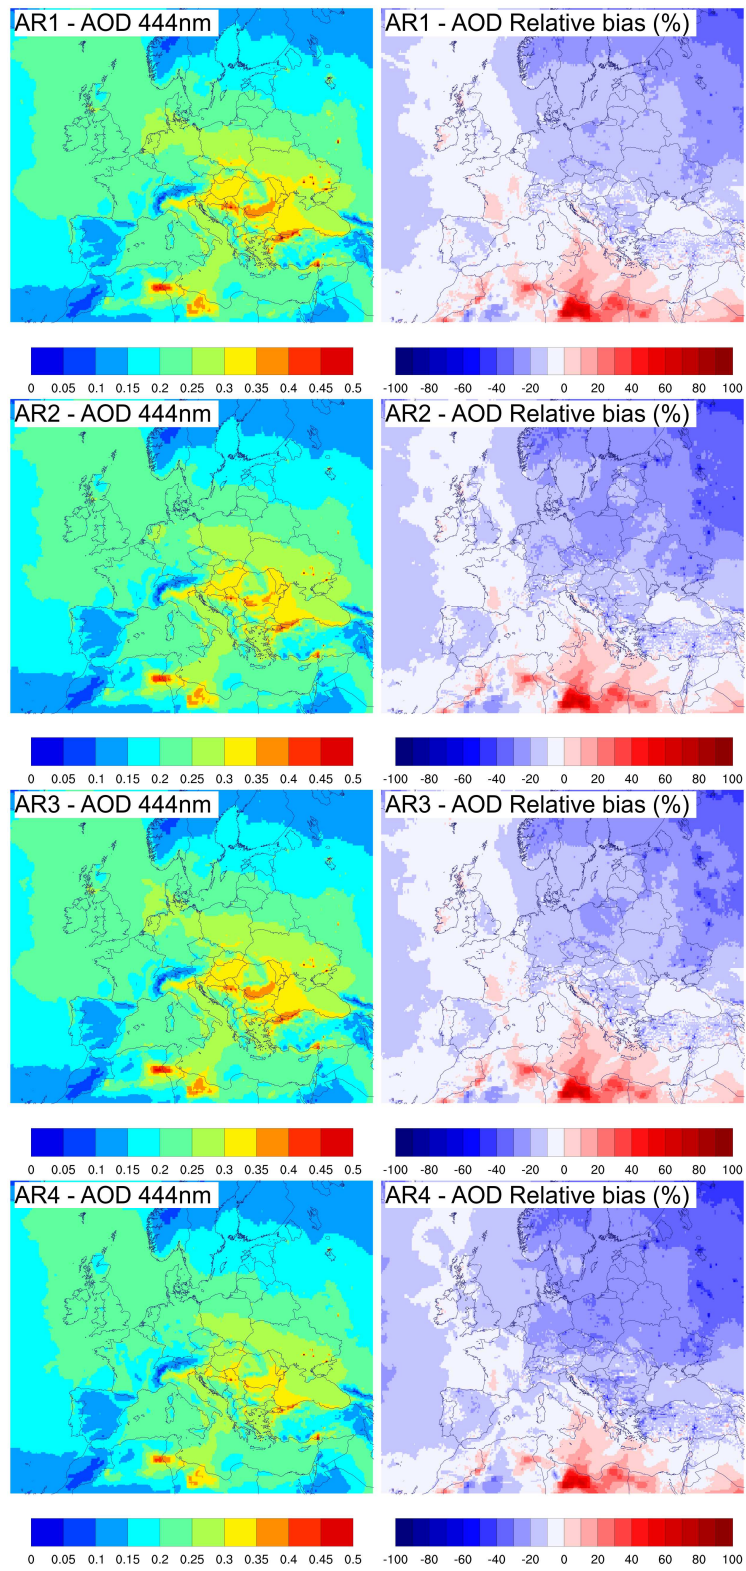

**Figure S7: For each AR, the figures represent the mean AOD of the AR and the normalized differences between the NR and the AR for the period from January to April 2014.**



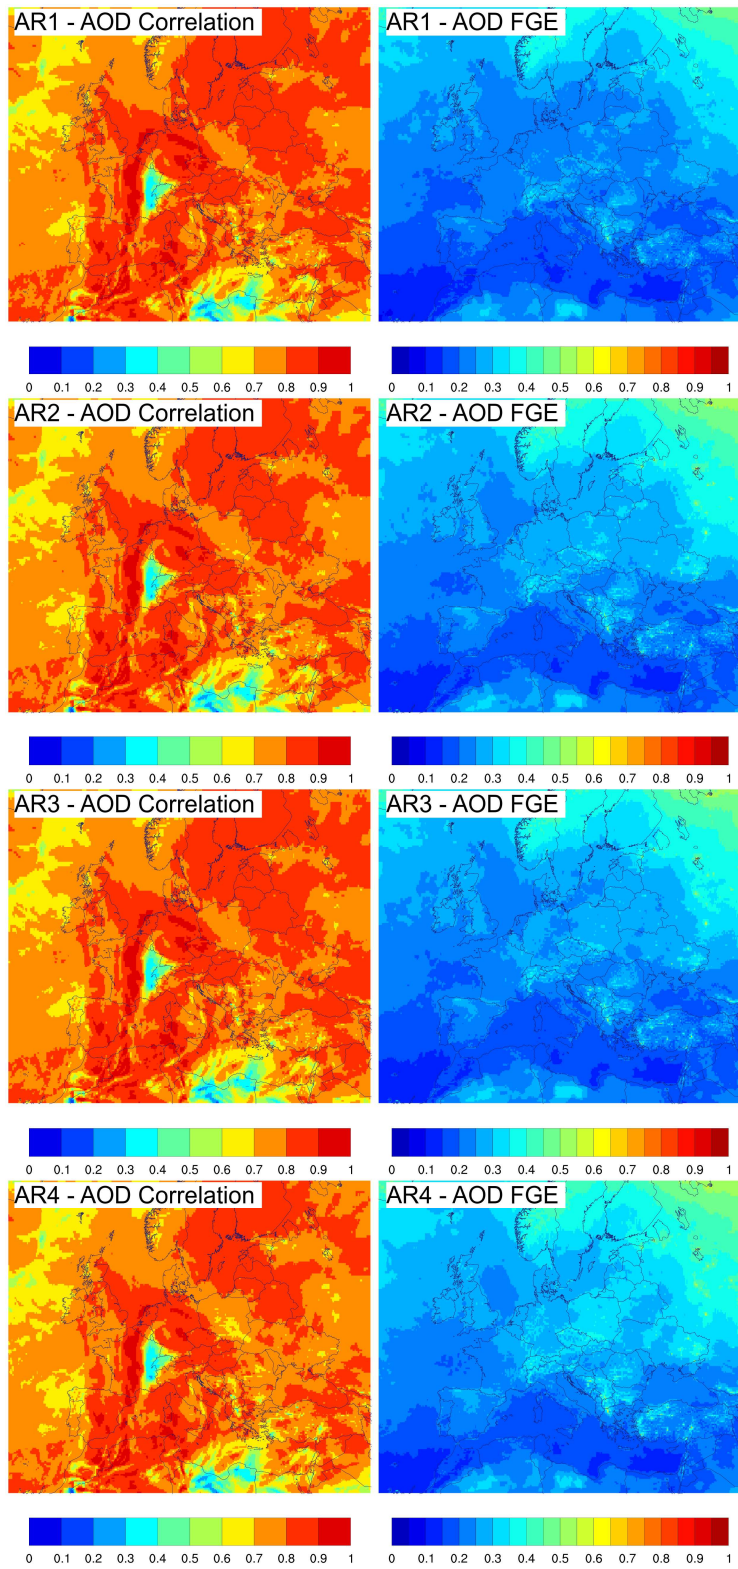

**Figure S8:** For each AR, the figures represent the Pearson correlation and the fractional gross error of AOD between the NR and the AR for the period from January to April 2014.
